# Supplementary material for: Staphyloferrin A as siderophore-component in fluoroquinolone-based Trojan horse antibiotics
Source: Royal Society of Chemistry journal article supplement (doi:10.1039/c3ob40162f), 2013-01-01
Supplement: c3ob40162f.pdf [file c3ob40162f.pdf]

## Synthesis, characterisation and antimicrobial activity of conjugates between fluoroquinolones and staphyloferrin-type siderophores

Stephen J. Milner<sup>a</sup>, Alexandra Seve<sup>a</sup>, Anna M. Snelling<sup>b</sup>, Gavin H. Thomas<sup>c</sup>, Kevin G. Kerr<sup>b, d</sup>, Anne Routledge<sup>a\*</sup>, Anne-Kathrin Duhme-Klair<sup>a\*</sup>

Data for (2*R*)-2, 5-bis({[(*tert*-butoxy)carbonyl]amino})pentanoic acid (2a).

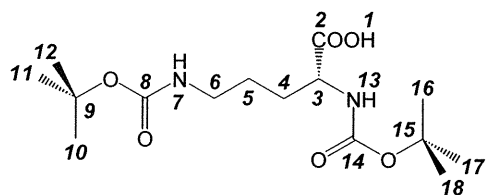

<sup>1</sup>H NMR (CDCl<sub>3</sub>, 400 MHz) δ<sub>H</sub> 9.21 (1H, br s, H-1), 5.25 (1H, d, <sup>3</sup>J<sub>H-H</sub> = 7.40 Hz, H-13), 4.80 (1H, br s, H-7), 4.32 (1H, br s, H-3), 3.14-3.13 (2H, br m, H-6), 1.87-1.87 (1H, br m, H-4), 1.73-1.61 (1H, br m, H-4), 1.59-1.56 (2H, m, H-5), 1.43 (18H, s, H-10, 11, 12, 16, 17, 18).

<sup>13</sup>C NMR (CDCl<sub>3</sub>, 100 MHz) δ<sub>C</sub> 175.93 (C=O, C-2), 156.57 (C=O, C-14), 155.83 (C=O, C-8), 80.25 (4°-C, C-14), 79.74 (4°-C, C-9), 53.09 (CH, C-3), 40.07 (CH<sub>2</sub>, C-6), 29.96 (CH<sub>2</sub>, C-4), 28.52 (CH<sub>3</sub>, C-16, 17, 18), 28.46 (CH<sub>3</sub>, C-10, 11, 12), 26.17 (CH<sub>2</sub>, C-5).

c8373sjm: SJM-16-04-10 [DBD-Ornithine]

Acquisition Freq. = 399.785 MHz (ECS-spectrometer)

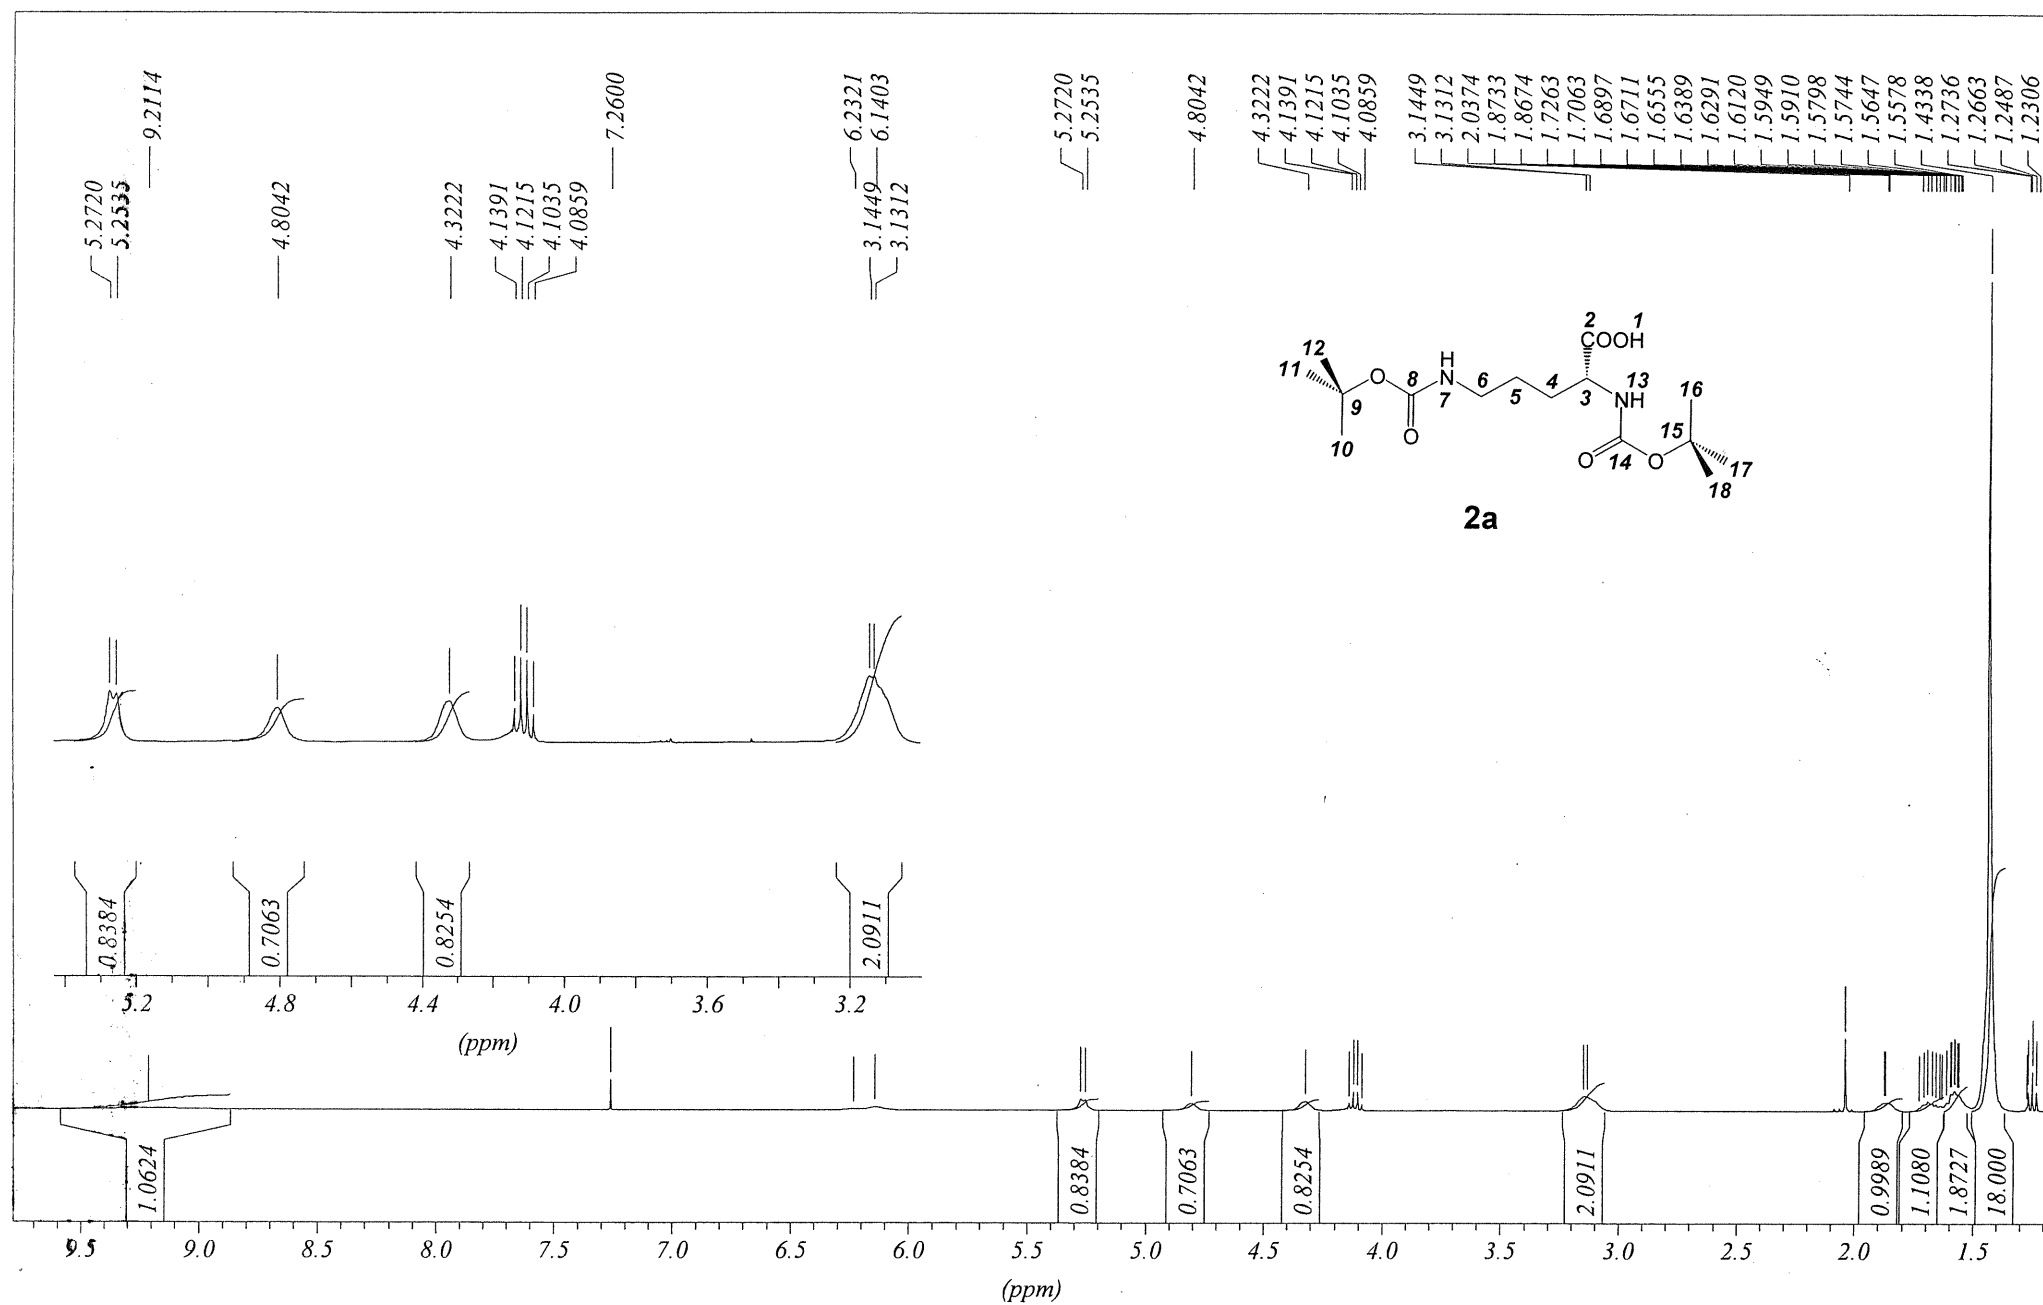

e8388sjm: SJM-16-04-10 [DBD-Ornithine]

Acquisition Freq. = 100.535 MHz (ECS-spectrometer)

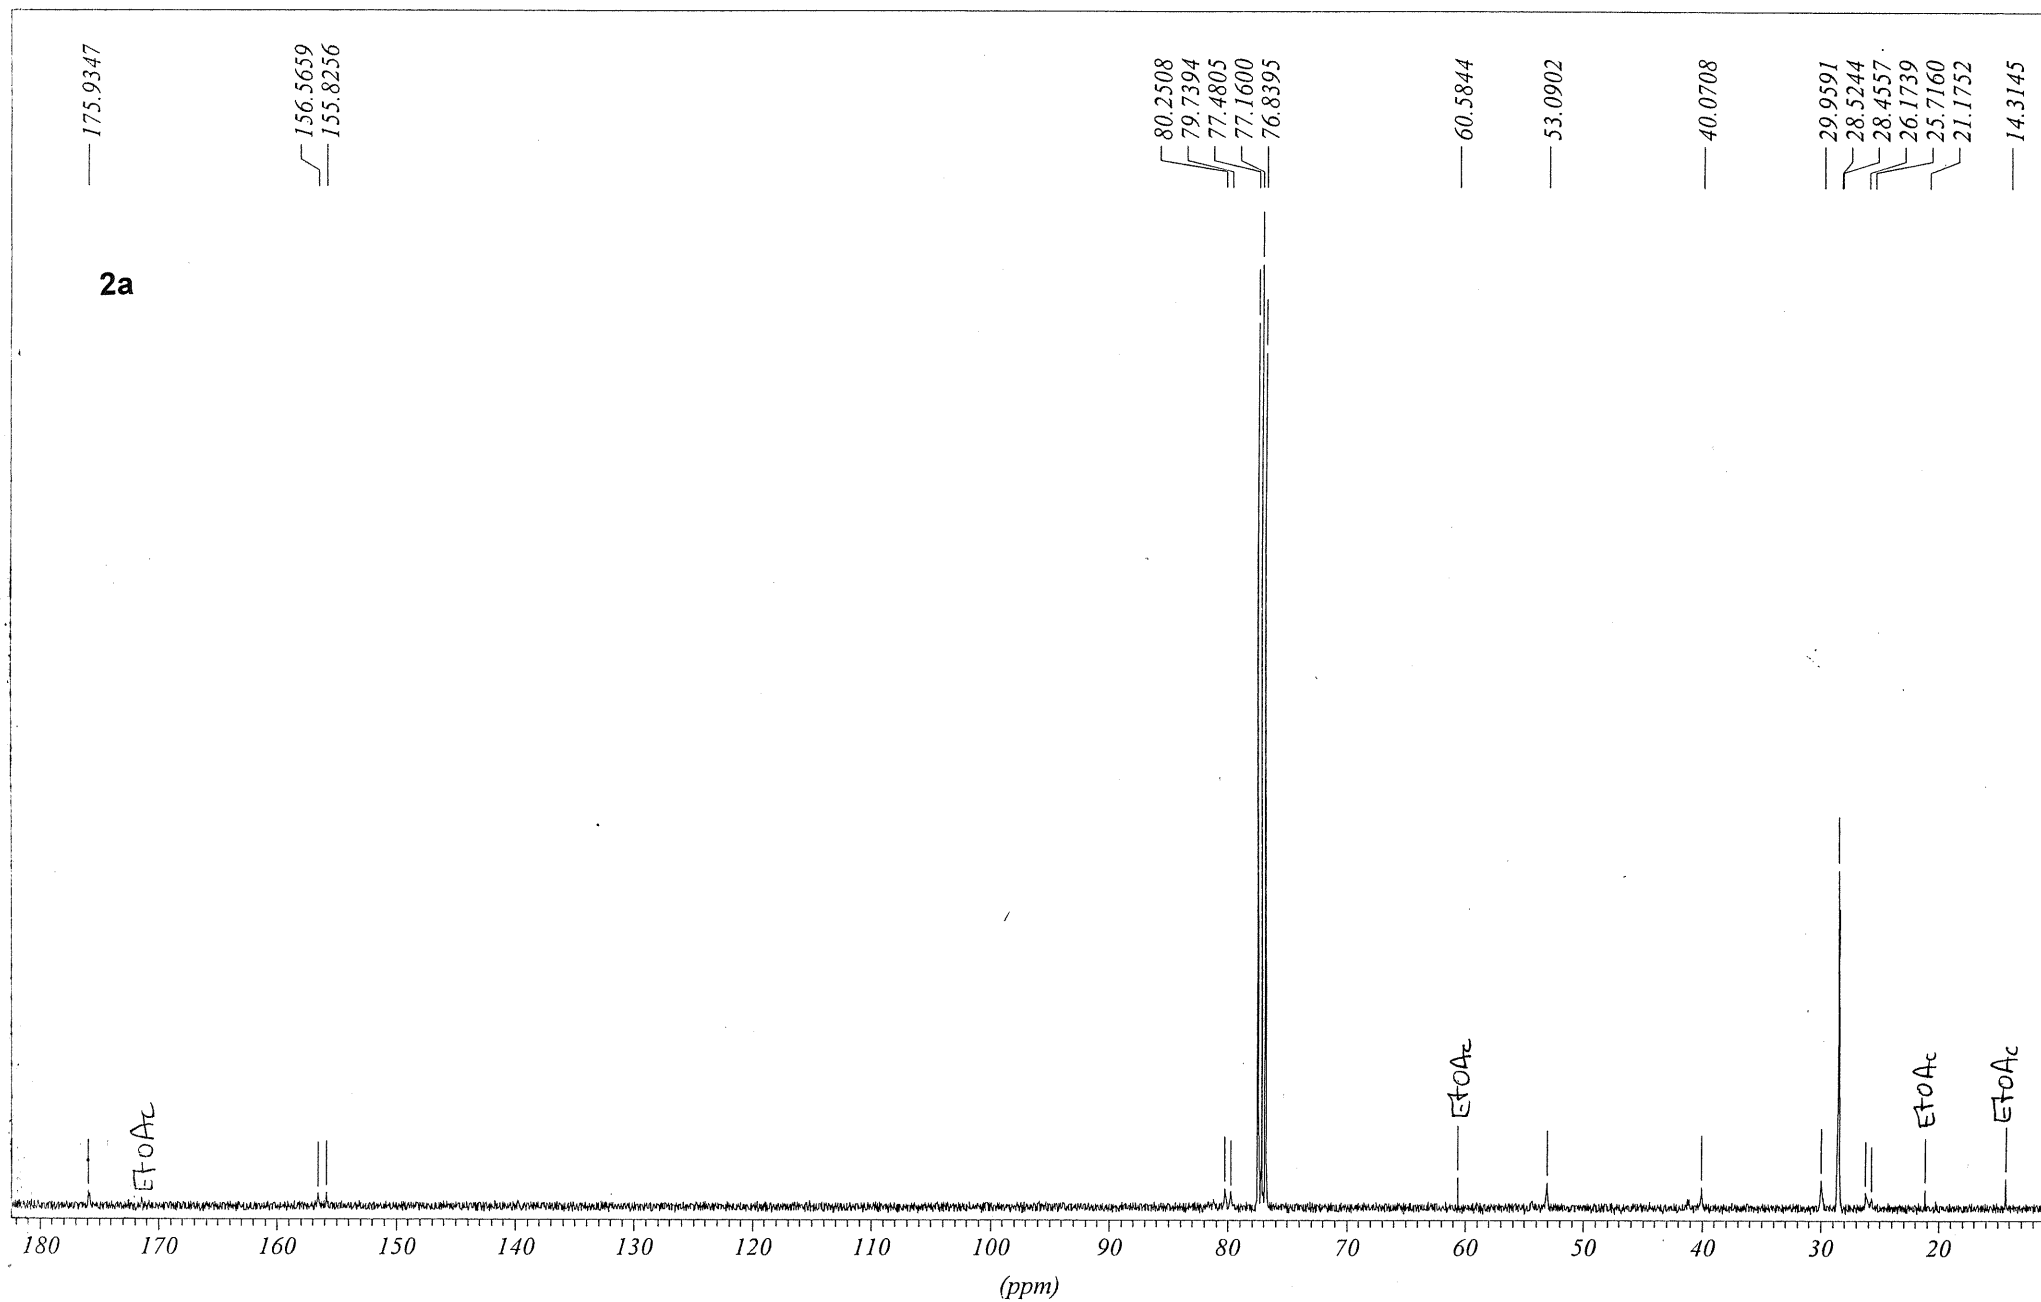

Data for (2S)-2,5-bis({[(*tert*-butoxy)carbonyl]amino})pentanoic acid (2b).

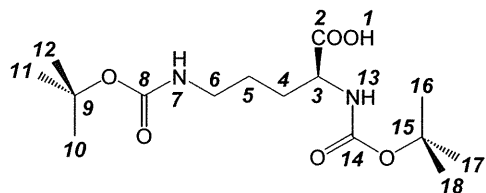

**<sup>1</sup>H NMR** (CDCl<sub>3</sub>, 400 MHz) δ<sub>H</sub> 7.57 (1H, br s, H-1), 5.27 (1H, d, <sup>3</sup>J<sub>H-H</sub> = 6.72 Hz, H-13), 4.81 (1H, br s, H-7), 4.32 (1H, br s, H-3), 3.14-3.11 (2H, br m, H-6), 1.87 (1H, br s, H-4), 1.72-1.63 (1H, m, H-4), 1.61-1.51 (2H, m, H-5), 1.43 (18H, s, H-10, 11, 12, 16, 17, 18).

**<sup>13</sup>C NMR** (CDCl<sub>3</sub>, 100 MHz) δ<sub>C</sub> 175.87 (C=O, C-2), 156.44 (C=O, C-14), 155.80 (C=O, C-8), 80.11 (4°-C, C-15), 79.57 (4°-C, C-9), 53.09 (CH, C-3), 40.06 (CH<sub>2</sub>, C-6), 29.88 (CH<sub>2</sub>, C-4), 28.46 (CH<sub>3</sub>, C-16, 17, 18), 28.40 (CH<sub>3</sub>, C-10, 11, 12), 25.98 (CH<sub>2</sub>, C-5).

k2981sjm: DBL-Ornithine [SJM-22-06-10]

Acquisition Freq. = 399.785 MHz

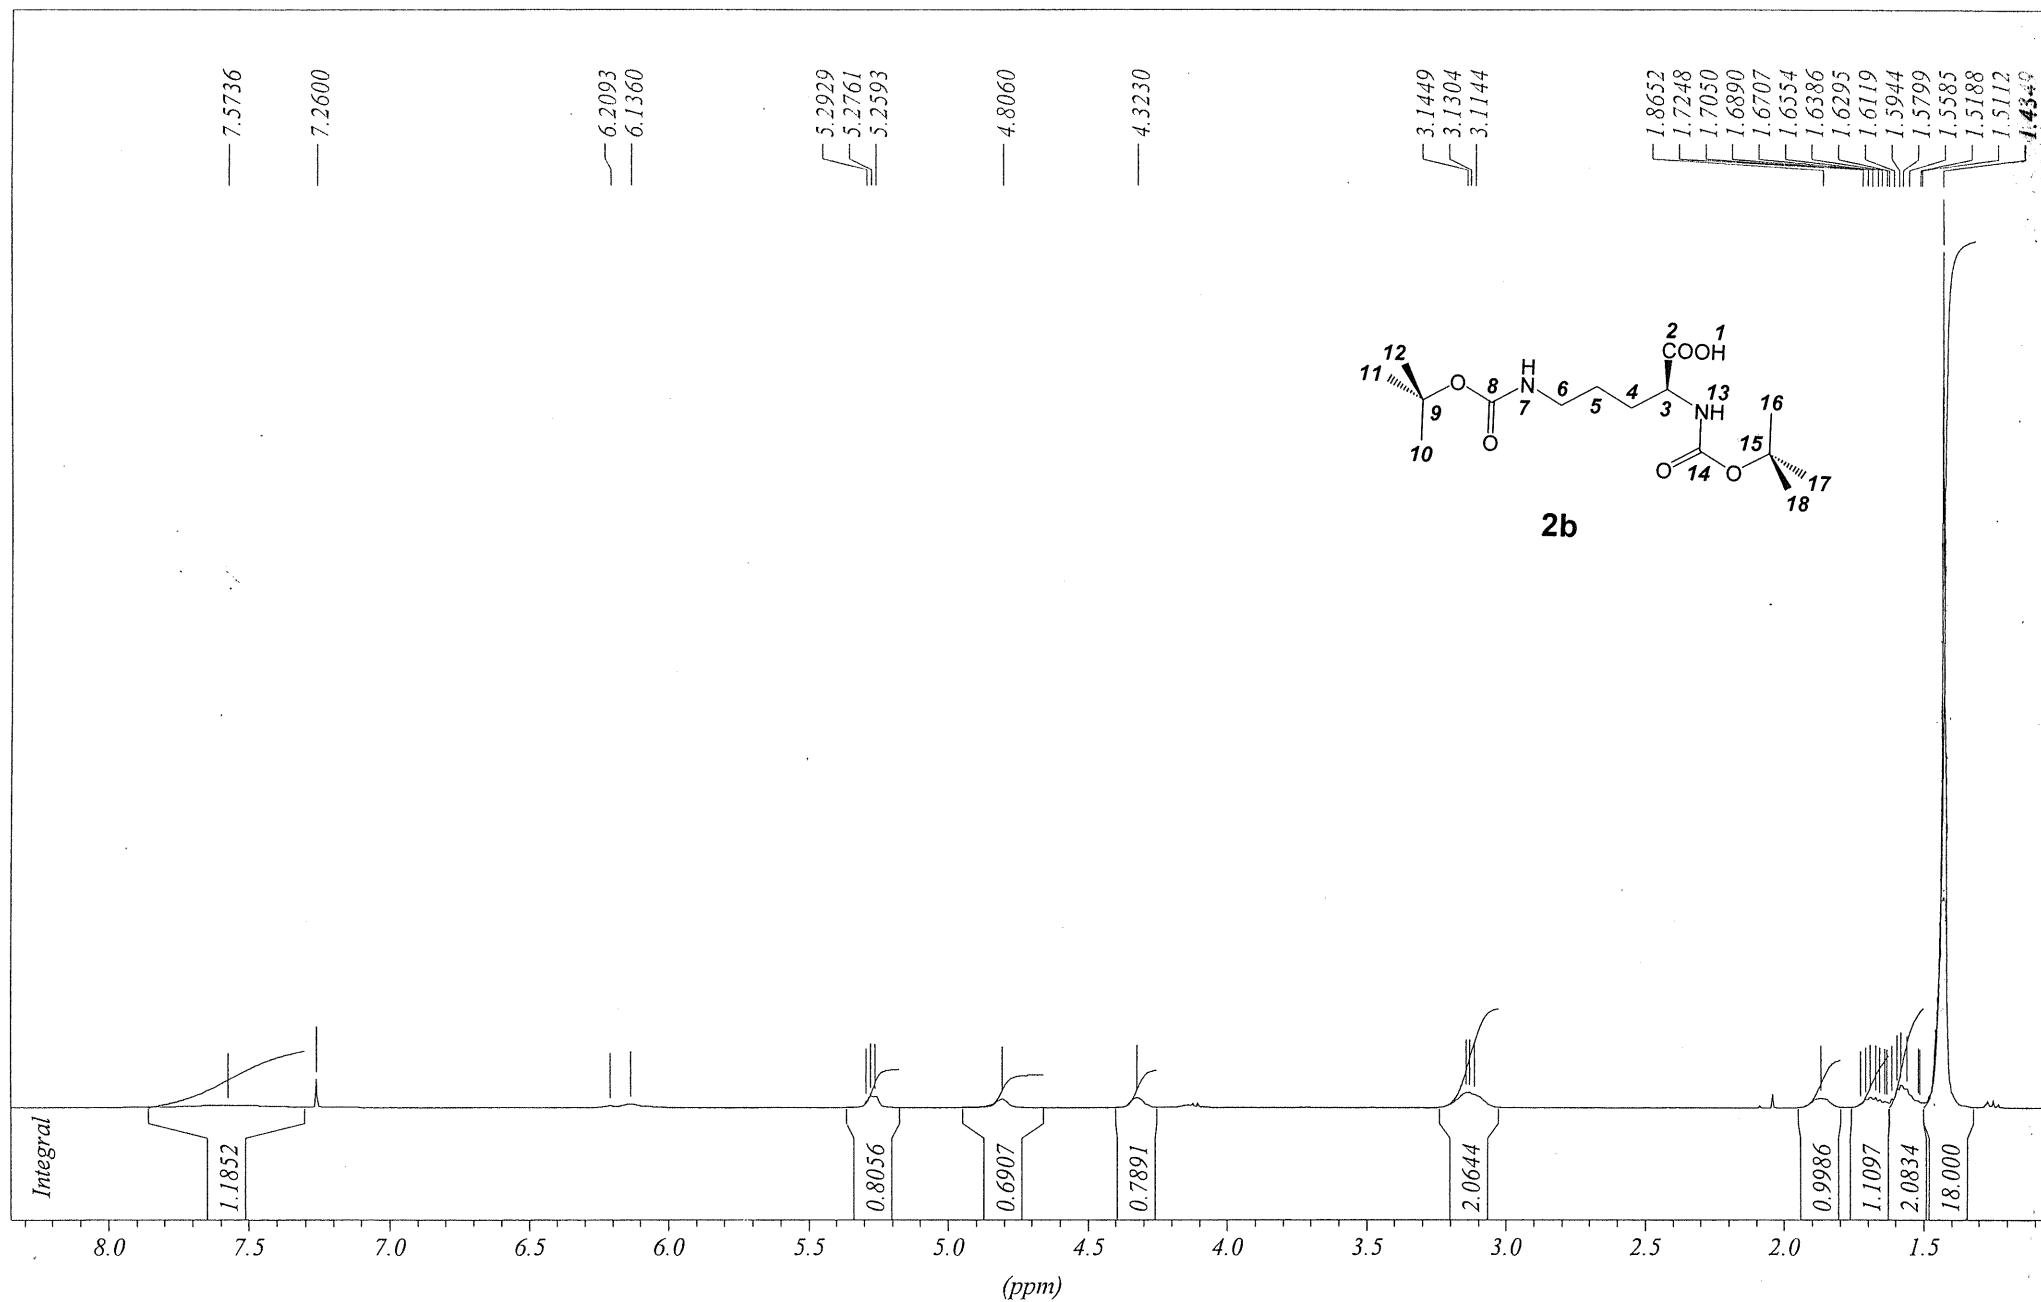

d0363sjm: DBL-Ornithine [SJM-22-06-10]

Acquisition Freq. = 100.535 MHz

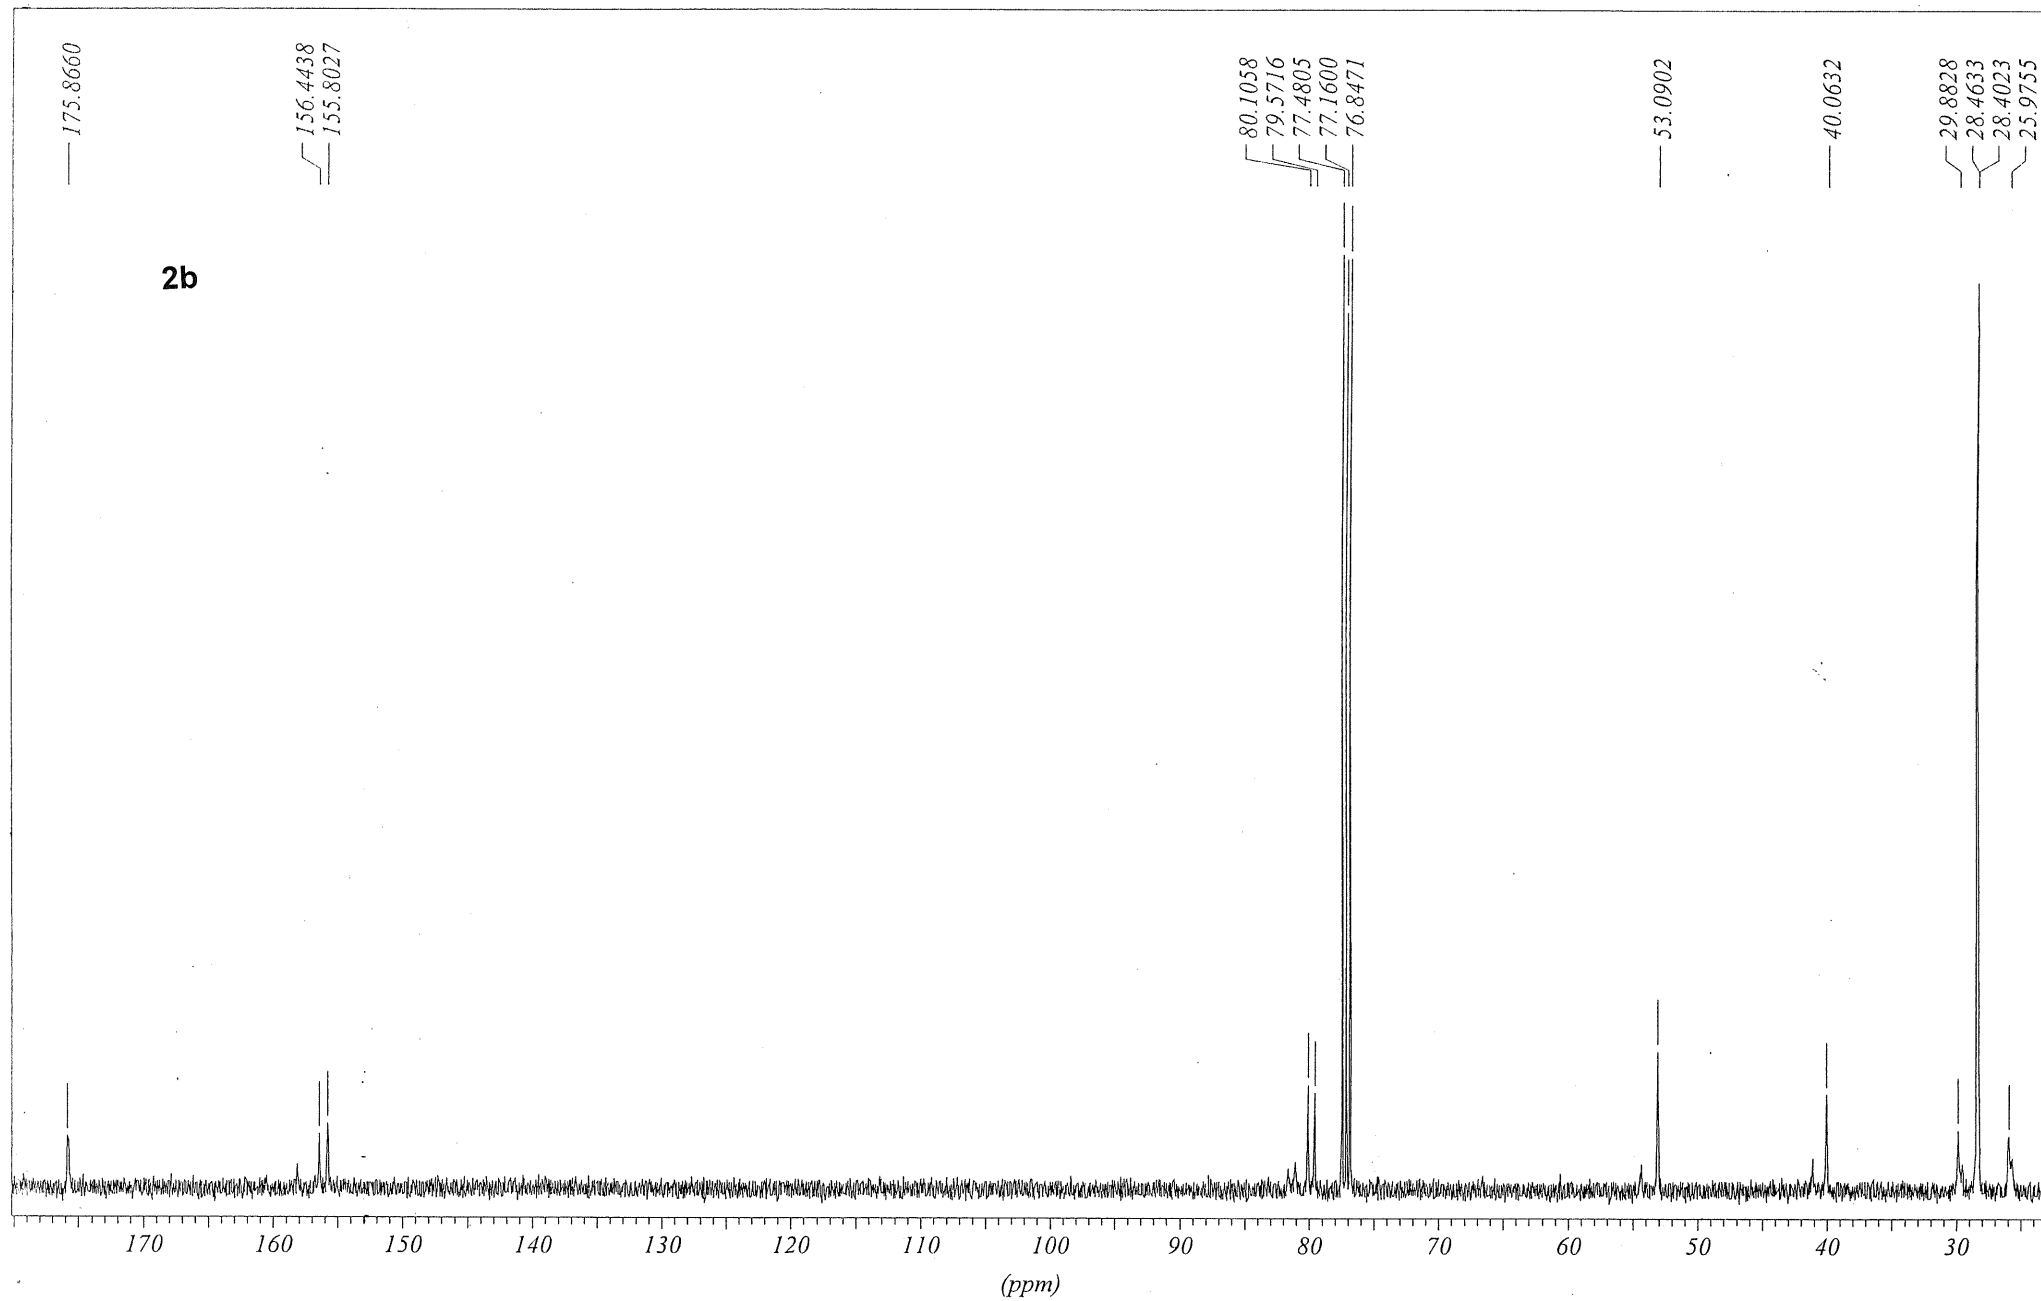

Data for (2S)-2, 6-bis({[(*tert*-butoxy)carbonyl]amino})hexanoic acid (**2c**).

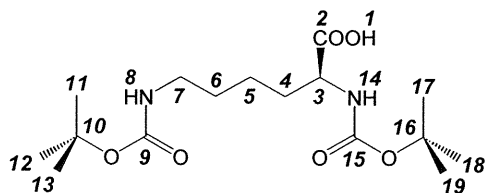

<sup>1</sup>H NMR (CDCl<sub>3</sub>, 400 MHz) δ<sub>H</sub> 5.27 (1H, br s, H-**14**), 4.68 (1H, br s, H-**8**), 4.29 (1H, br s, H-**3**), 3.12-3.11 (2H, br m, H-**7**), 1.84 (1H, br s, H-**4**), 1.73-1.71 (1H, br m, H-**4**), 1.50 (2H, br s, H-**5**), 1.44 (20H, s, H-**6**, **11**, **12**, **13**, **17**, **18**, **19**).

<sup>13</sup>C NMR (CDCl<sub>3</sub>, 100 MHz) δ<sub>C</sub> 176.37 (C=O, C-**2**), 156.44 (C=O, C-**15**), 155.96 (C=O, C-**9**), 80.14 (4°-C, C-**16**), 79.49 (4°-C, C-**10**), 53.34 (CH, C-**3**), 40.21 (CH<sub>2</sub>, C-**7**), 32.13 (CH<sub>2</sub>, C-**4**), 29.62 (CH<sub>2</sub>, C-**6**), 28.52 (CH<sub>3</sub>, C-**17**, **18**, **19**), 28.46 (CH<sub>3</sub>, C-**11**, **12**, **13**), 22.51 (CH<sub>2</sub>, C-**5**).

k2997sjm: DBL-Lysine [SJM-23-03-10]

Acquisition Freq. = 399.785 MHz

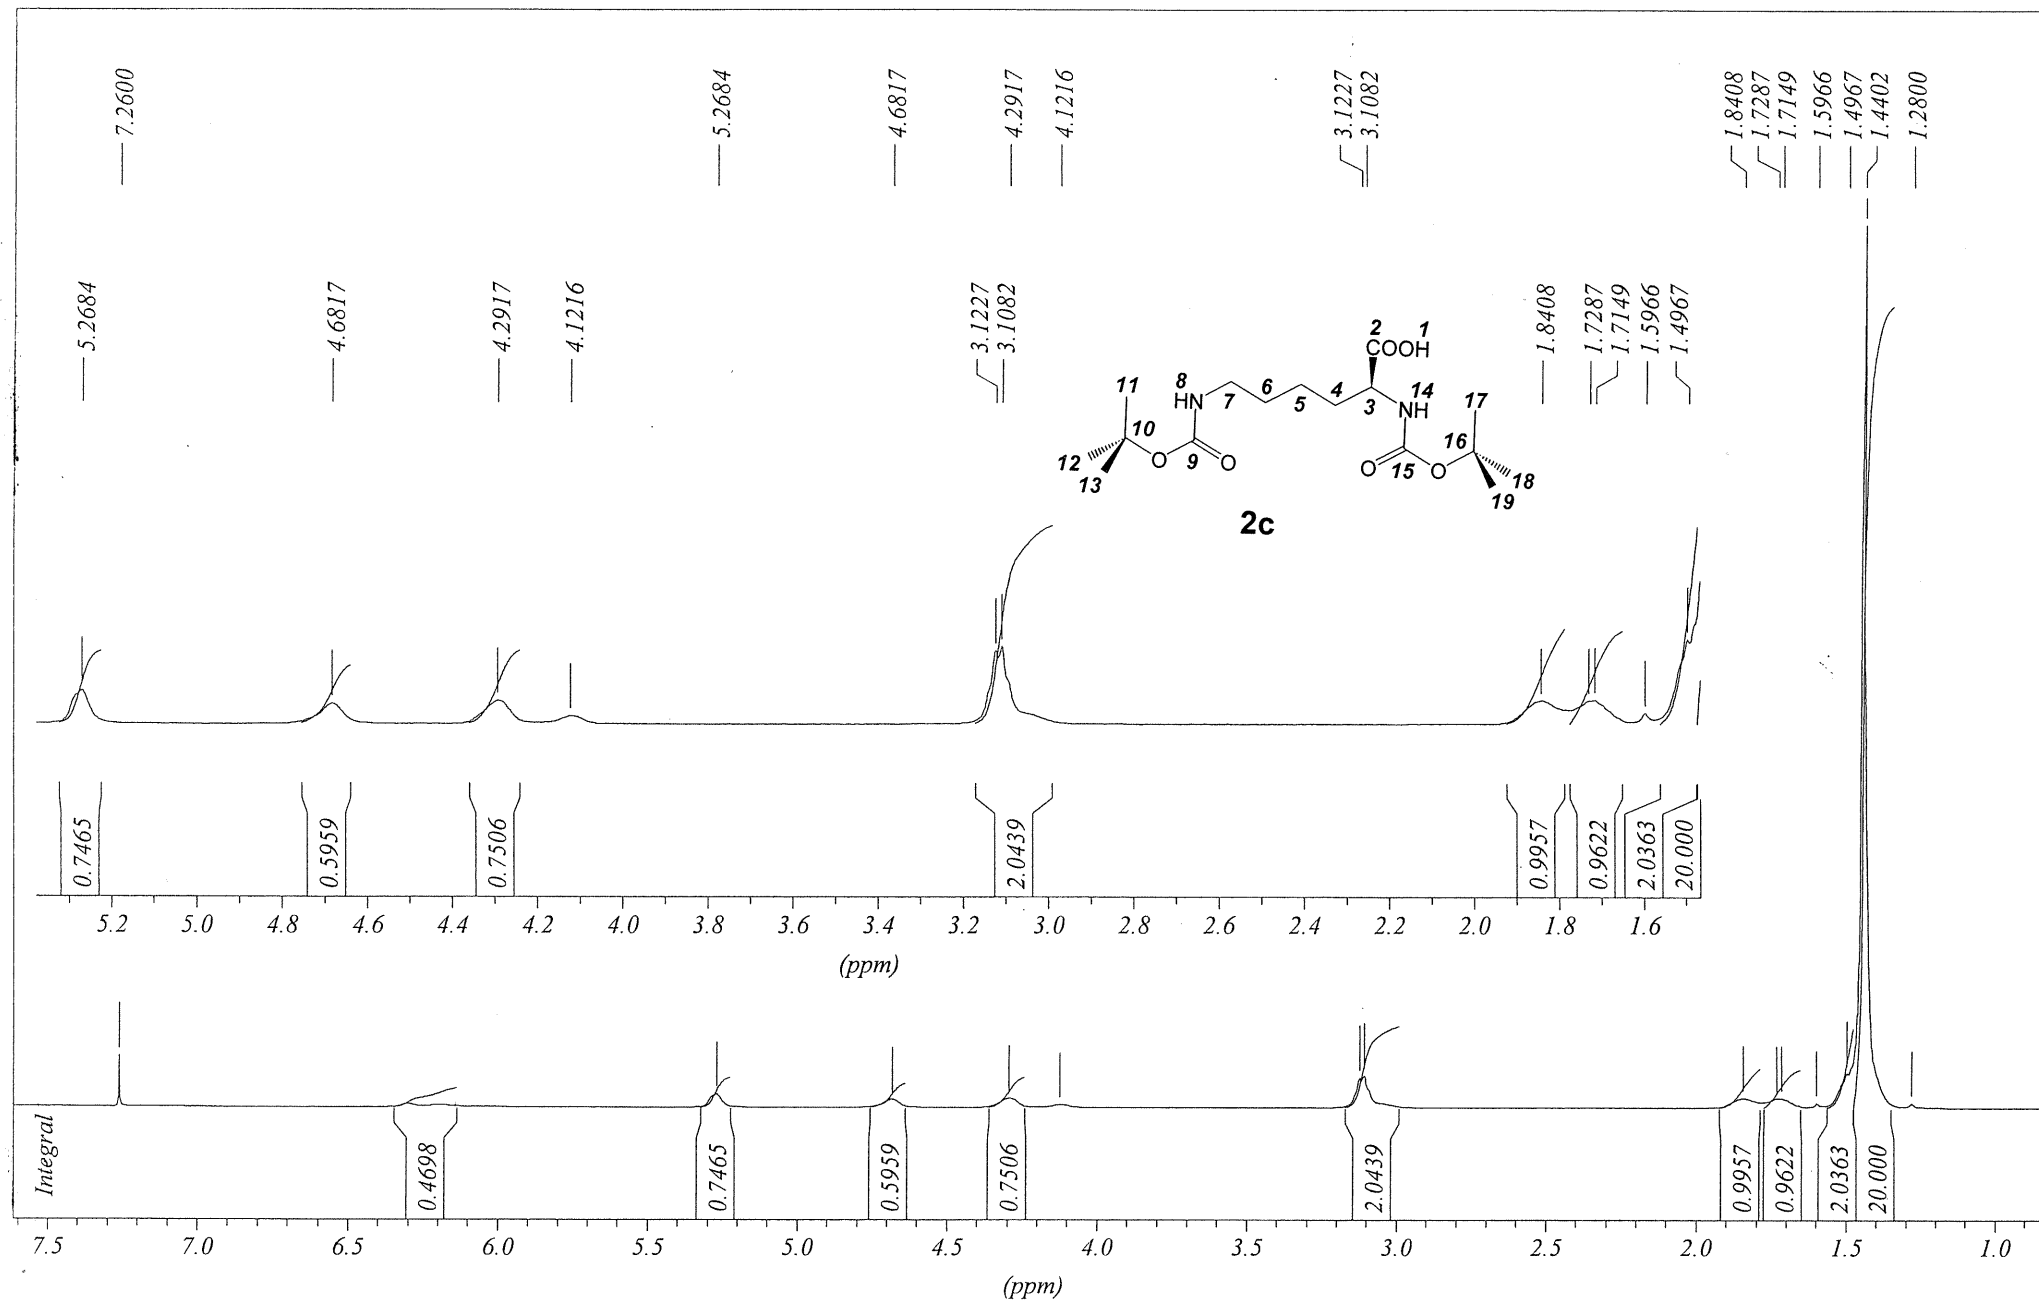



d0942sjm: DBL-Lysine [SJM-23-03-10]

Acquisition Freq. = 100.535 MHz

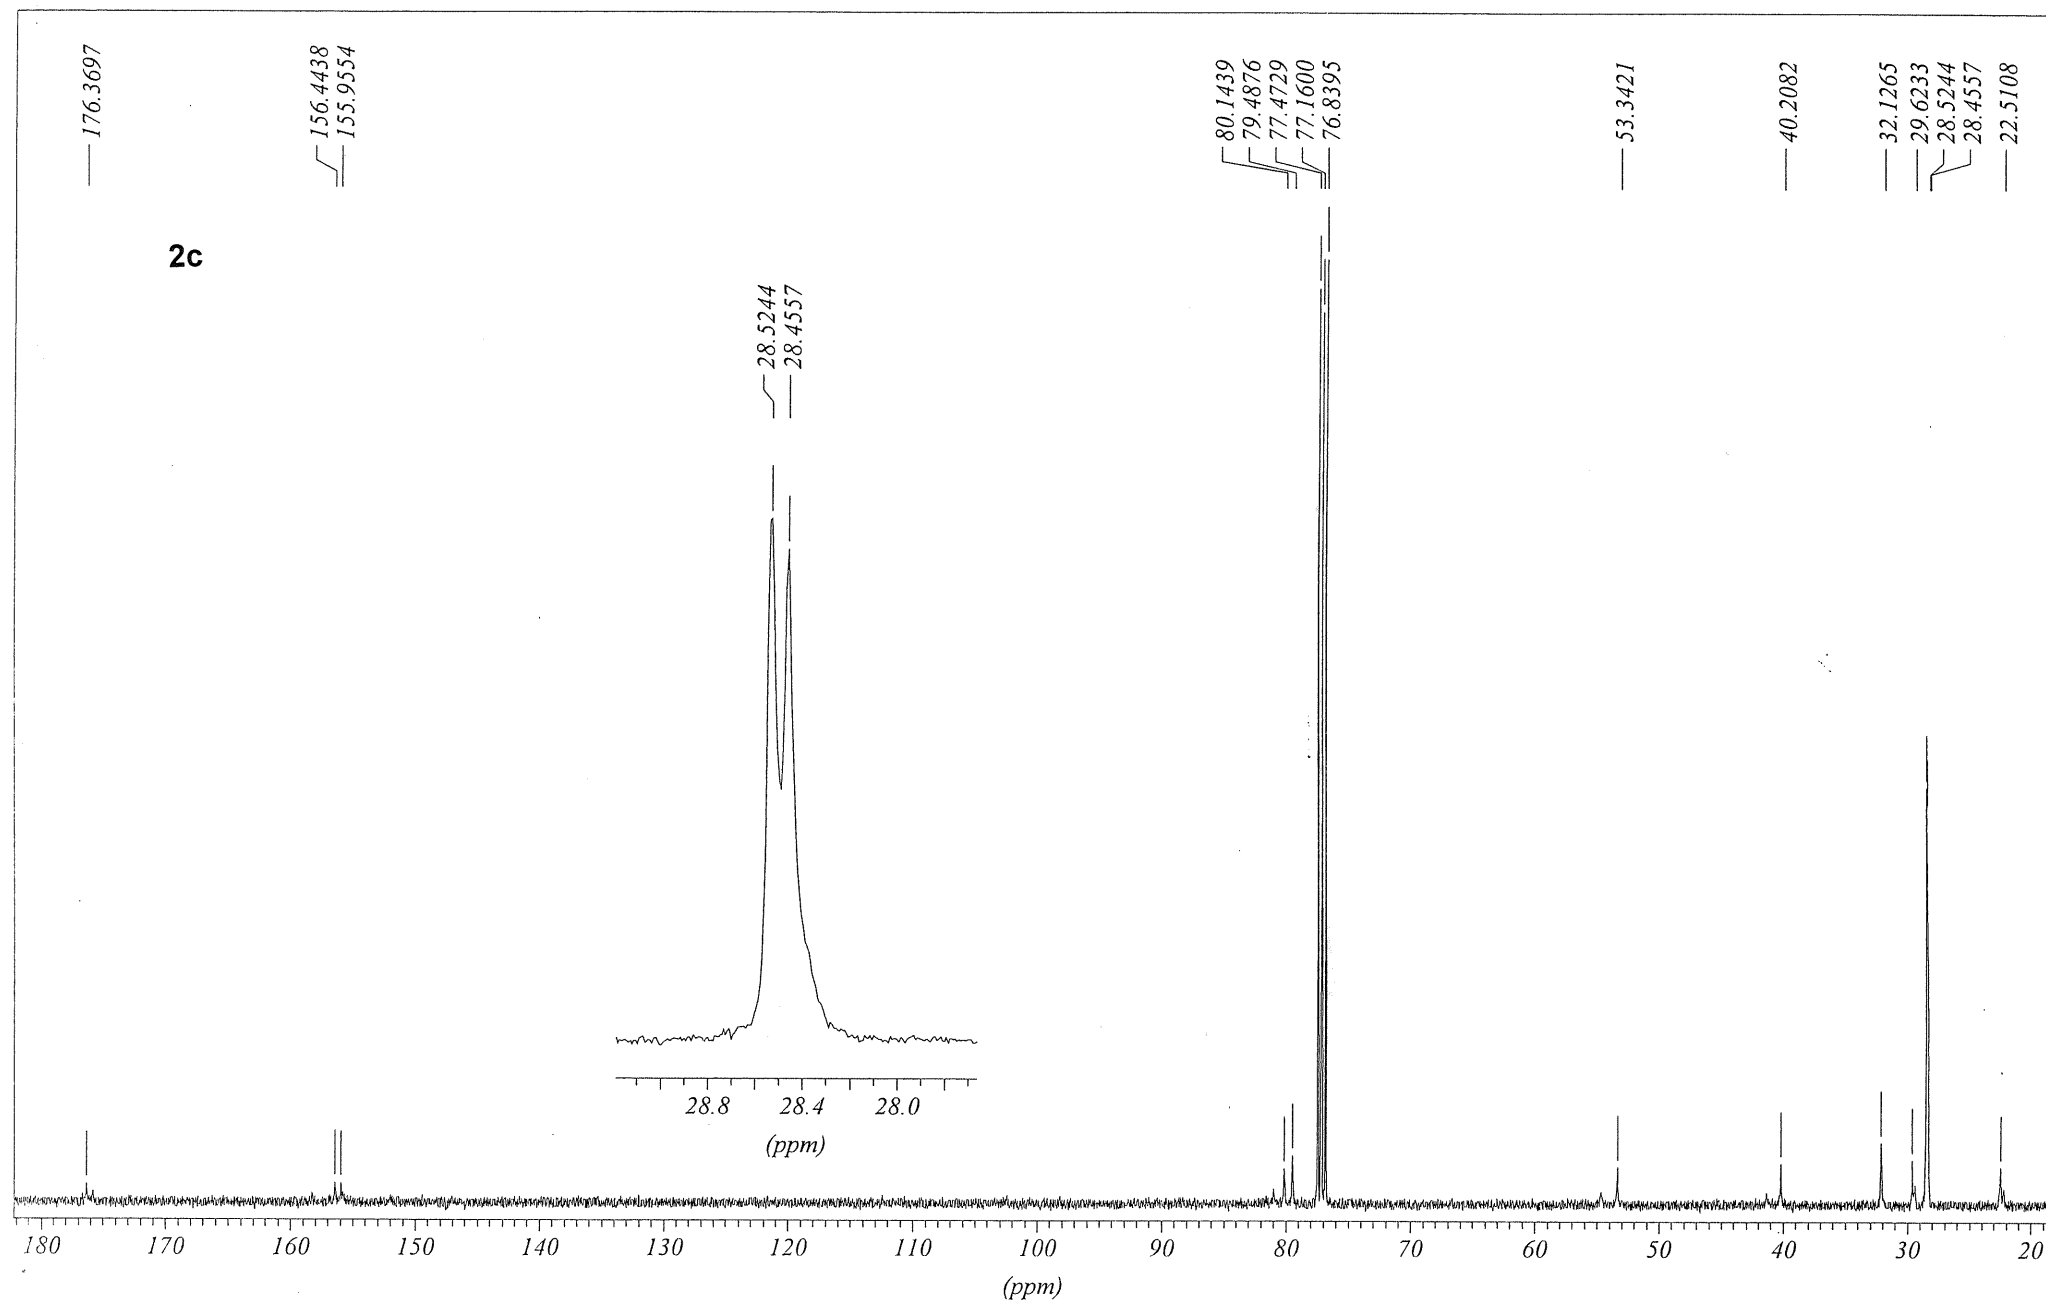

Data for Methyl 7-{4-[(2*R*)-2,5-bis({[(*tert*-butoxy)carbonyl]amino})pentanoyl]piperazin-1-yl}-1-cyclopropyl-6-fluoro-4-oxo-1,4-dihydroquinoline-3-carboxylate (5a).

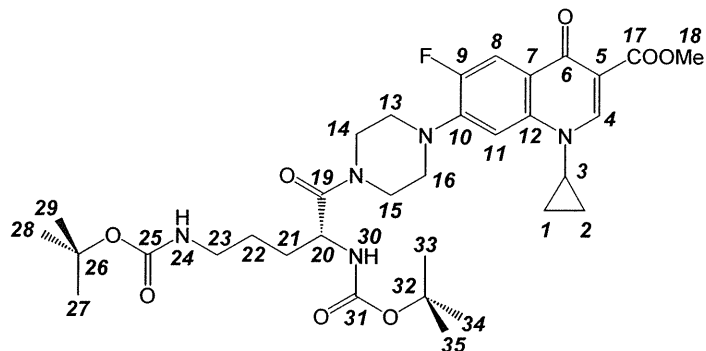

$^1\text{H NMR}$  ( $\text{CDCl}_3$ , 400 MHz)  $\delta_{\text{H}}$  8.55 (1H, s, H-4), 8.06 (1H, d,  $^3J_{\text{H-F}} = 13.1$  Hz, H-8), 7.27 (1H, d,  $^4J_{\text{H-F}} = 6.12$  Hz, H-11), 5.41 (1H, d,  $^3J_{\text{H-H}} = 8.56$  Hz, H-30), 4.67-4.64 (1H, m, H-20), 4.62 (1H, br s, H-24), 3.98-3.95 (1H, m, H-13/16), 3.91 (3H, s, H-18), 3.84-3.81 (1H, m, H-13/16), 3.75-3.66 (2H, m, H-13/16), 3.45-3.40 (1H, m, H-3), 3.27-3.11 (6H, m, H-14, 15, 23), 1.73-1.71 (2H, br m, H-21), 1.57-1.57 (2H, br m, H-22), 1.43 (9H, s, H-33, 34, 35), 1.41 (9H, s, H-27, 28, 29), 1.36-1.32 (2H, m, H-1/2), 1.16-1.12 (2H, m, H-1/2).

$^{13}\text{C NMR}$  ( $\text{CDCl}_3$ , 100 MHz)  $\delta_{\text{C}}$  173.07 (C=O, C-6), 170.80 (C=O, C-19), 166.33 (C=O, C-17), 156.15 (C=O, C-31), 155.66 (C=O, C-25), 153.39 (*ipso*-Ar, d,  $^1J_{\text{C-F}} = 249$  Hz, C-9), 148.56 (CH, C-4), 143.99 (*ipso*-Ar, d,  $^2J_{\text{C-F}} = 10.7$  Hz, C-10), 138.03 (*ipso*-Ar, C-5), 123.63 (*ipso*-Ar, d,  $^3J_{\text{C-F}} = 6.90$  Hz, C-7), 113.53 (CH, d,  $^2J_{\text{C-F}} = 23.0$  Hz, C-8), 110.18 (*ipso*-Ar, C-12), 105.34 (CH, C-11), 79.94 ( $4^\circ$ -C, C-32), 79.34 ( $4^\circ$ -C, C-26), 52.16 ( $\text{CH}_3$ , C-18), 50.36 ( $\text{CH}_2$ , C-13/16), 49.86 ( $\text{CH}_2$ , C-13/16), 49.64 (CH, C-20), 45.51 ( $\text{CH}_2$ , C-14, 15), 41.99 ( $\text{CH}_2$ , C-23), 34.67 (CH, C-3), 30.78 ( $\text{CH}_2$ , C-21), 28.49 ( $\text{CH}_3$ , C-33, 34, 35), 28.43 ( $\text{CH}_3$ , C-27, 28, 29), 25.94 ( $\text{CH}_2$ , C-22), 8.25 ( $\text{CH}_2$ , C-1, 2).

k2364sjm: DBD-Orn-Cpf-Me [SJM-27-04-10-B]

Acquisition Freq. = 399.785 MHz

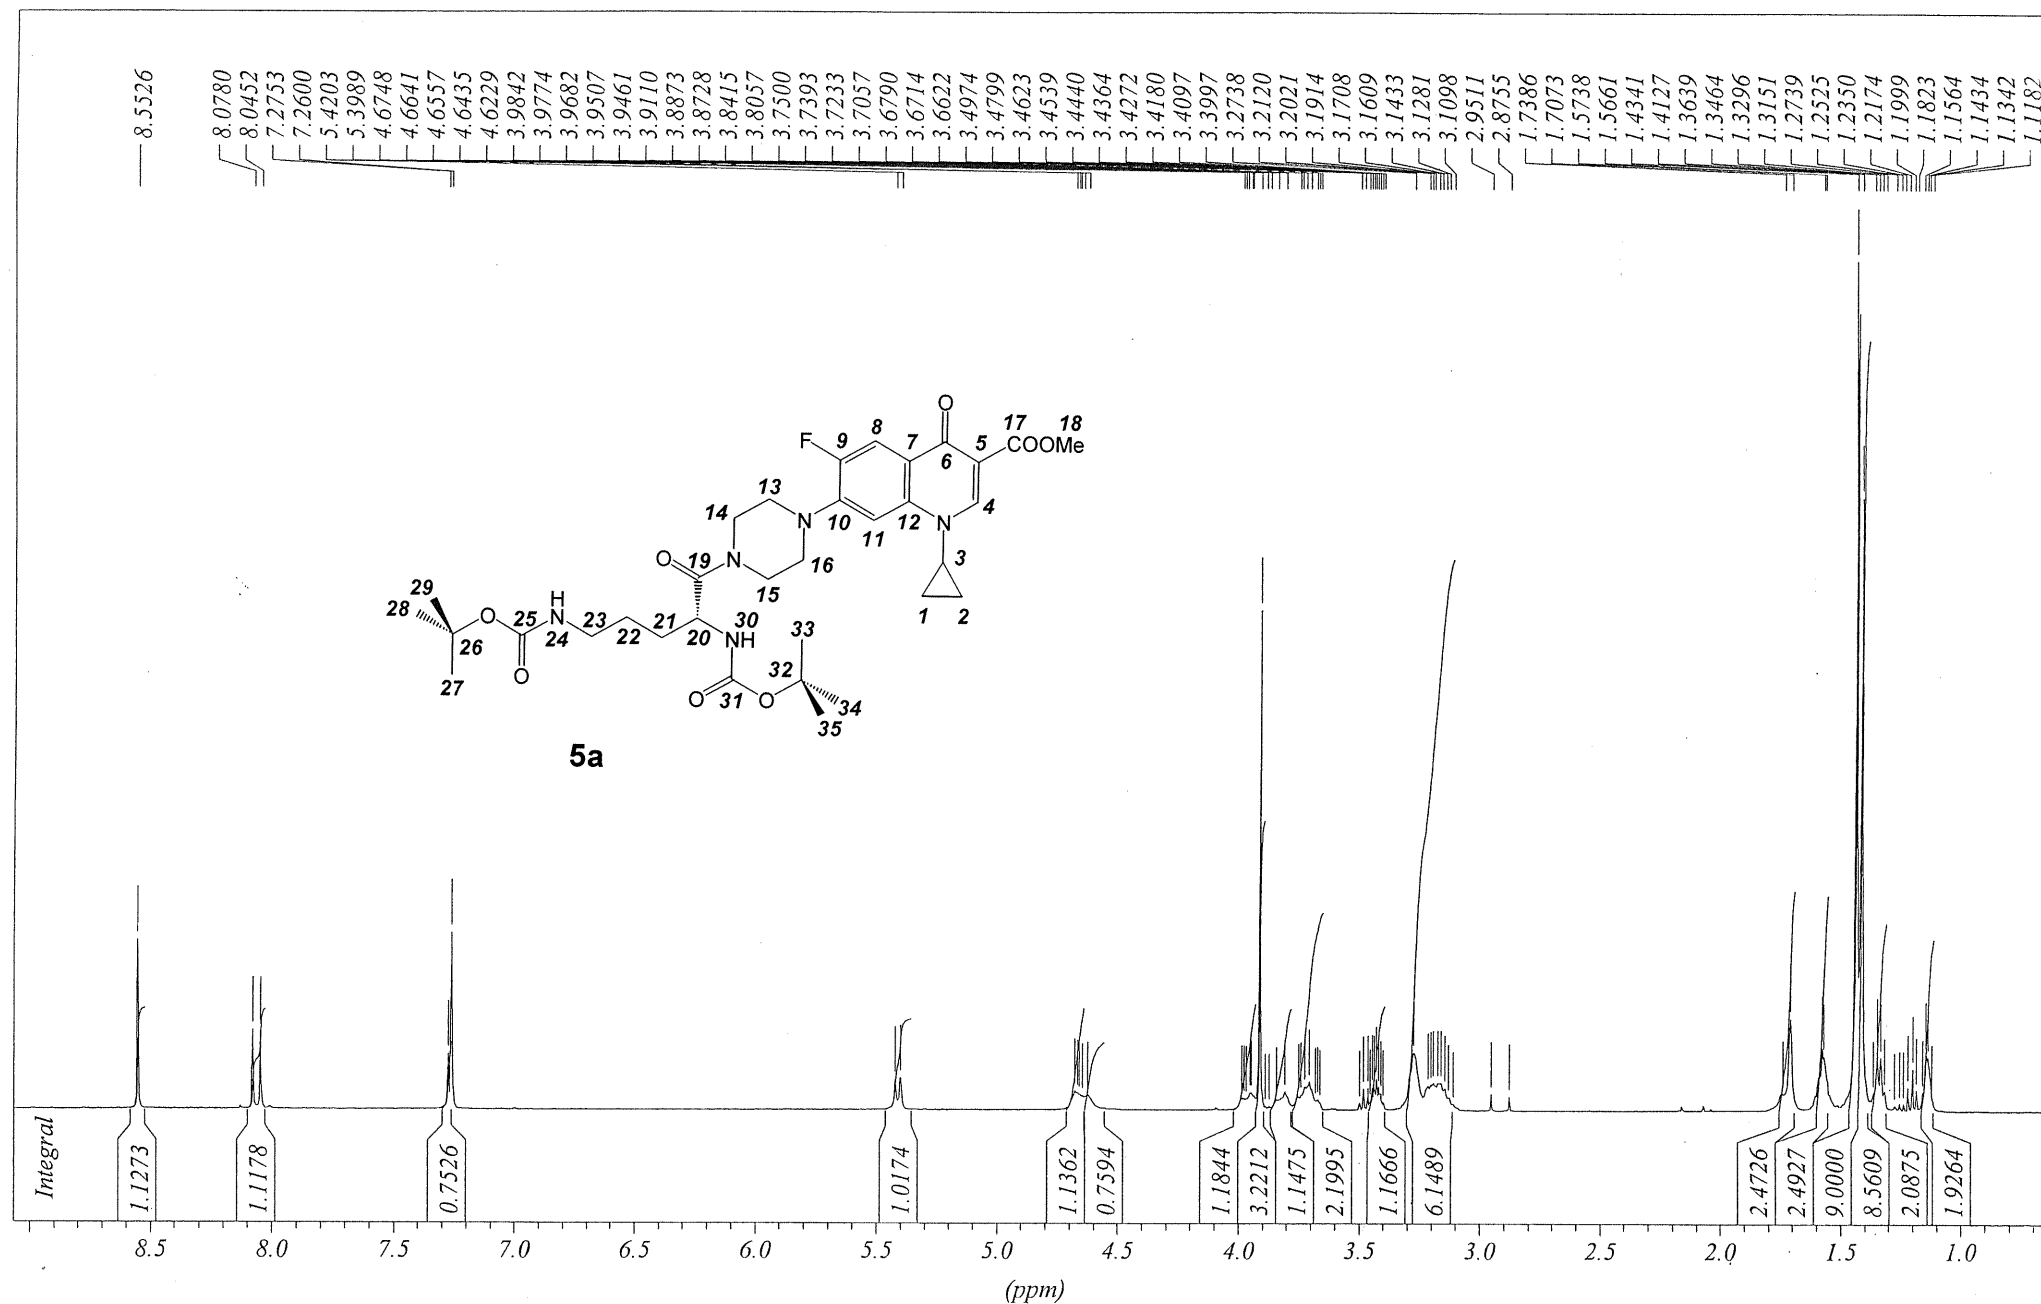

k5189sjm: DBD-Orn-Cpf-Me [SJM-27-04-10-B]

Acquisition Freq. = 100.535 MHz

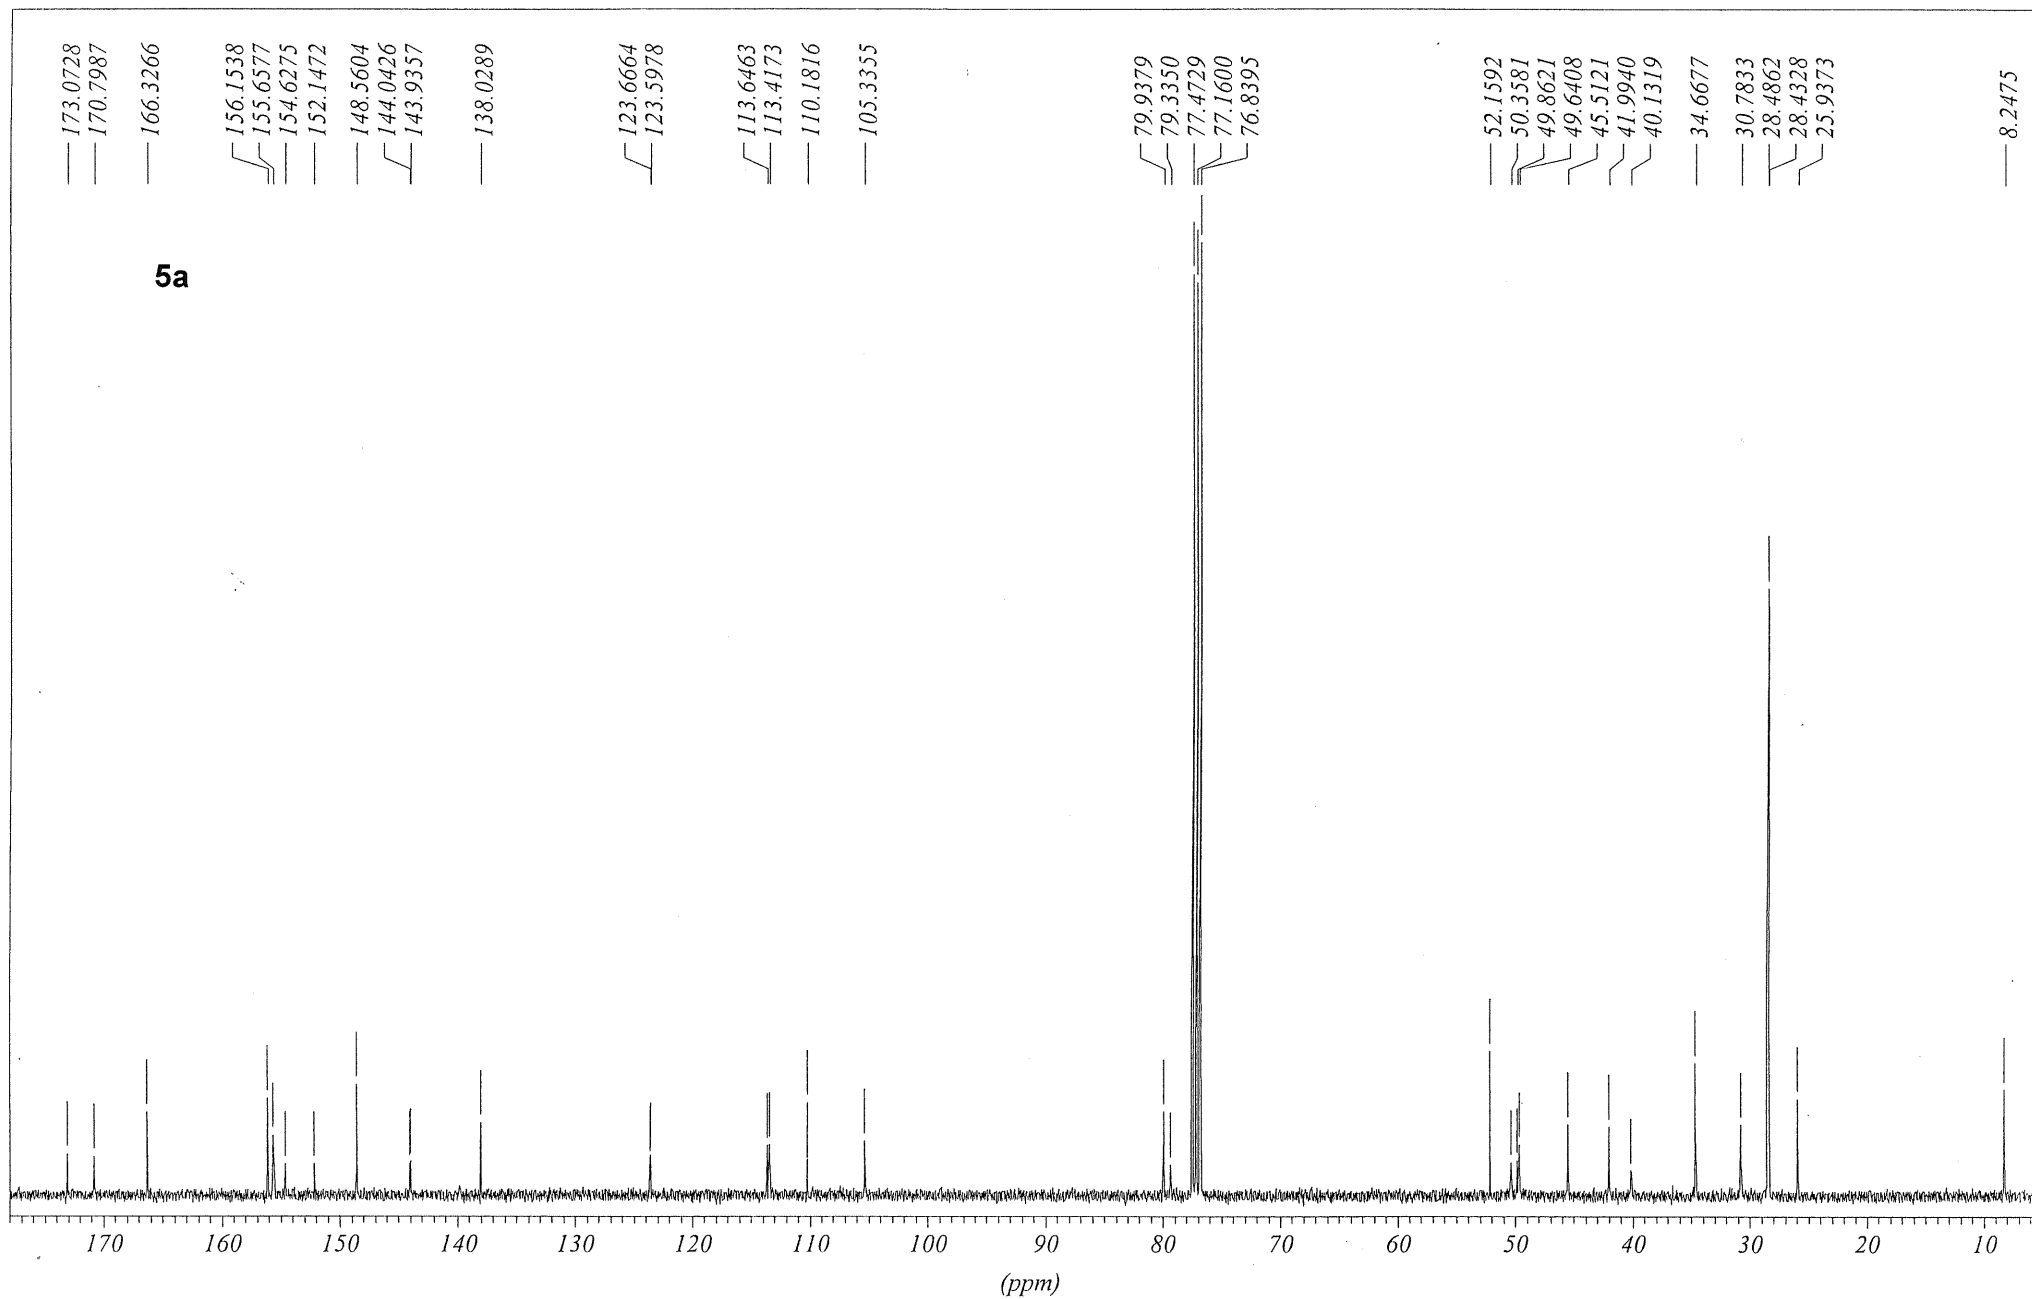

Data for methyl 7-{4-[(2S)-2,5-bis({[(*tert*-butoxy)carbonyl]amino})pentanoyl]piperazin-1-yl}-1-cyclopropyl-6-fluoro-4-oxo-1,4-dihydroquinoline-3-carboxylate (**5b**).

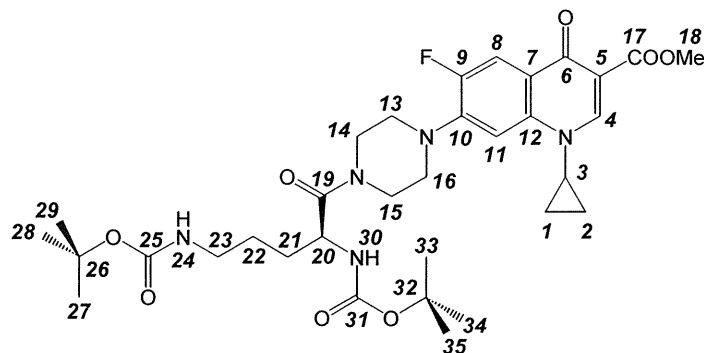

$^1\text{H NMR}$  ( $\text{CDCl}_3$ , 400 MHz)  $\delta_{\text{H}}$  8.52 (1H, s, H-**4**), 8.01 (1H, d,  $^3J_{\text{H-F}} = 13.1$  Hz, H-**8**), 7.25 (1H, d,  $^4J_{\text{H-F}} = 7.24$  Hz, H-**11**), 5.42 (1H, d,  $^3J_{\text{H-H}} = 8.60$  Hz, H-**30**), 4.65 (2H, br s, H-**20**, **24**), 3.97-3.93 (1H, m, H-**14/15**), 3.89 (3H, s, H-**18**), 3.83-3.80 (1H, br m, H-**14/15**), 3.74-3.66 (2H, br m, H-**14/15**), 3.45-3.40 (1H, m, H-**3**), 3.26-3.10 (6H, br m, H-**13**, **16**, **23**), 1.88 (1H, br s, H-**21**), 1.74-1.71 (1H, br m, H-**21**), 1.58-1.56 (2H, br m, H-**22**), 1.42 (9H, s, H-**33**, **34**, **35**), 1.40 (9H, s, H-**27**, **28**, **29**), 1.35-1.31 (2H, m, H-**1/2**), 1.15-1.11 (2H, m, H-**1/2**).

$^{13}\text{C NMR}$  ( $\text{CDCl}_3$ , 100 MHz)  $\delta_{\text{C}}$  173.07 (C=O, C-**6**), 170.80 (C=O, C-**19**), 166.44 (C=O, C-**17**), 156.14 (C=O, C-**31**), 155.66 (C=O, C-**25**), 153.42 (*ipso*-Ar, d,  $^1J_{\text{C-F}} = 249$  Hz, C-**9**), 148.59 (CH, C-**4**), 144.01 (*ipso*-Ar, d,  $^2J_{\text{C-F}} = 9.97$  Hz, C-**10**), 138.06 (*ipso*-Ar, C-**5**), 123.74 (*ipso*-Ar, d,  $^3J_{\text{C-F}} = 6.91$  Hz, C-**7**), 113.63 (CH, d,  $^2J_{\text{C-F}} = 22.2$  Hz, C-**8**), 110.29 (*ipso*-Ar, C-**12**), 105.31 (CH, C-**11**), 79.95 ( $4^\circ$ -C, C-**32**), 79.35 ( $4^\circ$ -C, C-**26**), 52.21 ( $\text{CH}_3$ , C-**18**), 50.37 ( $\text{CH}_2$ , C-**13/16**), 49.90 ( $\text{CH}_2$ , C-**23**), 49.66 (CH, C-**20**), 45.54 ( $\text{CH}_2$ , C-**14/15**), 42.01 ( $\text{CH}_2$ , C-**14/15**), 40.14 ( $\text{CH}_2$ , C-**13/16**), 34.66 (CH, C-**3**), 30.84 ( $\text{CH}_2$ , C-**21**), 28.50 ( $\text{CH}_3$ , C-**33**, **34**, **35**), 28.46 ( $\text{CH}_3$ , C-**27**, **28**, **29**), 25.98 ( $\text{CH}_2$ , C-**22**), 8.29 ( $\text{CH}_2$ , C-**1**, **2**).

d5552sjm: DBL-Orn-Cpf-Me [SJM-05-08-10]

Acquisition Freq. = 399.785 MHz

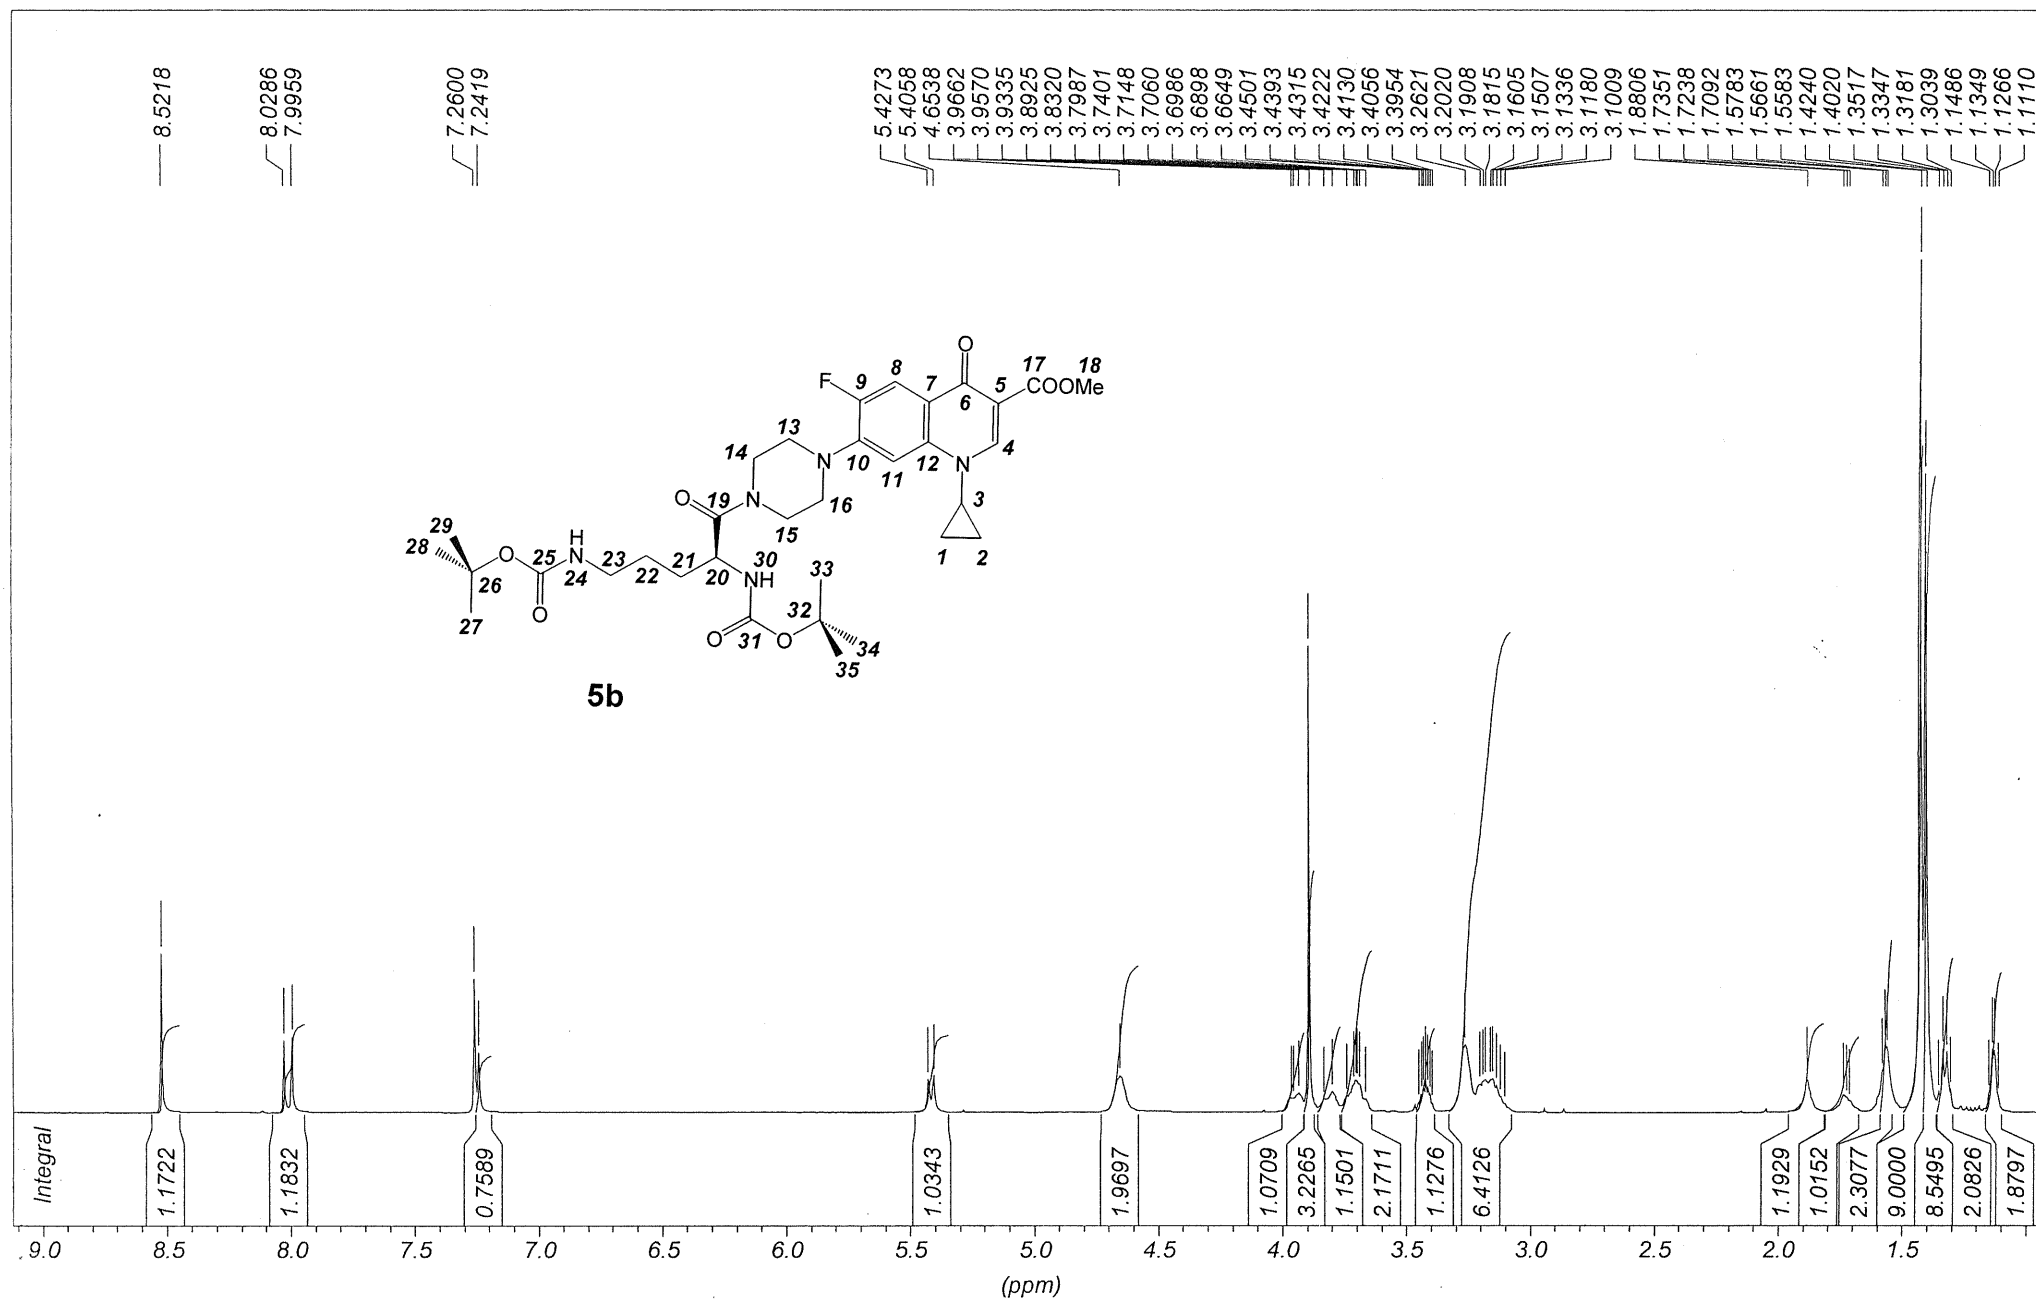

d5587sjm: DBL-Orn-Cpf-Me [SJM-05-08-10]

Acquisition Freq. = 399.785 MHz

5b

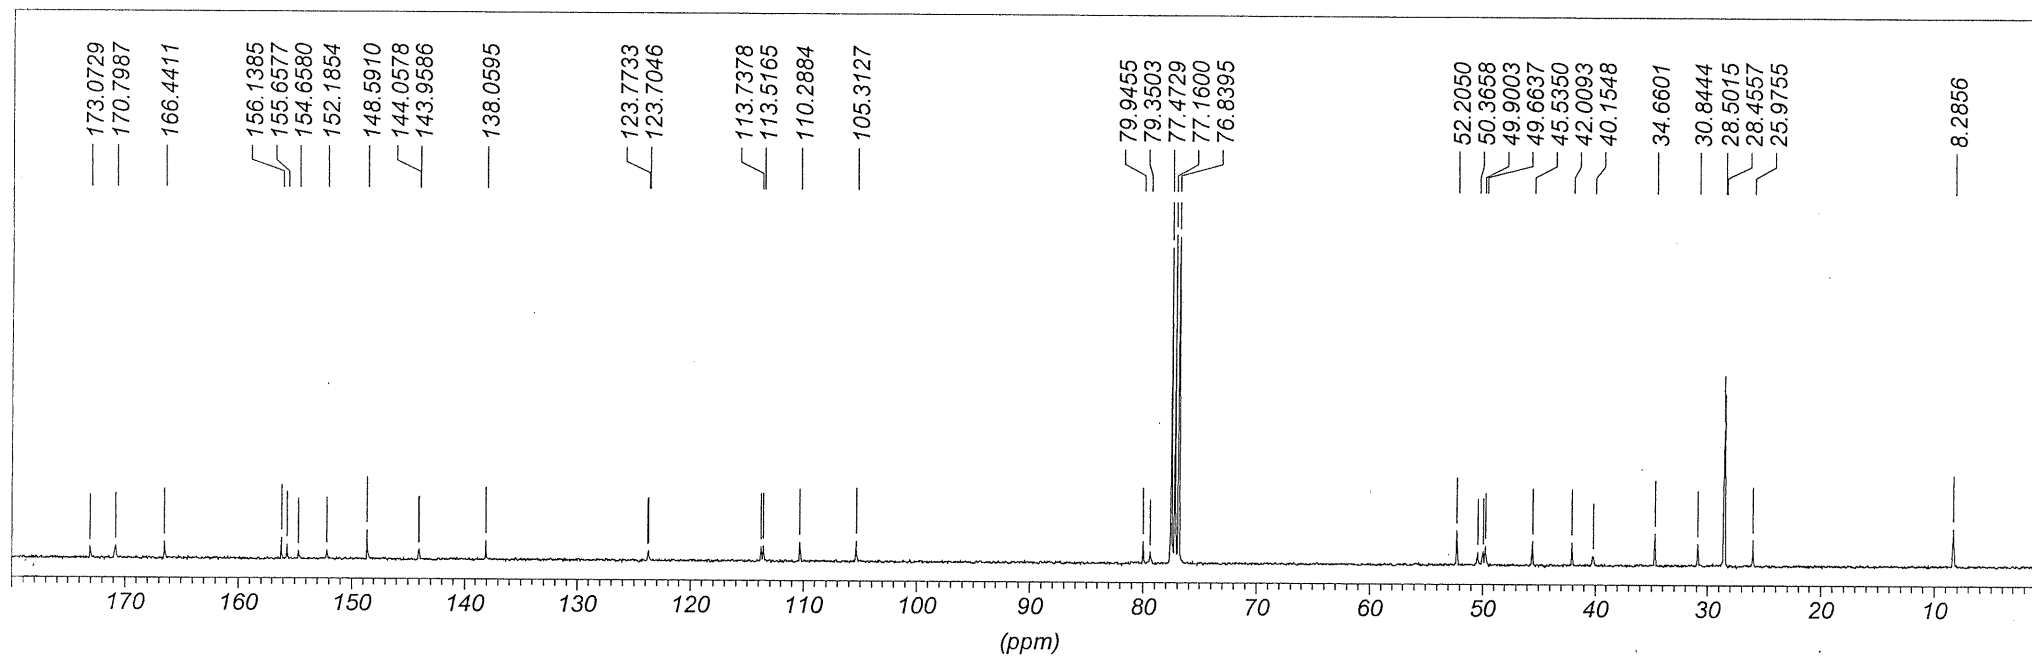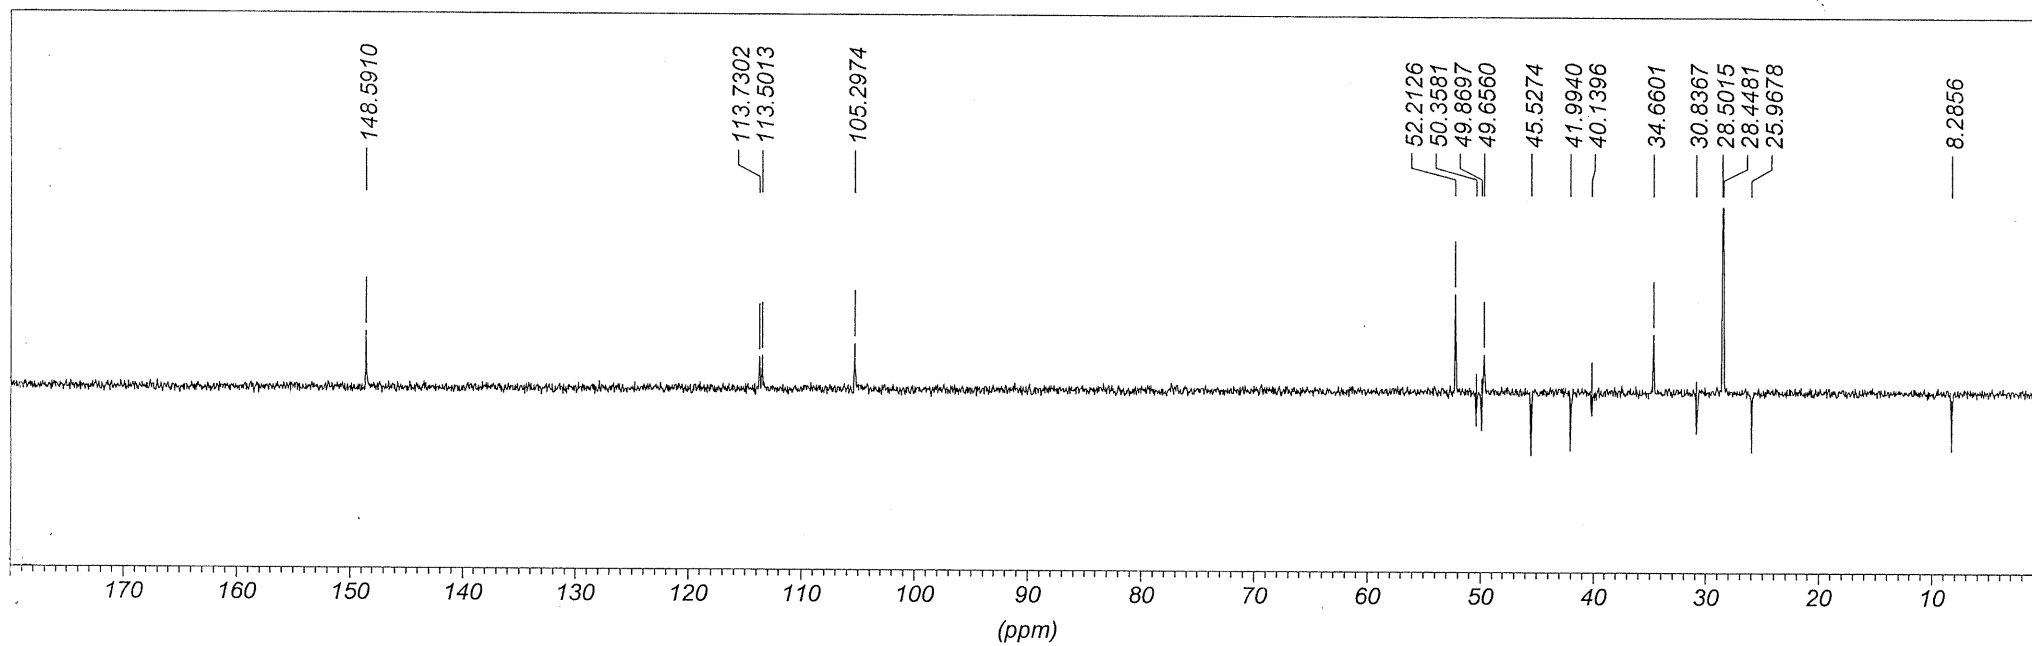

Data for methyl 7-{4-[(2S)-2,6-bis({[(*tert*-butoxy)carbonyl]amino})hexanoyl]piperazin-1-yl}-1-cyclopropyl-6-fluoro-4-oxo-1,4-dihydroquinoline-3-carboxylate (5c).

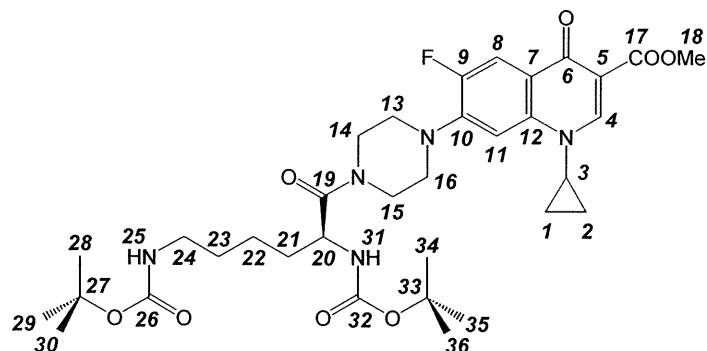

$^1\text{H NMR}$  ( $\text{CDCl}_3$ , 400 MHz)  $\delta_{\text{H}}$  8.49 (1H, s, H-4), 7.96 (1H, d,  $^3J_{\text{H-F}} = 13.1$  Hz, H-8), 7.24 (1H, d,  $^4J_{\text{H-F}} = 7.04$  Hz, H-11), 5.44 (1H, d,  $^3J_{\text{H-H}} = 8.52$  Hz, H-31), 4.68 (1H, br s, H-25), 4.63-4.58 (1H, m, H-20), 3.95-3.92 (1H, br m, H-13/16), 3.87 (3H, s, H-18), 3.80-3.77 (1H, br m, H-13/16), 3.70-3.69 (2H, br m, H-13/16), 3.44-3.39 (1H, m, H-3), 3.26-3.18 (4H, br m, H-14, 15), 3.16-3.03 (2H, br m, H-24), 1.72-1.66 (1H, m, H-21), 1.59-1.54 (1H, m, H-21), 1.54-1.46 (2H, m, H-22), 1.42 (11H, s, H-23, 34, 35, 36), 1.39 (9H, s, H-28, 29, 30), 1.32-1.29 (2H, m, H-1/2), 1.14-1.10 (2H, m, H-1/2).

$^{13}\text{C NMR}$  ( $\text{CDCl}_3$ , 100 MHz)  $\delta_{\text{C}}$  173.03 (C=O, C-6), 170.91 (C=O, C-19), 166.29 (C=O, C-17), 156.17 (C=O, C-32), 155.74 (C=O, C-26), 153.38 (*ipso*-Ar, d,  $^1J_{\text{C-F}} = 249$  Hz, C-9), 148.55 (CH, C-4), 143.99 (*ipso*-Ar, d,  $^2J_{\text{C-F}} = 10.7$  Hz, C-10), 138.01 (*ipso*-Ar, C-5), 123.59 (*ipso*-Ar, d,  $^3J_{\text{C-F}} = 6.91$  Hz, C-7), 113.47 (CH, d,  $^2J_{\text{C-F}} = 22.2$  Hz, C-8), 110.13 (*ipso*-Ar, C-12), 105.34 (CH, d,  $^3J_{\text{C-F}} = 2.30$  Hz, C-11), 79.88 ( $4^\circ$ -C, C-33), 79.17 ( $4^\circ$ -C, C-27), 52.13 ( $\text{CH}_3$ , C-18), 50.33 ( $\text{CH}_2$ , C-13/16), 49.87 ( $\text{CH}_2$ , C-12/15), 49.82 (CH, C-20), 45.48 ( $\text{CH}_2$ , C-14, 15), 41.94 ( $\text{CH}_2$ , C-24), 34.66 (CH, C-3), 33.21 ( $\text{CH}_2$ , C-21), 29.64 ( $\text{CH}_2$ , C-23), 28.49 ( $\text{CH}_3$ , C-34, 35, 36), 28.44 ( $\text{CH}_3$ , C-28, 29, 30), 22.43 ( $\text{CH}_2$ , C-22), 8.23 ( $\text{CH}_2$ , C-1, 2).



k5176sjm: DBL-Lys-Cpf-Me [SJM-20-04-10]

Acquisition Freq. = 399.785 MHz

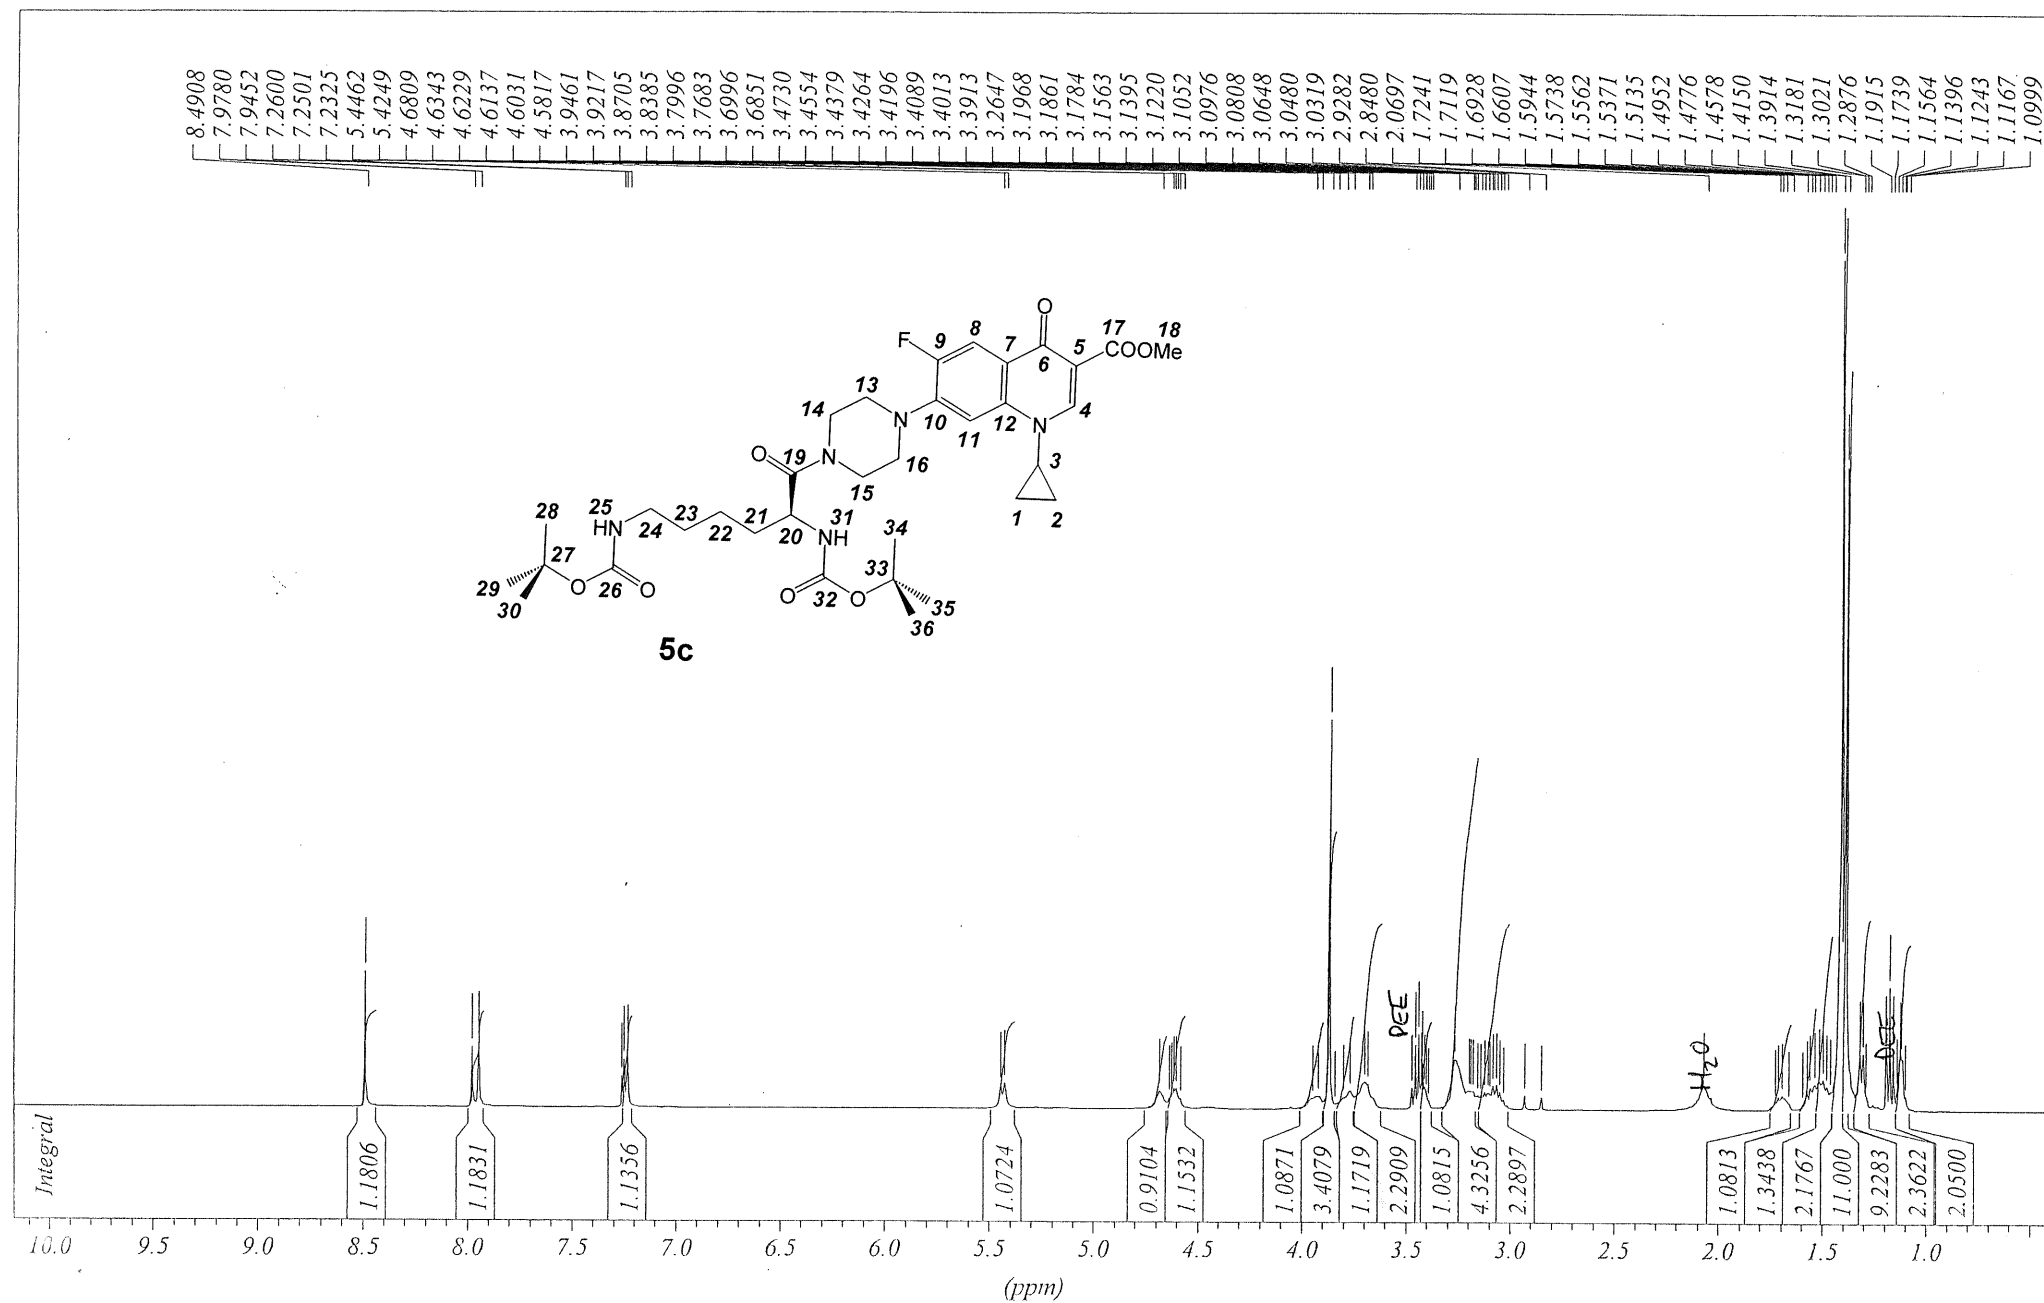

k5190sjm: DBL-Lys-Cpf-Me [SJM-20-04-10]

Acquisition Freq. = 100.535 MHz

5c

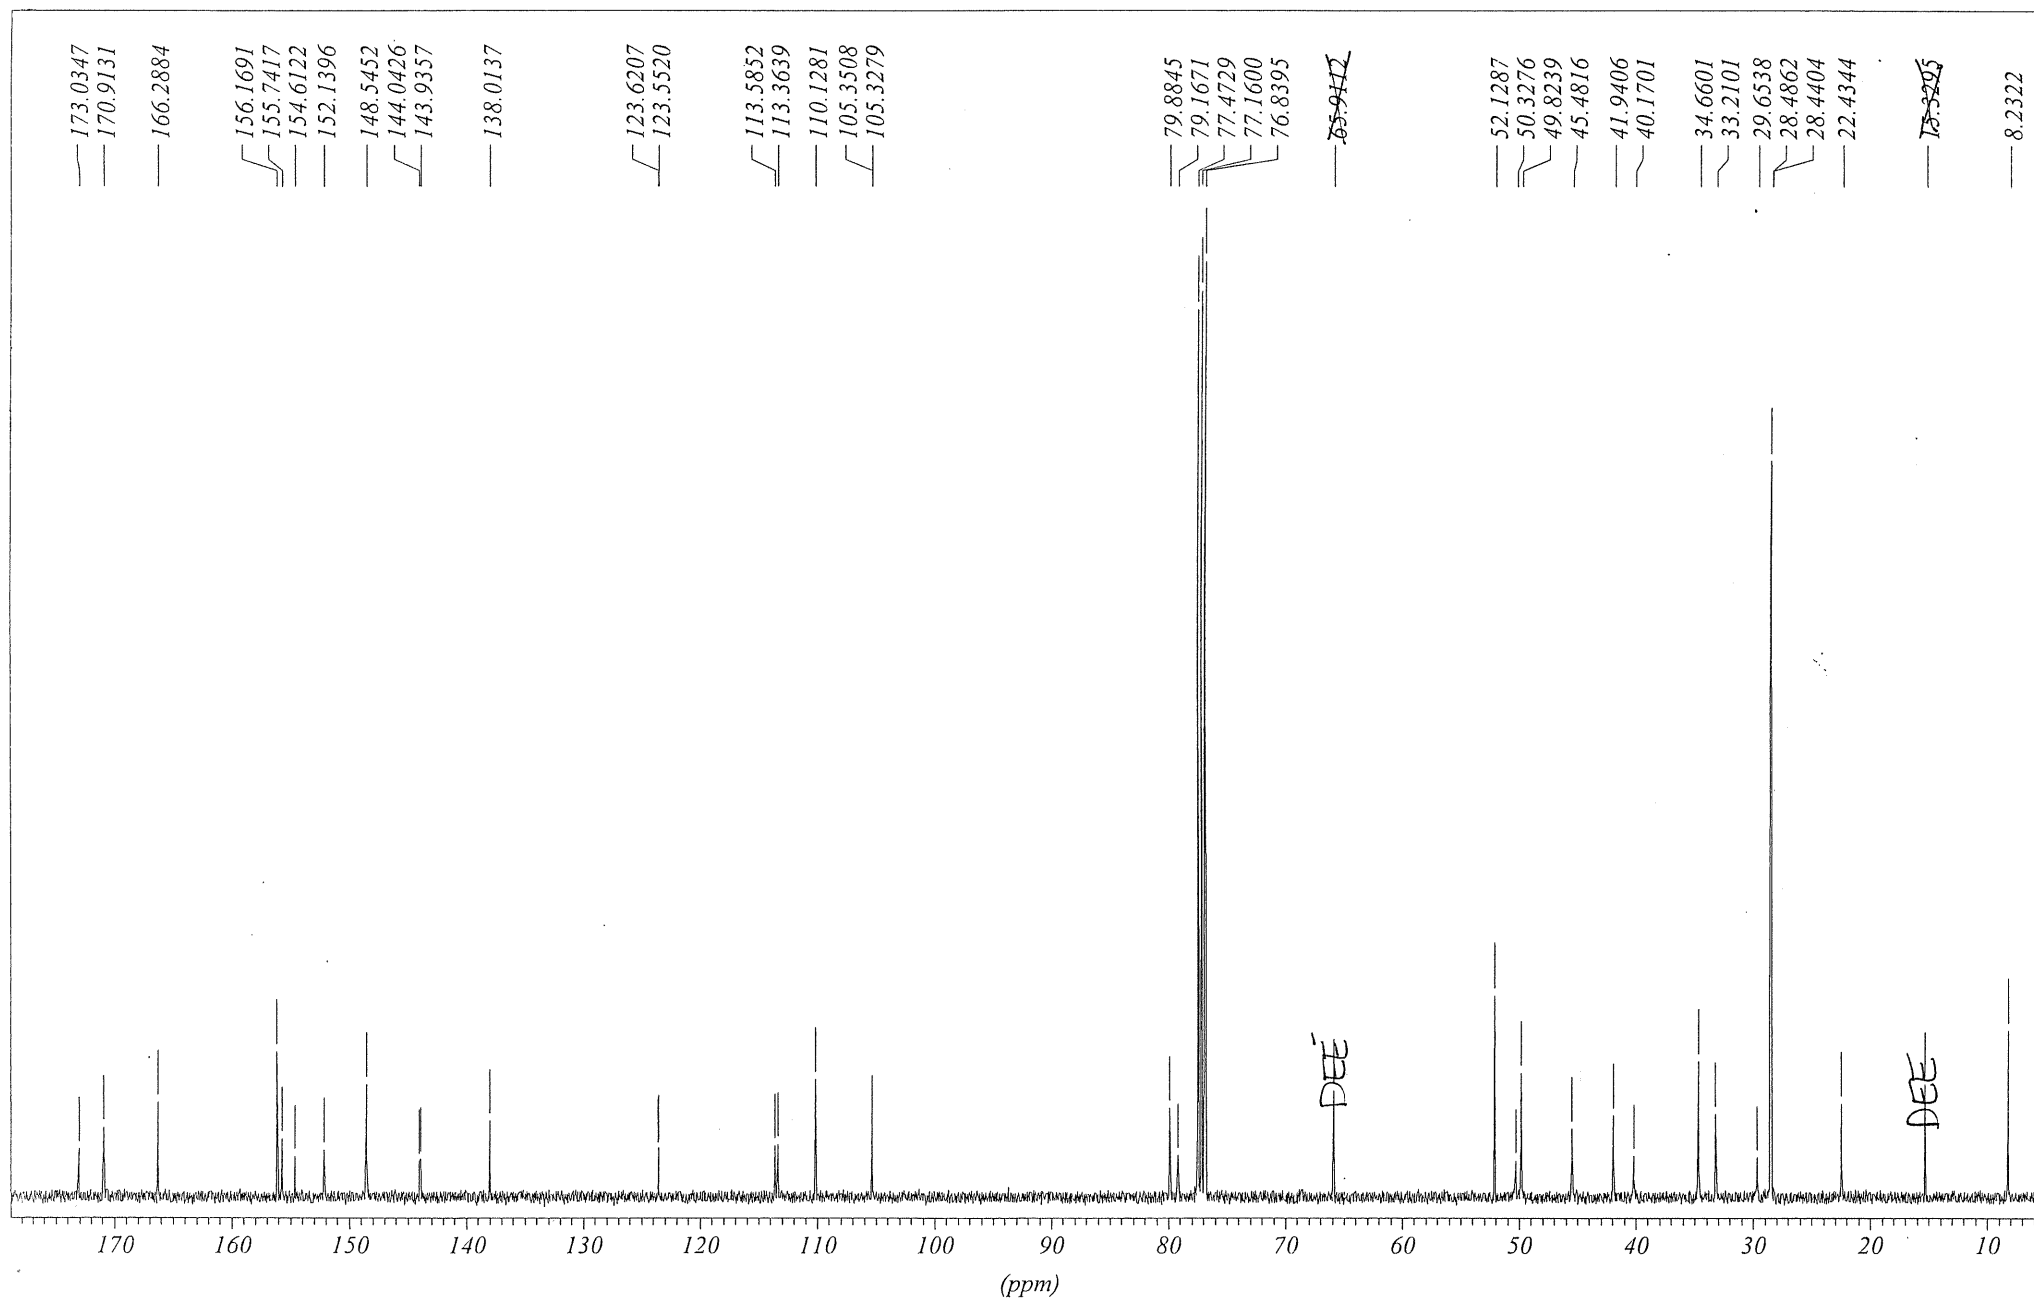

Data for methyl 7-{4-[(2S)-2,5-bis({[(*tert*-butoxy)carbonyl]amino})pentanoyl]piperazin-1-yl}-1-ethyl-6-fluoro-4-oxo-1,4-dihydroquinoline-3-carboxylate (5d).

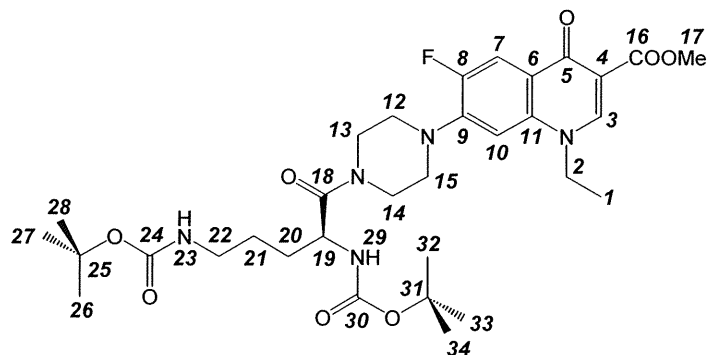

**<sup>1</sup>H NMR** (CDCl<sub>3</sub>, 400 MHz) δ<sub>H</sub> 8.43 (1H, s, H-3), 8.08 (1H, d, <sup>3</sup>J<sub>H-F</sub> = 12.9 Hz, H-7), 6.73 (1H, d, <sup>4</sup>J<sub>H-F</sub> = 6.64 Hz, H-10), 5.42 (1H, d, <sup>3</sup>J<sub>H-H</sub> = 8.56 Hz, H-29), 4.66 (2H, br s, H-19, 23), 4.20 (2H, q, <sup>3</sup>J<sub>H-H</sub> = 7.24 Hz, H-2), 3.95 (1H, br s, H-12/15), 3.90 (3H, s, H-17), 3.83-3.79 (1H, br m, H-12/15), 3.74-3.66 (2H, m, H-12/15), 3.24-3.13 (6H, m, H-13, 14, 22), 1.91 (1H, br s, H-20), 1.73-1.71 (1H, br m, H-20), 1.58-1.56 (2H, m, H-21), 1.53 (3H, t, <sup>3</sup>J<sub>H-H</sub> = 7.24 Hz, H-1), 1.42 (9H, s, H-32, 33, 34), 1.40 (9H, s, H-26, 27, 28).

**<sup>13</sup>C NMR** (CDCl<sub>3</sub>, 100 MHz) δ<sub>C</sub> 173.08 (C=O, C-5), 170.81 (C=O, C-18), 166.64 (C=O, C-16), 156.15 (C=O, C-30), 155.67 (C=O, C-24), 153.28 (*ipso*-Ar, d, <sup>1</sup>J<sub>C-F</sub> = 249 Hz, C-8), 148.50 (CH, C-3), 144.28 (*ipso*-Ar, d, <sup>2</sup>J<sub>C-F</sub> = 10.7 Hz, C-9), 136.15 (*ipso*-Ar, C-4), 124.60 (*ipso*-Ar, d, <sup>3</sup>J<sub>C-F</sub> = 6.90 Hz, C-6), 114.08 (CH, d, <sup>2</sup>J<sub>C-F</sub> = 23.0 Hz, C-7), 110.41 (*ipso*-Ar, C-11), 104.40 (CH, C-10), 79.95 (4°-C, C-31), 79.35 (4°-C, C-25), 52.24 (CH<sub>3</sub>, C-17), 50.43 (CH<sub>2</sub>, C-12/15), 50.02 (CH<sub>2</sub>, C-12/15), 49.63 (CH, C-19), 49.12 (CH<sub>2</sub>, C-2), 45.52 (CH<sub>2</sub>, C-13, 15), 42.02 (CH<sub>2</sub>, C-22), 30.82 (CH<sub>2</sub>, C-20), 28.51 (CH<sub>3</sub>, C-32, 33, 34), 28.46 (CH<sub>3</sub>, C-26, 27, 28), 25.98 (CH<sub>2</sub>, C-21), 14.57 (CH<sub>3</sub>, C-1).

d0250sjm: DBL-Orn-Nrf-Me [SJM-13-07-10]

Acquisition Freq. = 399.783 MHz

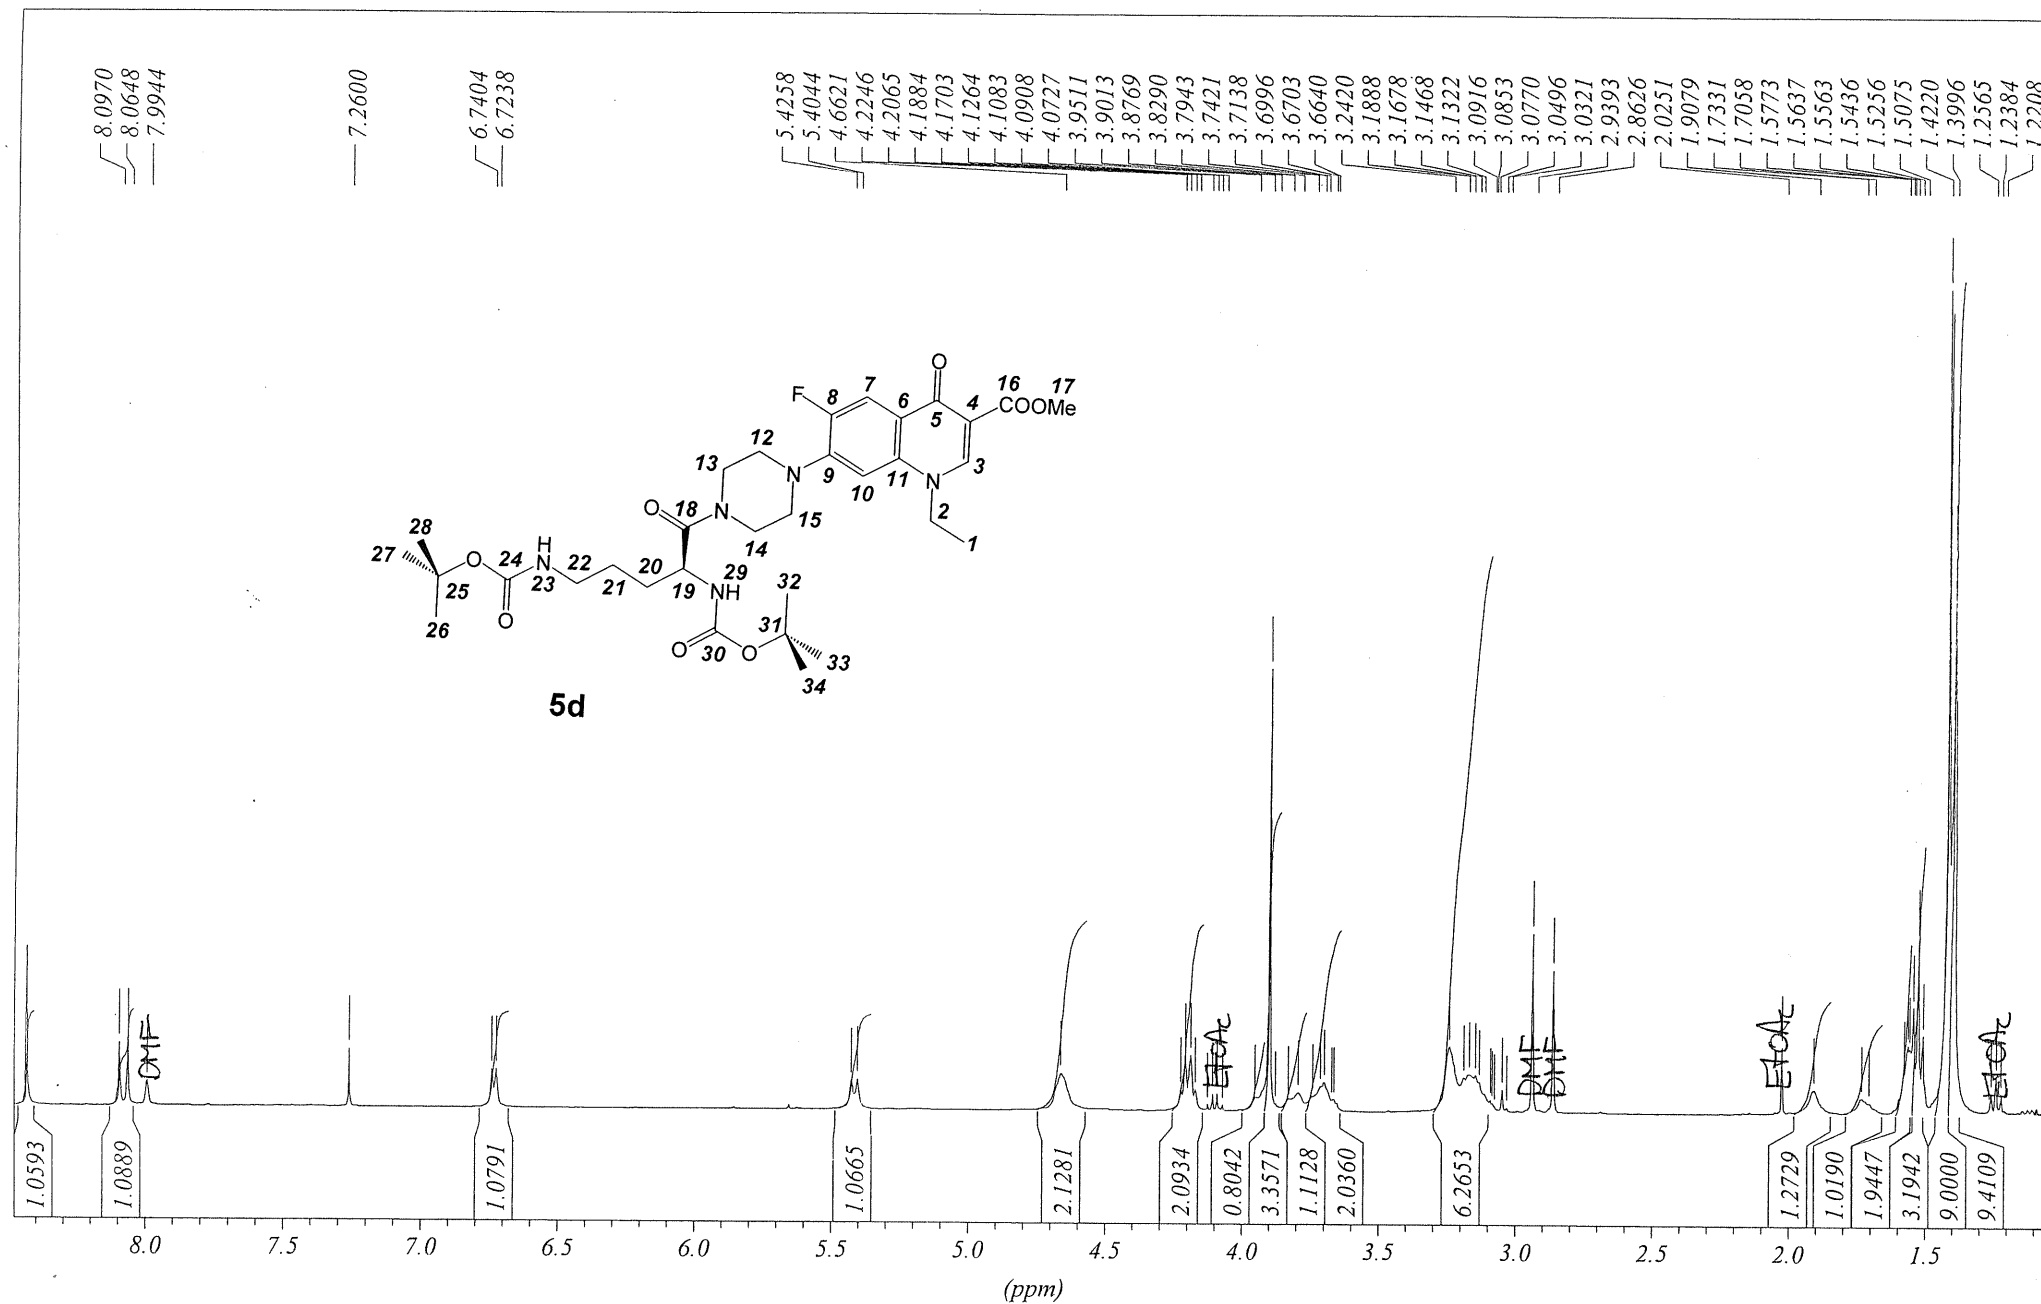

Acquisition Freq. = 100.535 MHz

5d

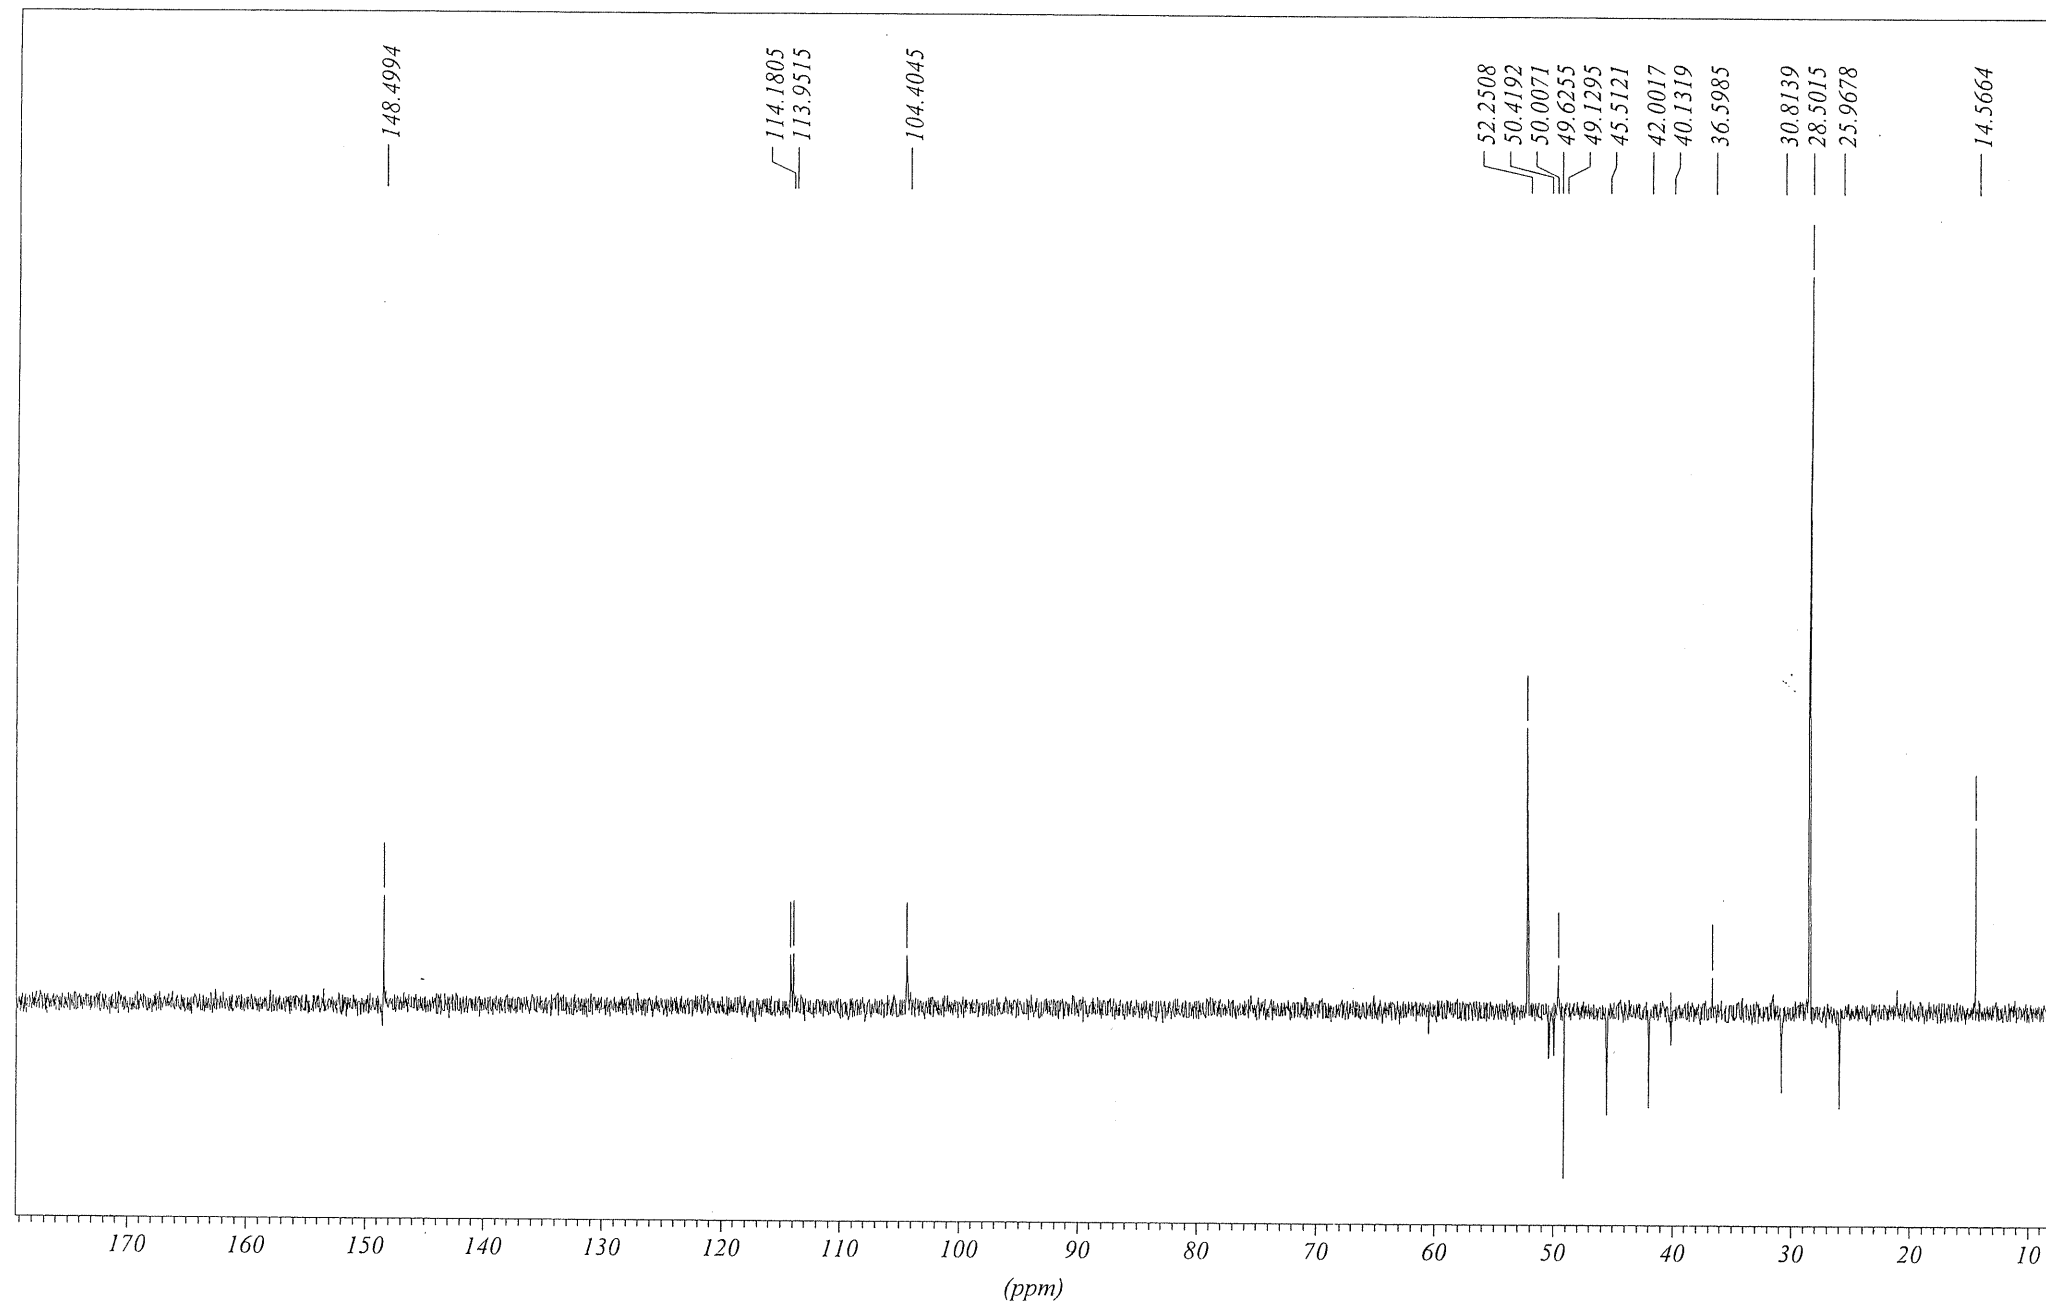

Data for 2-({[(2*R*)-1-[4-(3-carboxy-1-cyclopropyl-6-fluoro-4-oxo-1,4-dihydroquinolin-7-yl)piperazin-1-yl]-5-(3,4-dicarboxy-3-hydroxybutanamido)-1-oxopentan-2-yl]carbamoyl}methyl)-2-hydroxybutanedioic acid (9a).

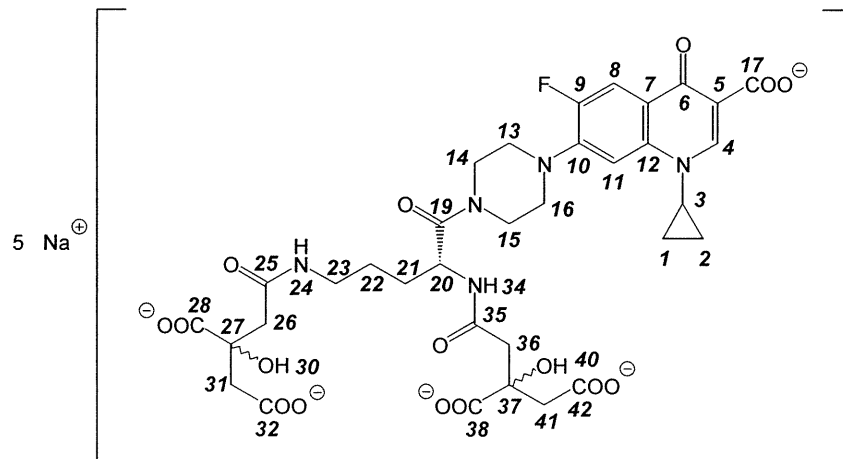

**<sup>1</sup>H NMR** (D<sub>2</sub>O, 400 MHz)  $\delta_{\text{H}}$  8.47 (1H, s, H-4), 7.64 (1H, d, <sup>3</sup>J<sub>H-F</sub> = 12.2 Hz, H-8), 7.46 (1H, d, <sup>4</sup>J<sub>H-F</sub> = 6.12 Hz, H-11), 4.87-4.84 (1H, br s, H-20), 3.89-3.76 (4H, br m, H-13, 16), 3.63-3.47 (2H, br m, H-3, 14/15), 3.39-3.26 (3H, br m, H-14/15), 3.22-3.15 (2H, m, H-23), 2.79-2.44 (8H, m, H-26, 31, 36, 41), 1.75-1.66 (2H, br m, H-21), 1.60-1.52 (2H, br m, H-22), 1.34-1.33 (2H, m, H-1/2), 1.08 (2H, br s, H-1/2).

**<sup>13</sup>C NMR** (D<sub>2</sub>O, 100 MHz)  $\delta_{\text{C}}$  181.44 (C=O), 181.28 (C=O), 179.80 (C=O), 173.63 (C=O), 173.39 (C=O), 172.84 (C=O), 154.12 (*ipso*-Ar, <sup>1</sup>J<sub>C-F</sub> = 248 Hz, C-9), 148.19 (CH, C-4), 145.07 (*ipso*-Ar, d, <sup>2</sup>J<sub>C-F</sub> = 10.7 Hz, C-10), 139.65 (*ipso*-Ar, C-5), 114.26 (*ipso*-Ar, C-7), 112.09 (CH, d, <sup>2</sup>J<sub>C-F</sub> = 23.0 Hz, C-8), 107.51 (CH, C-11), 76.05 (4°-C, C-37), 75.89 (4°-C, C-27), 50.71 (CH, C-20), 50.34 (CH<sub>2</sub>, C-23), 46.34 (CH<sub>2</sub>, C-14/15), 45.52 (CH<sub>2</sub>, C-13/16), 45.03 (CH<sub>2</sub>, C-13/16), 43.01 (CH<sub>2</sub>, C-31, 41), 39.96 (CH<sub>2</sub>, C-26/36), 39.73 (CH<sub>2</sub>, C-26/36), 39.15 (CH<sub>2</sub>, C-23), 36.14 (CH, C-3), 28.14 (CH<sub>2</sub>, C-21), 25.53 (CH<sub>2</sub>, C-22), 8.38 (CH<sub>2</sub>, C-1, 2).

51sjm: 2(1,3-C)-D-Orn-Cpf [SJM-22-02-11]

Acquisition Freq. = 399.785 MHz

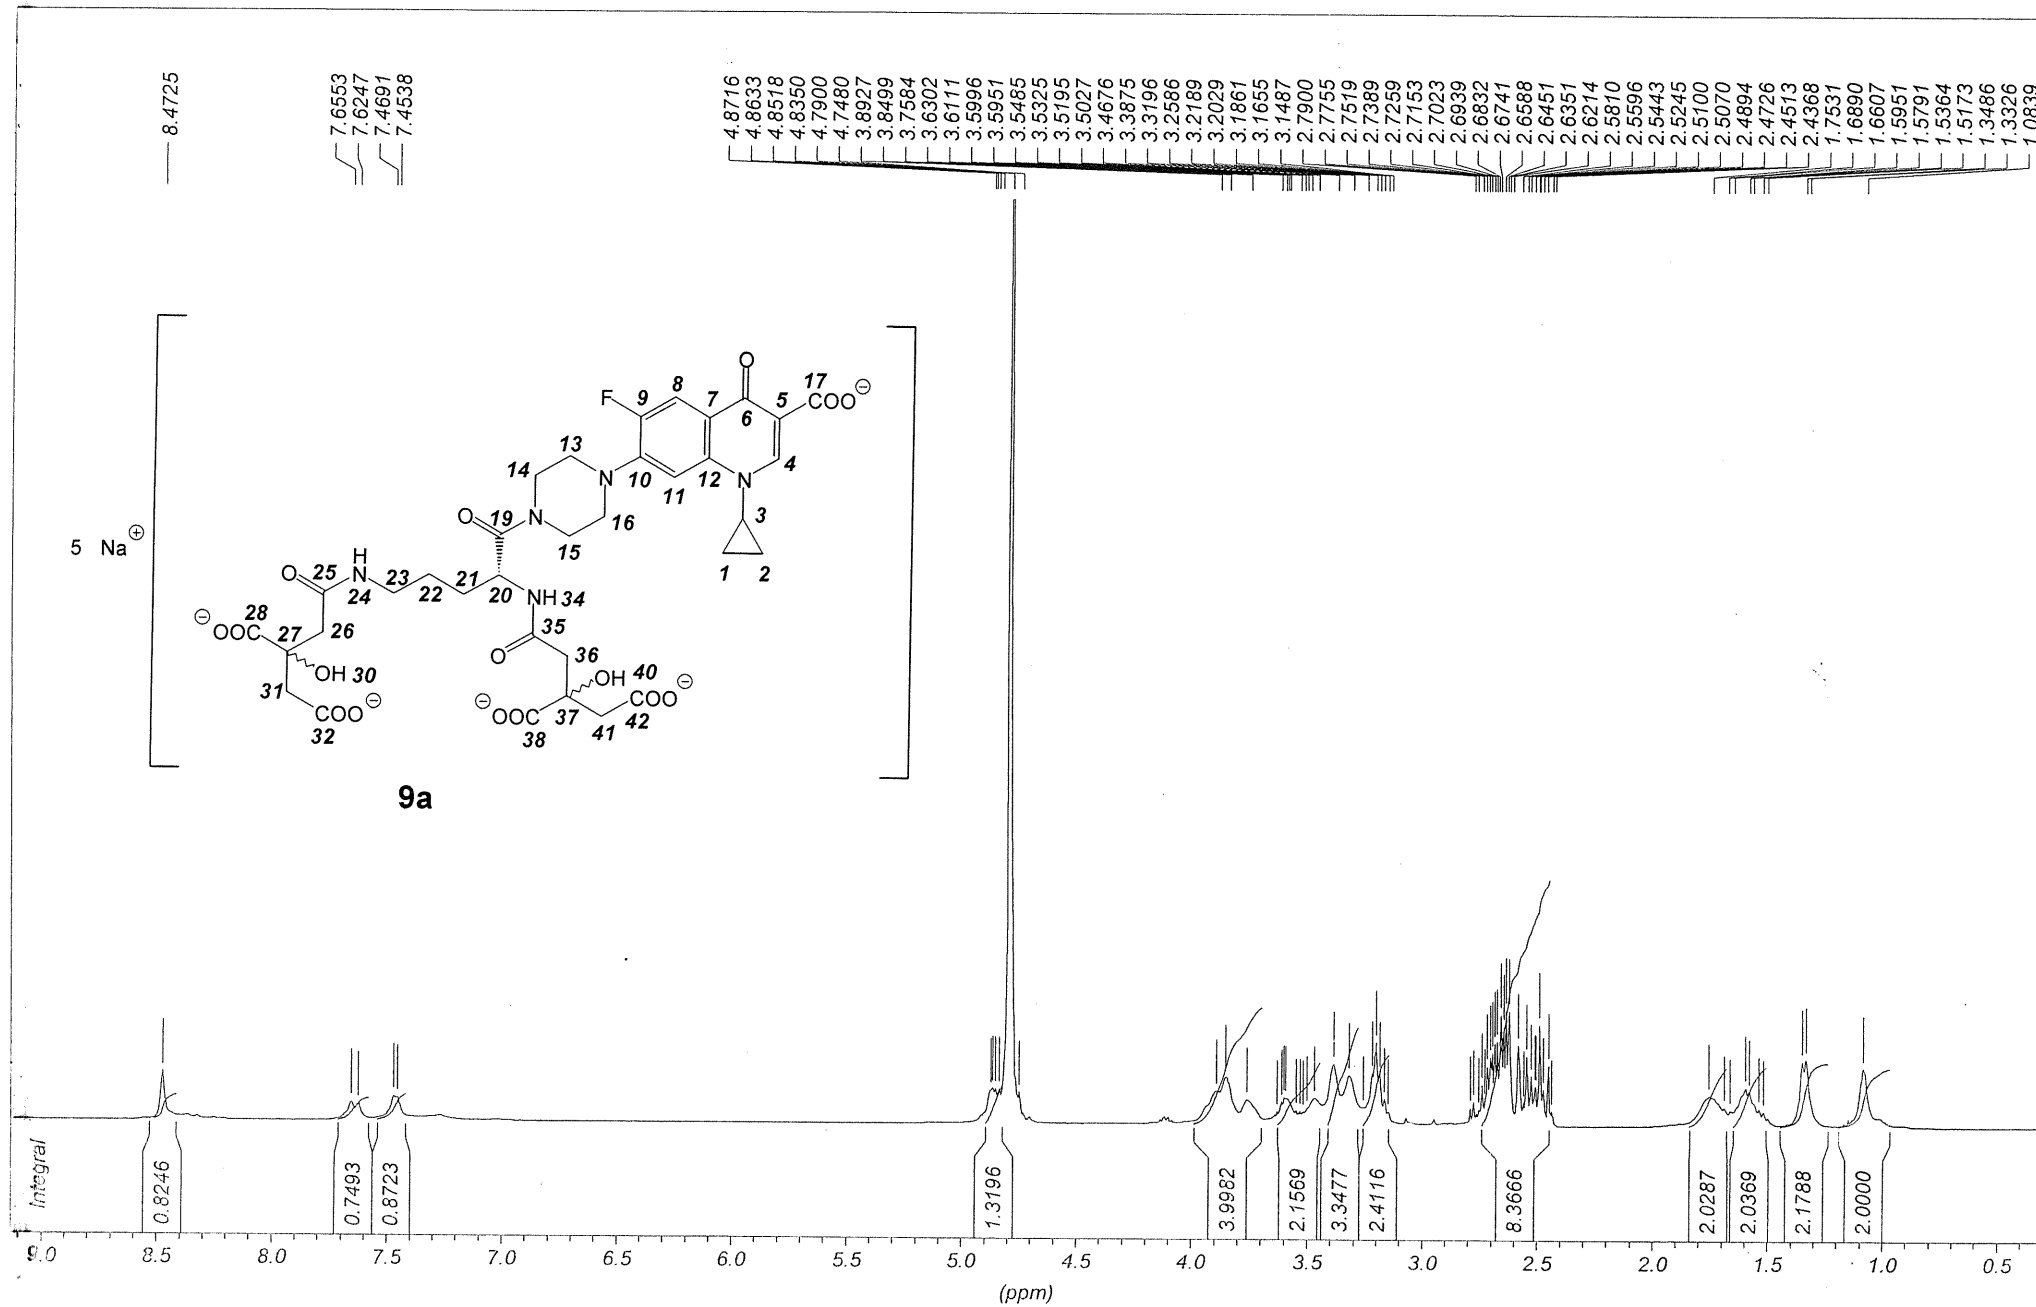

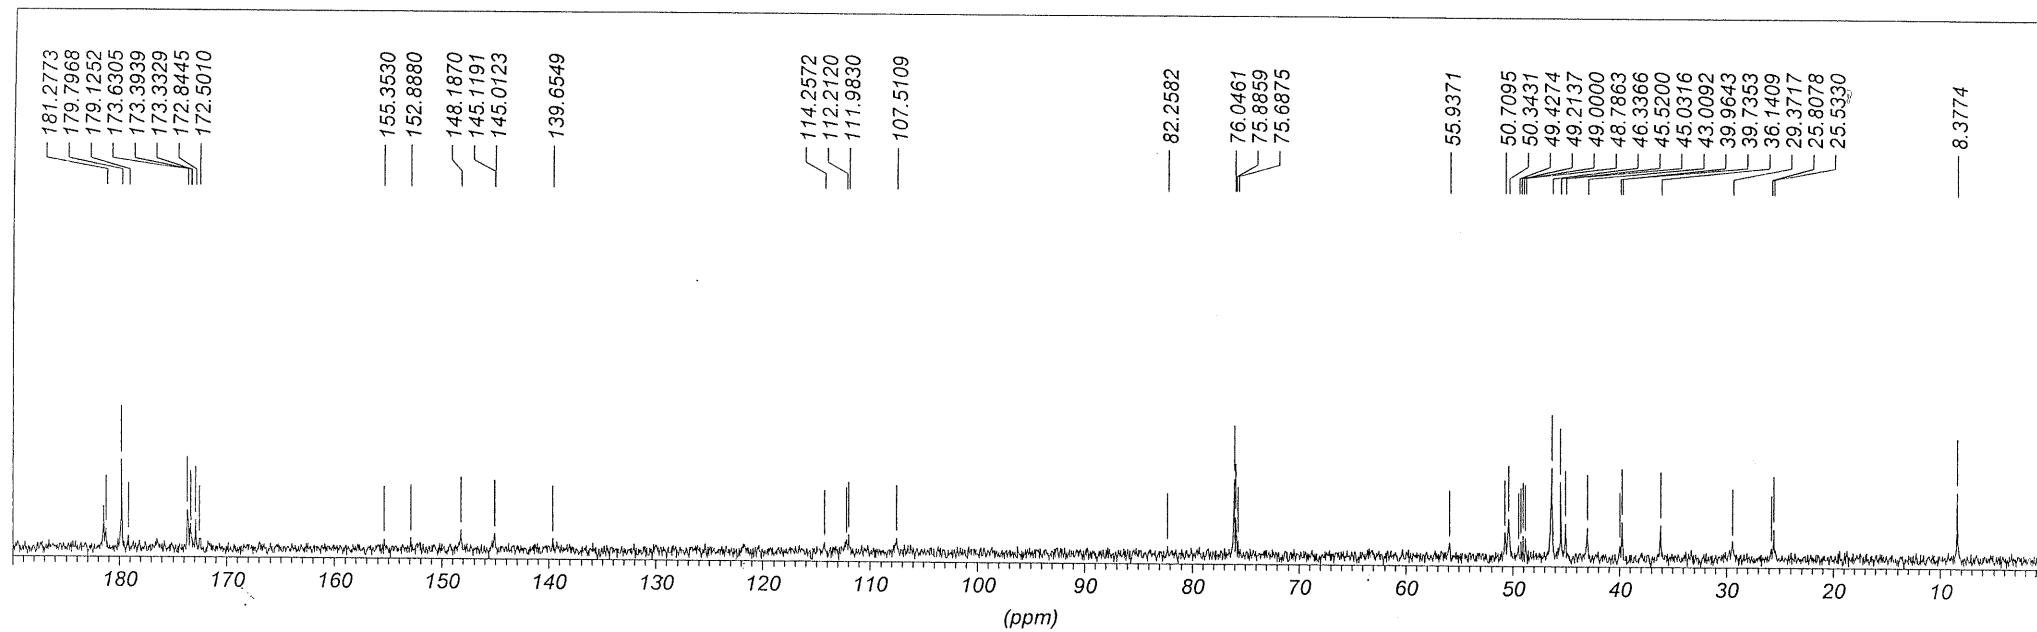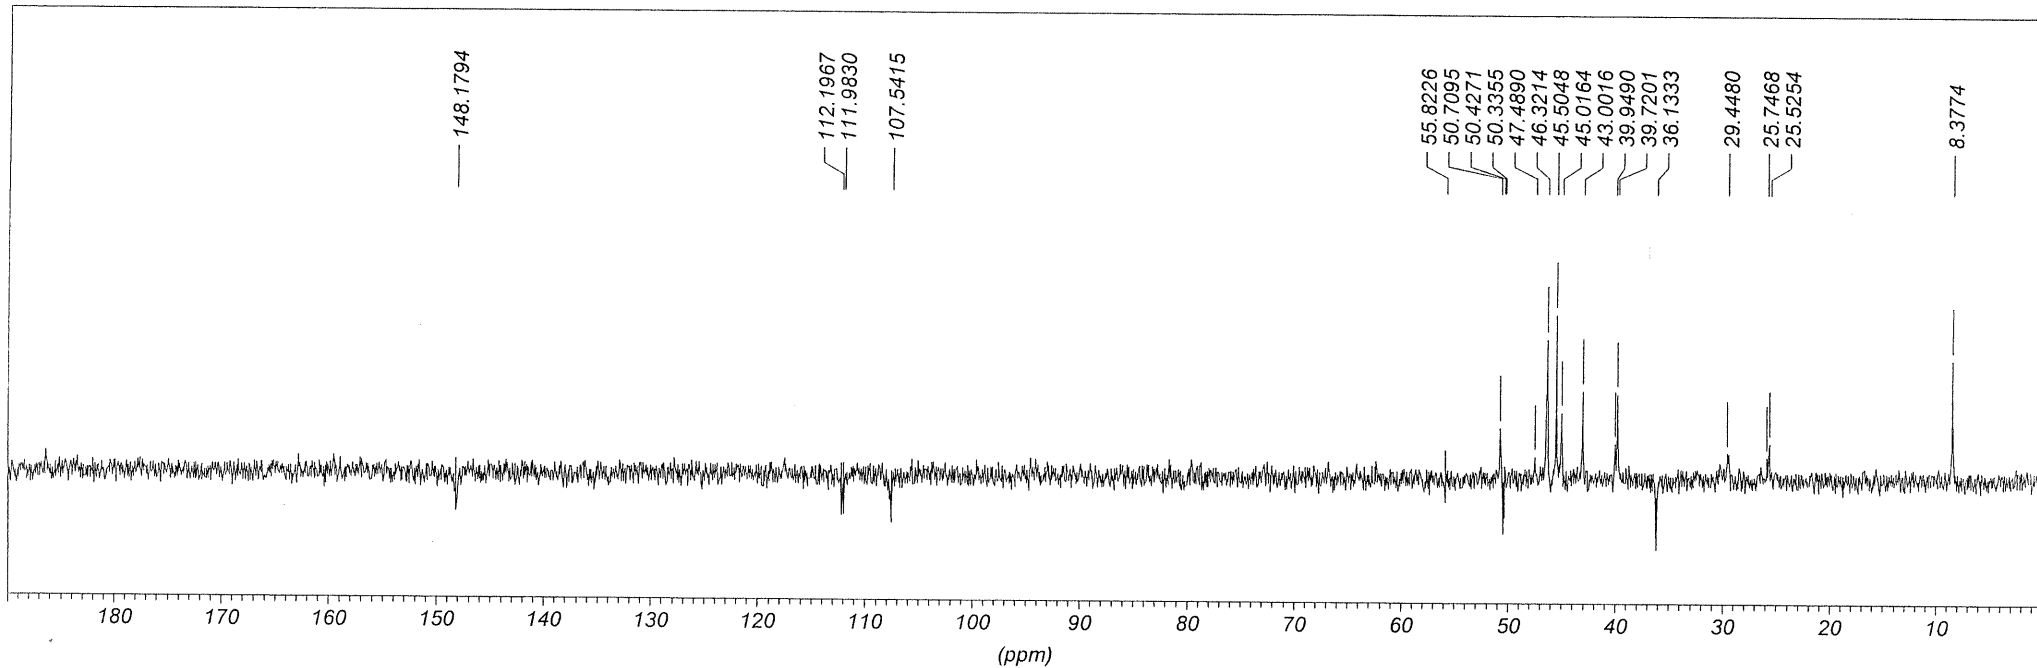



Data for 2-({[(2S)-1-[4-(3-carboxy-1-cyclopropyl-6-fluoro-4-oxo-1,4-dihydroquinolin-7-yl)piperazin-1-yl]-5-(3,4-dicarboxy-3-hydroxybutanamido)-1-oxopentan-2-yl]carbamoyl}methyl)-2-hydroxybutanedioic acid (9b).

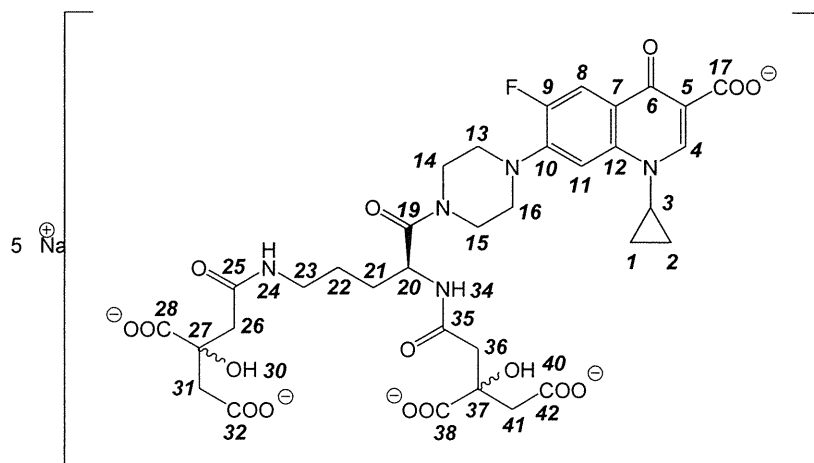

$^1\text{H NMR}$  ( $\text{D}_2\text{O}$ , 400 MHz)  $\delta_{\text{H}}$  8.46 (1H, s, H-4), 7.64 (1H, d,  $^3J_{\text{H-F}} = 12.2$  Hz, H-8), 7.46 (1H, d,  $^4J_{\text{H-F}} = 6.12$  Hz, H-11), 4.85-4.88 (1H, br s, H-20), 3.86-3.75 (4H, br m, H-13, 16), 3.60-3.49 (2H, br m, H-3, 14/15), 3.40-3.27 (3H, br m, H-14/15), 3.21-3.16 (2H, m, H-23), 2.81-2.45 (8H, m, H-26, 31, 36, 41), 1.76-1.66 (2H, br m, H-21), 1.58-1.52 (2H, br m, H-22), 1.34-1.34 (2H, m, H-1/2), 1.06 (2H, br s, H-1/2).

$^{13}\text{C NMR}$  ( $\text{D}_2\text{O}$ , 100 MHz)  $\delta_{\text{C}}$  181.56 (C=O), 181.29 (C=O), 179.78 (C=O), 173.61 (C=O), 173.39 (C=O), 172.85 (C=O), 154.16 (*ipso*-Ar,  $^1J_{\text{C-F}} = 248$  Hz, C-9), 148.23 (CH, C-4), 145.05 (*ipso*-Ar, d,  $^2J_{\text{C-F}} = 10.7$  Hz, C-10), 139.67 (*ipso*-Ar, C-5), 114.25 (*ipso*-Ar, C-7), 112.11 (CH, d,  $^2J_{\text{C-F}} = 23.0$  Hz, C-8), 107.52 (CH, C-11), 76.06 ( $4^\circ$ -C, C-37), 75.89 ( $4^\circ$ -C, C-27), 50.70 (CH, C-20), 50.36 ( $\text{CH}_2$ , C-23), 46.35 ( $\text{CH}_2$ , C-14/15), 45.54 ( $\text{CH}_2$ , C-13/16), 45.05 ( $\text{CH}_2$ , C-13/16), 43.02 ( $\text{CH}_2$ , C-31, 41), 39.97 ( $\text{CH}_2$ , C-26/36), 39.73 ( $\text{CH}_2$ , C-26/36), 39.16 ( $\text{CH}_2$ , C-23), 36.16 (CH, C-3), 28.16 ( $\text{CH}_2$ , C-21), 25.54 ( $\text{CH}_2$ , C-22), 8.38 ( $\text{CH}_2$ , C-1, 2).

m7841sjm: 2(1,3-C)-L-Orn-Cpf [SJM-24-02-11]

Acquisition Freq. = 399.785 MHz

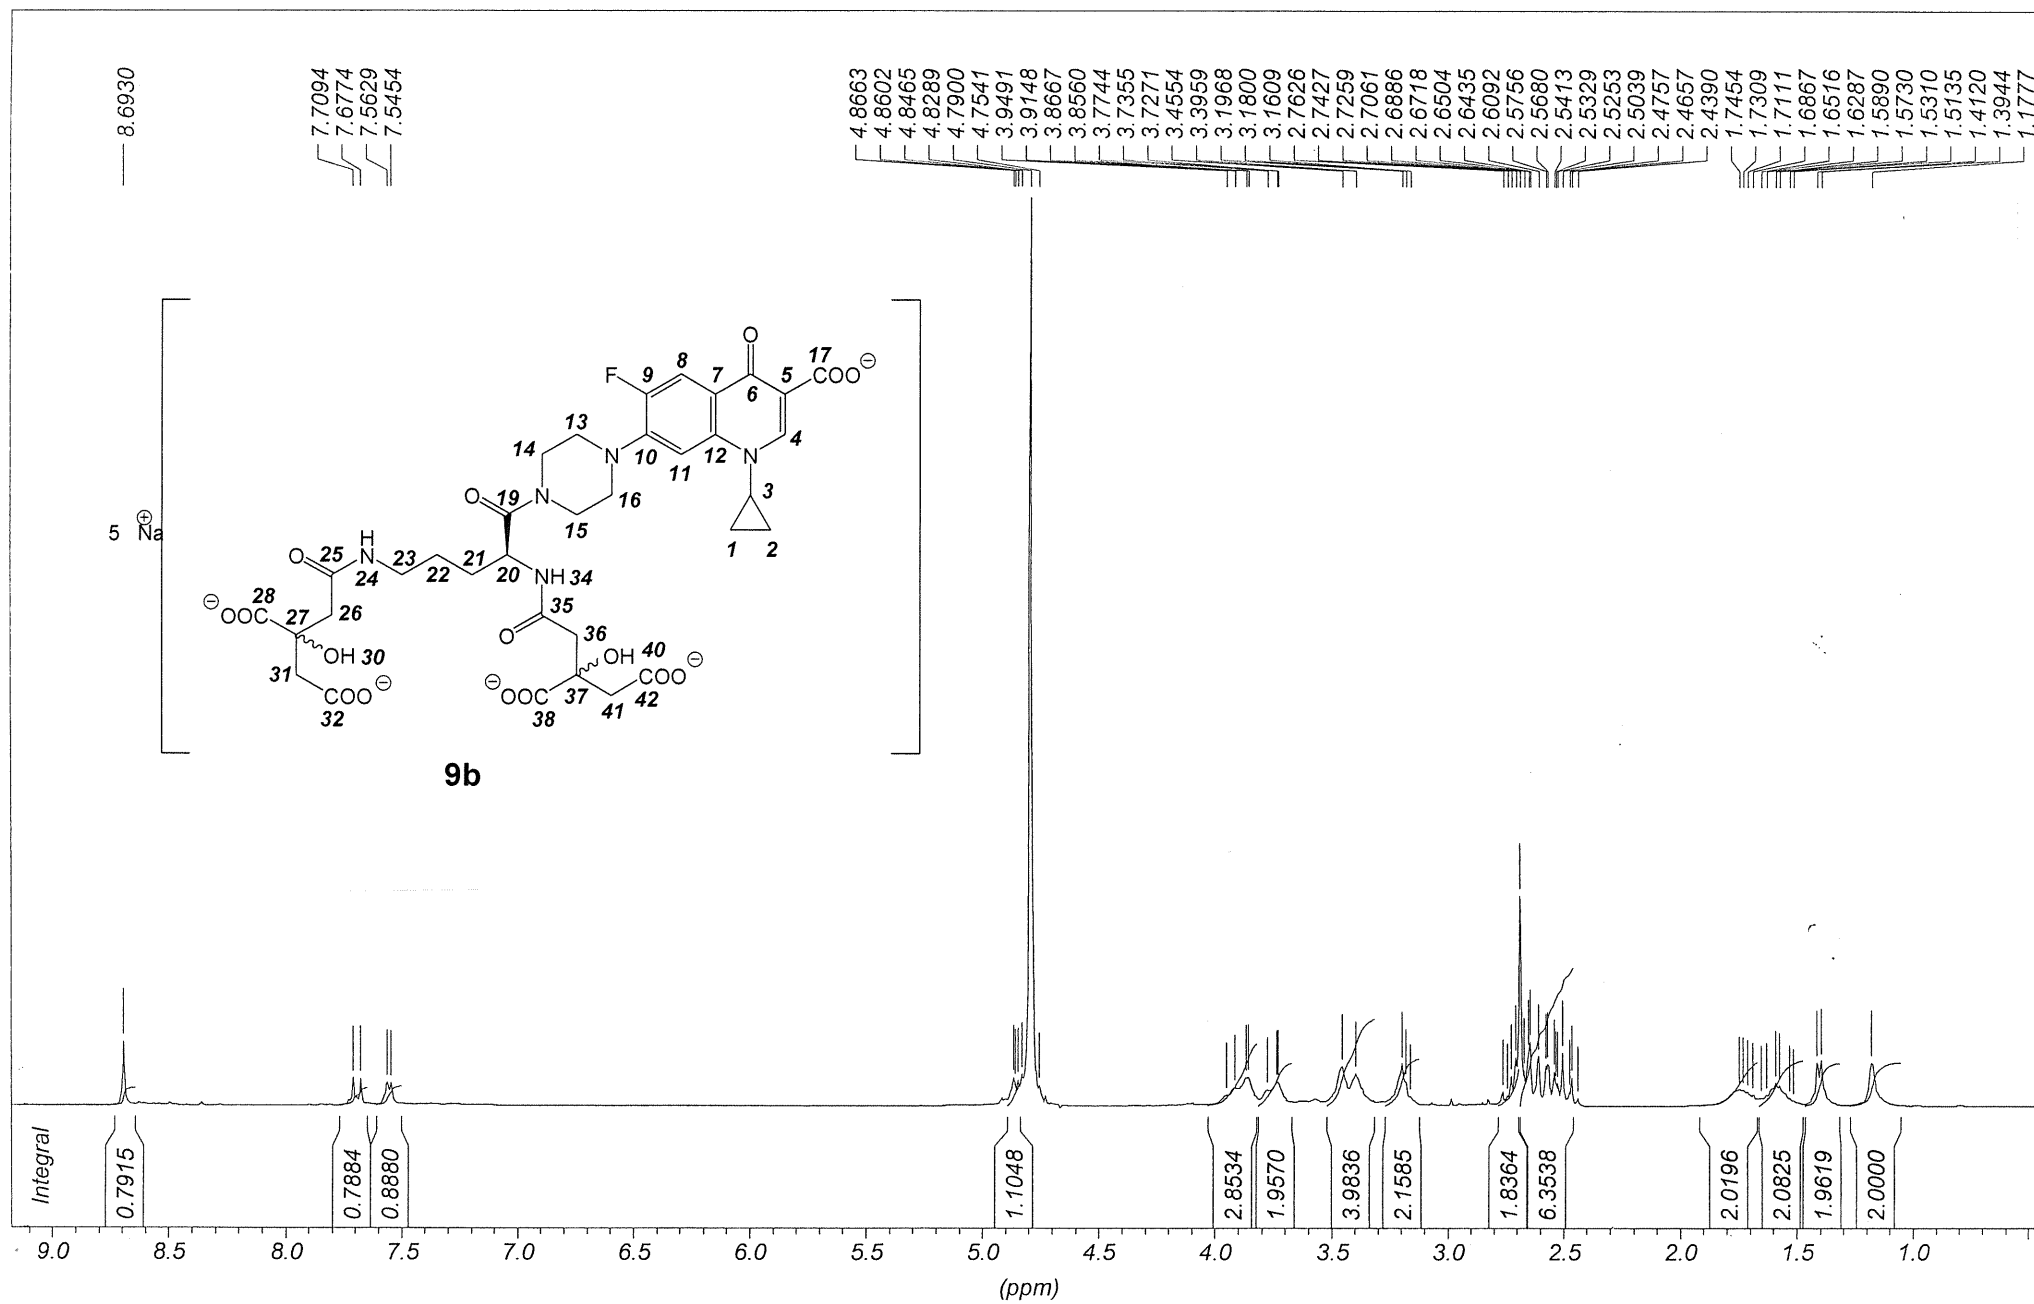

m8606sjm: 2(1,3-C)-L-Orn-Cpf [SJM-24-02-11]

Acquisition Freq. = 100.535 MHz

9b

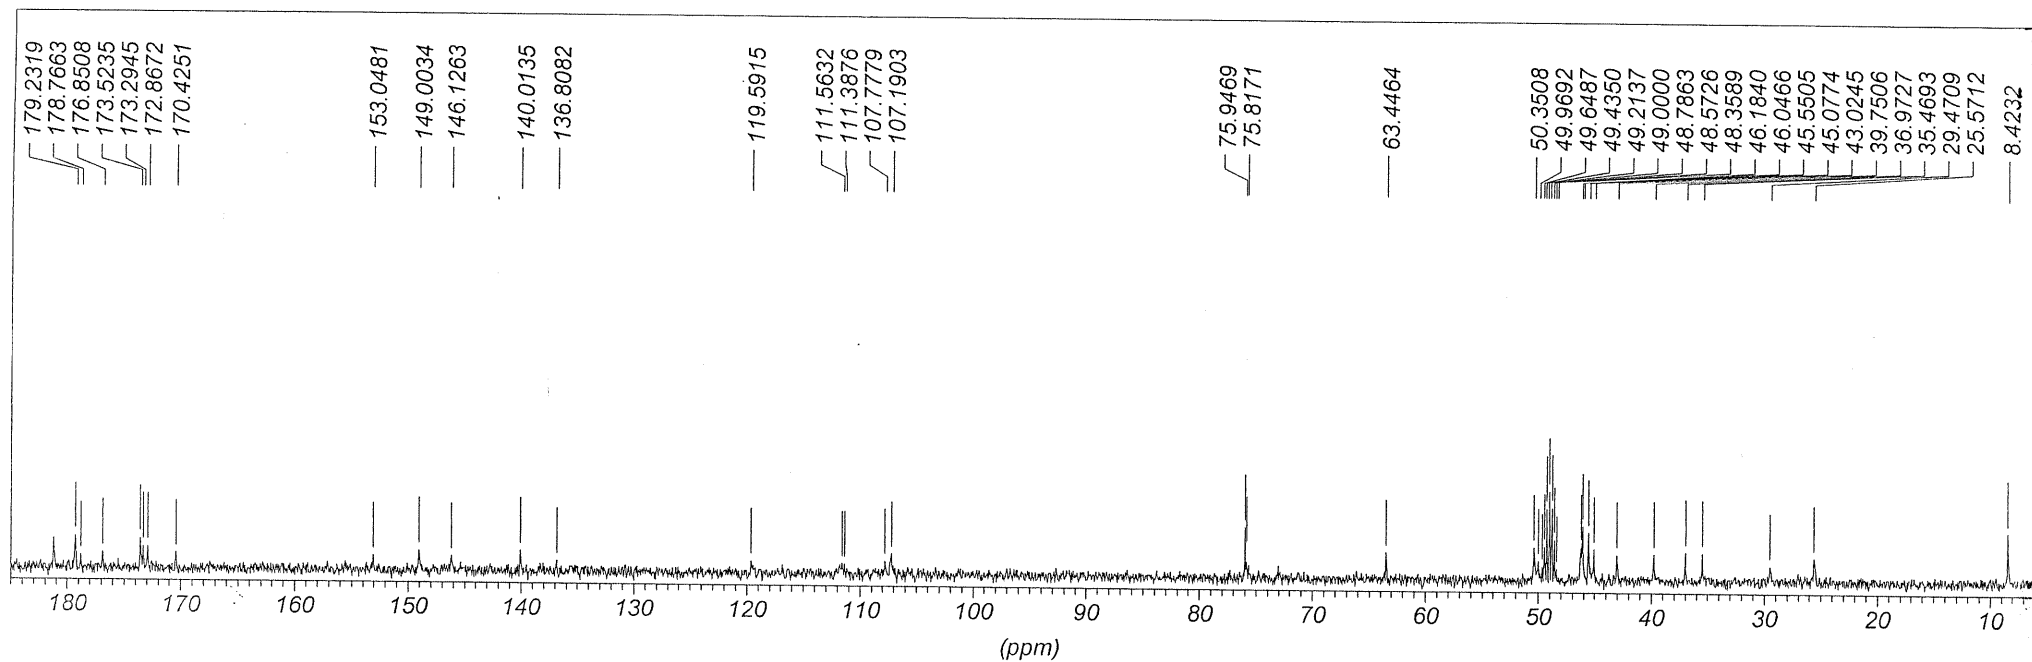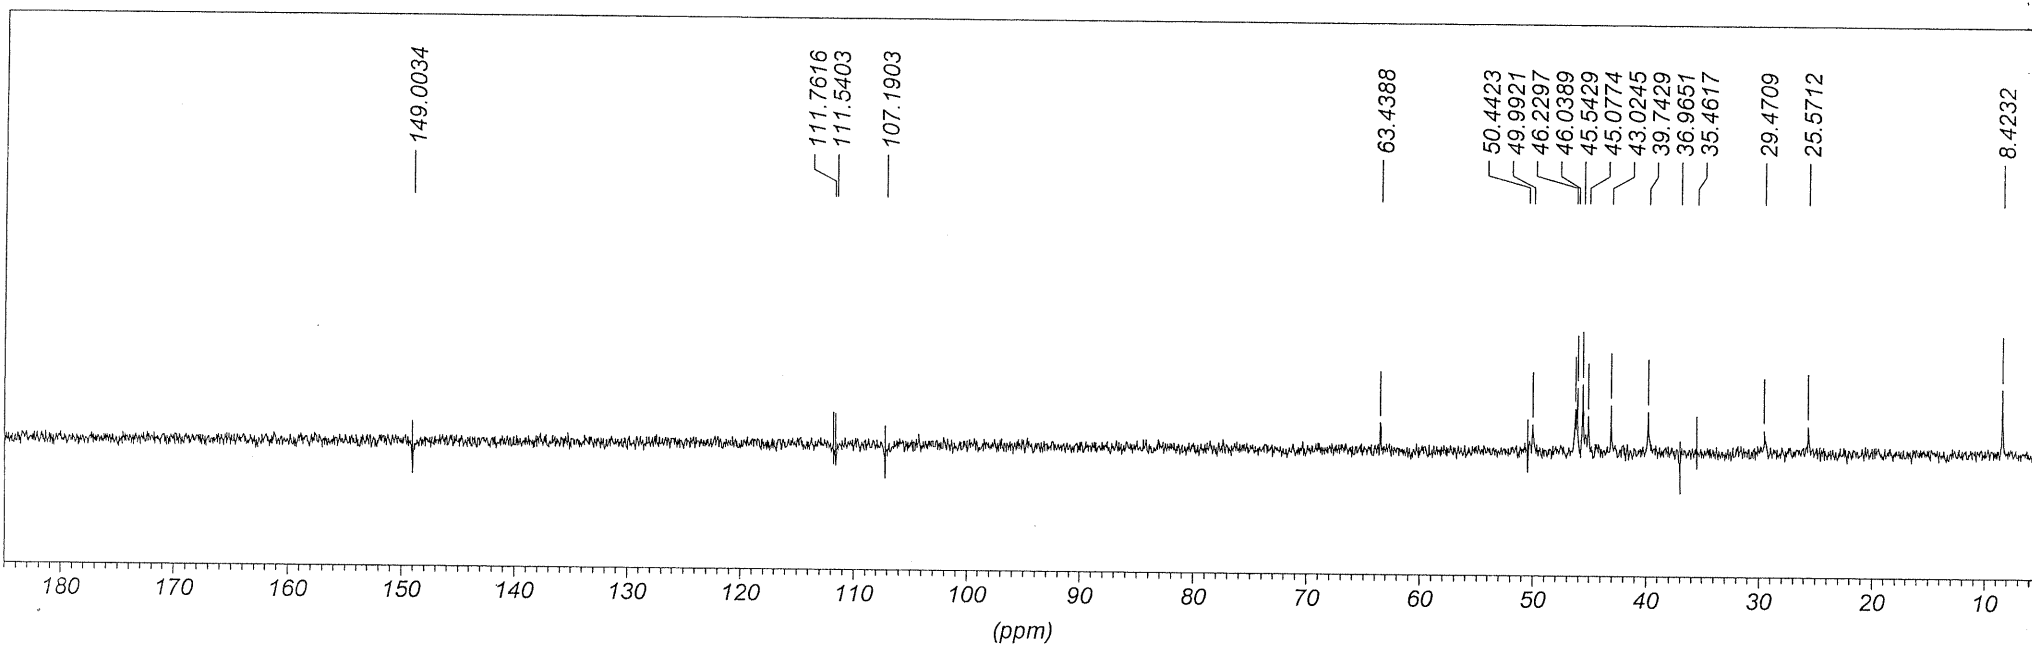

Data for 2-({[(2S)-1-[4-(3-carboxy-1-cyclopropyl-6-fluoro-4-oxo-1,4-dihydroquinolin-7-yl)piperazin-1-yl]-6-(3,4-dicarboxy-3-hydroxybutanamido)-1-oxohexan-2-yl]carbamoyl}methyl)-2-hydroxybutanedioic acid pentasodium salt (9c).

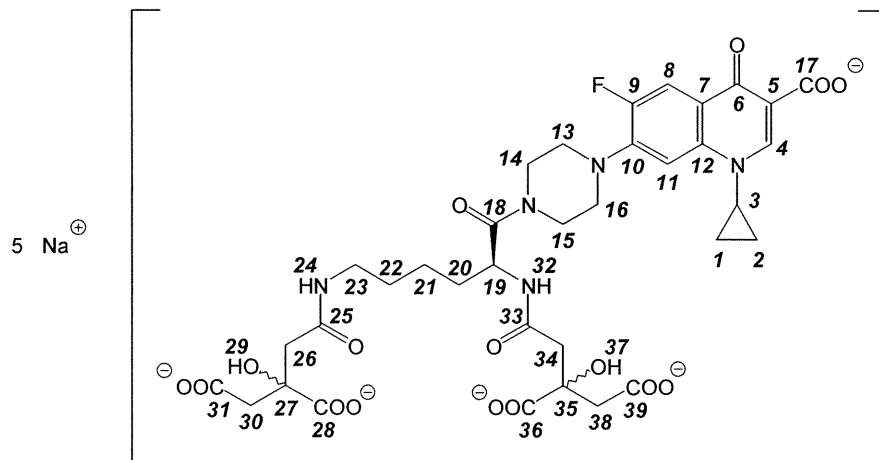

**<sup>1</sup>H NMR** (D<sub>2</sub>O, 400 MHz) δ<sub>H</sub> 8.43 (1H, s, H-**4**), 8.35-8.34 (1H, br m, H-**32**), 7.59 (1H, d, <sup>3</sup>J<sub>H-F</sub> = 12.9 Hz, H-**8**), 7.41 (1H, d, <sup>4</sup>J<sub>H-F</sub> = 6.84 Hz, H-**11**), 7.29-7.24 (1H, br m, H-**24**), 4.79 (1H, br s, H-**19**), 3.89-3.76 (4H, br m, H-**13**, **16**), 3.55 (1H, br s, H-**3**), 3.45-3.26 (4H, br m, H-**14/15**, **23**), 3.16-3.12 (2H, m, H-**14/15**), 2.76-2.44 (8H, m, H-**26**, **30**, **34**, **38**), 1.74-1.73 (2H, br m, H-**20**), 1.53-1.47 (2H, br m, H-**22**), 1.45-1.37 (2H, br m, H-**21**), 1.33-1.31 (2H, m, H-**1/2**), 1.06-1.00 (2H, m, H-**1/2**).

**<sup>13</sup>C NMR** (D<sub>2</sub>O, 100 MHz) δ<sub>C</sub> 180.60 (C=O), 180.44 (C=O), 179.38 (C=O), 172.64 (C=O), 172.52 (C=O), 172.25 (C=O), 153.20 (*ipso*-Ar, <sup>1</sup>J<sub>C-F</sub> = 249 Hz, C-**9**), 147.28 (CH, C-**4**), 144.14 (*ipso*-Ar, d, <sup>2</sup>J<sub>C-F</sub> = 10.7 Hz, C-**10**), 138.70 (*ipso*-Ar, C-**5**), 120.93 (*ipso*-Ar, C-**7**), 111.19 (CH, d, <sup>2</sup>J<sub>C-F</sub> = 23.0 Hz, C-**8**), 106.57 (CH, C-**11**), 75.19 (4°-C, C-**35**), 75.02 (4°-C, C-**27**), 49.83 (CH, C-**19**), 49.46 (CH<sub>2</sub>, C-**23**), 48.79 (CH<sub>2</sub>, C-**14/15**), 45.46 (CH<sub>2</sub>, C-**13/16**), 44.62 (CH<sub>2</sub>, C-**30**, **38**), 44.13 (CH<sub>2</sub>, C-**26**, **34**), 42.12 (CH<sub>2</sub>, C-**13/16**), 39.15 (CH<sub>2</sub>, C-**14/15**), 35.25 (CH, C-**3**), 30.84 (CH<sub>2</sub>, C-**23**), 28.14 (CH<sub>2</sub>, C-**22**), 22.40 (CH<sub>2</sub>, C-**21**), 7.50 (CH<sub>2</sub>, C-**1**, **2**).

d5104sjm: 2(1,3-C)-L-Lys-Cpf [SJM-07-02-11]

Acquisition Freq. = 399.785 MHz

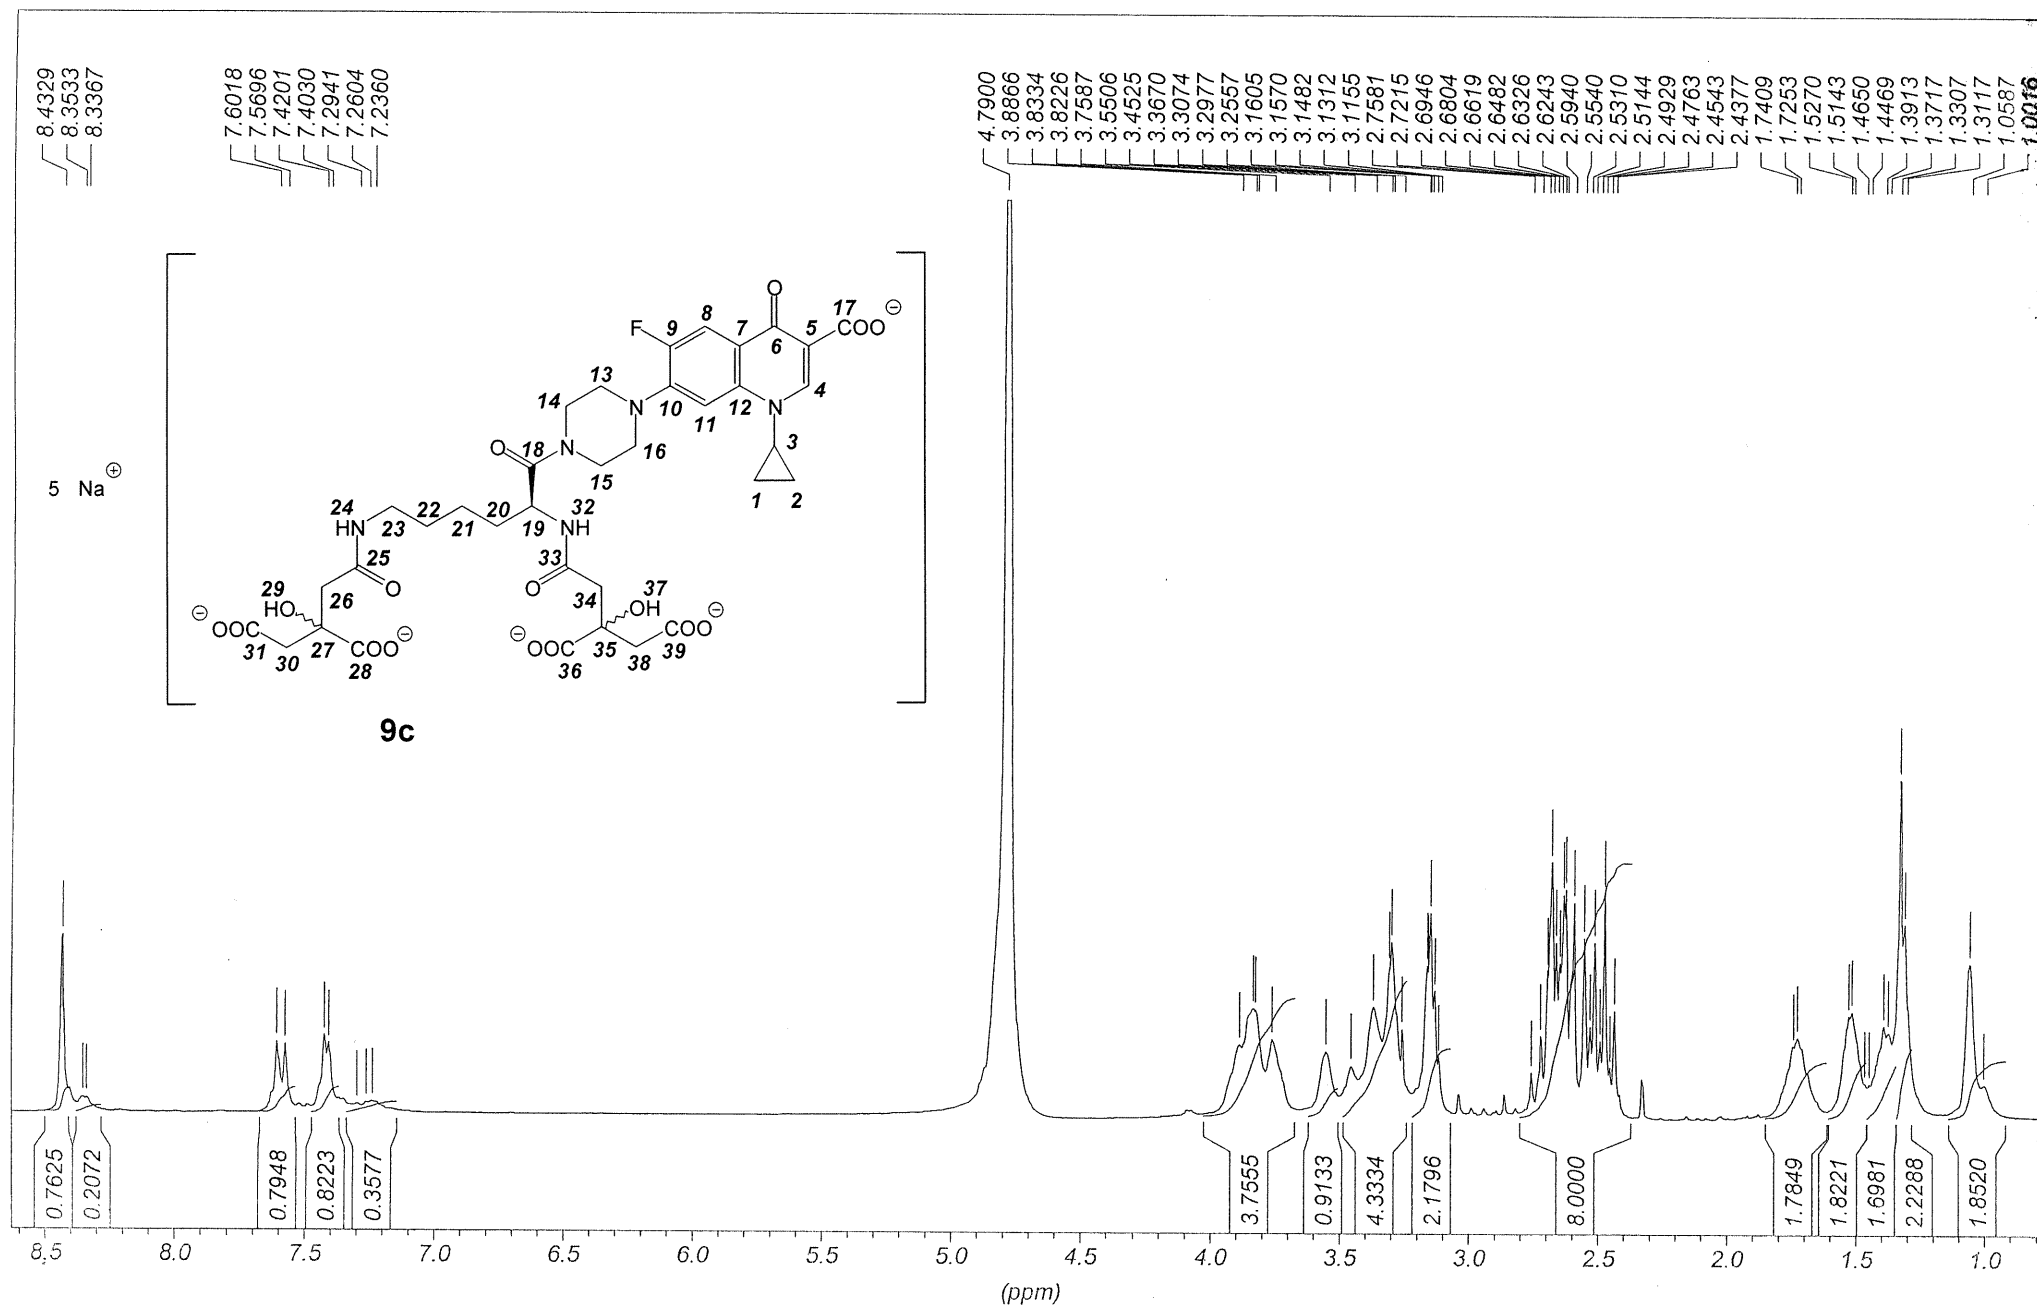

m4018sjm: 2(1,3-C)-L-Lys-Cpf [SJM-07-02-11]

Acquisition Freq. = 100.535 MHz

9c

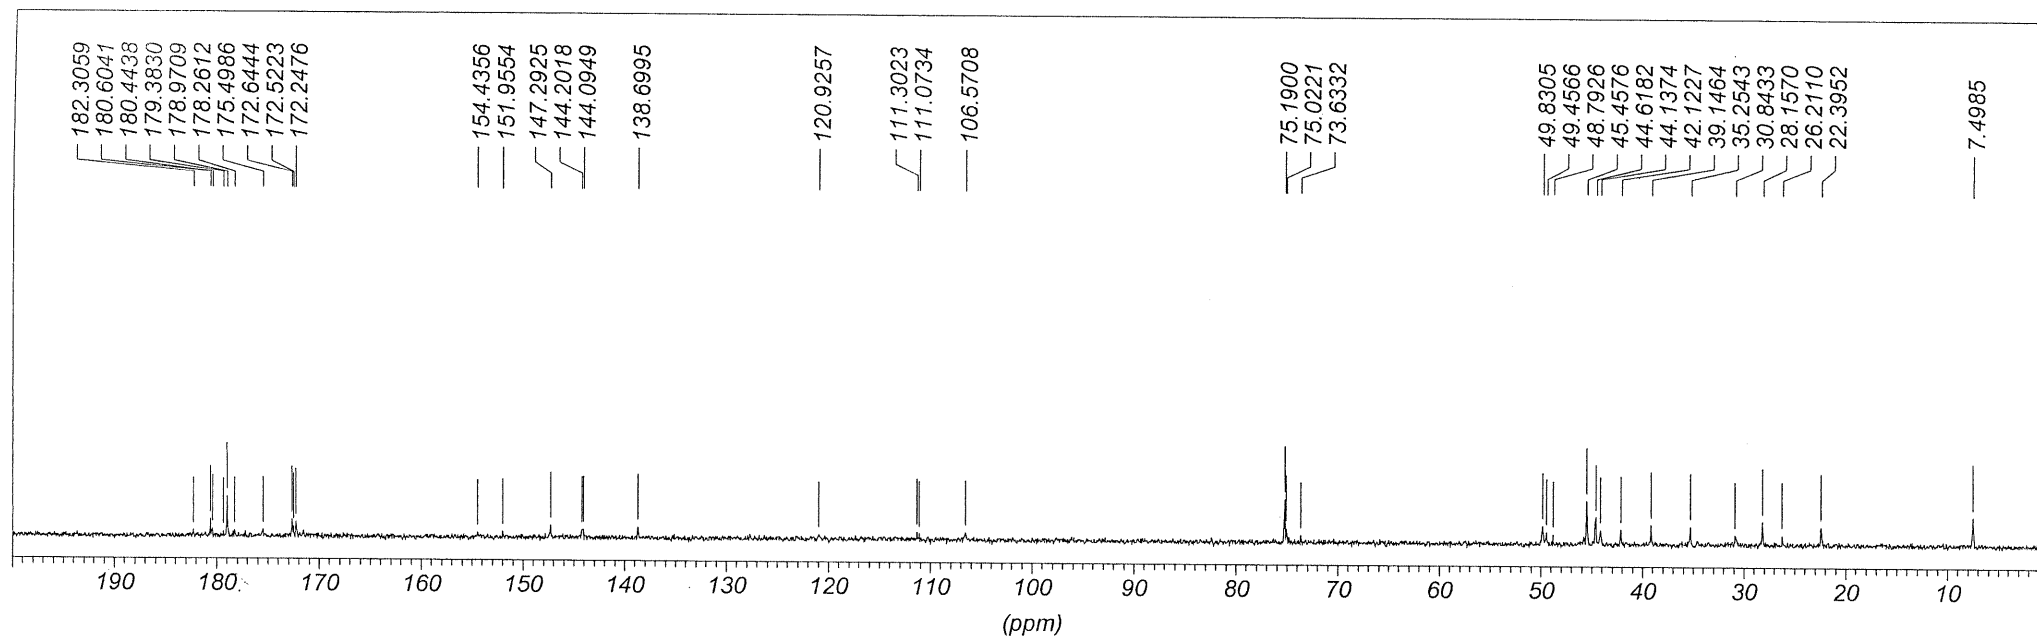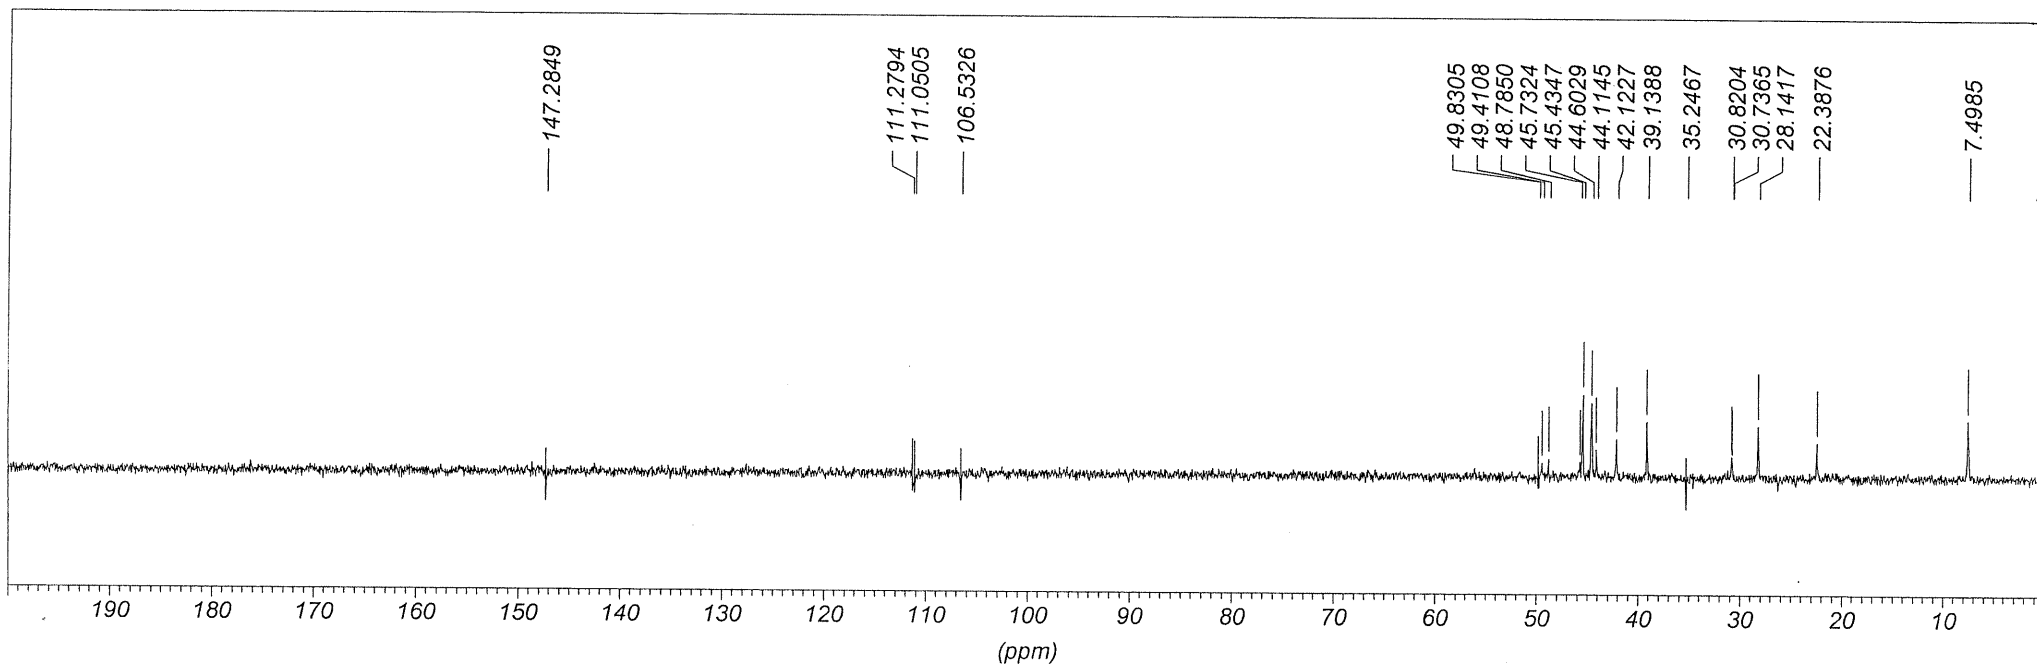

Data for 2-({[(2S)-1-[4-(3-carboxy-1-ethyl-6-fluoro-4-oxo-1,4-dihydroquinolin-7-yl)]-5-(3,4-dicarboxy-3-hydroxybutanamido)-1-oxopentan-2-yl]carbamoyl}methyl)-2-hydroxybutanedioic acid pentasodium salt (9d).

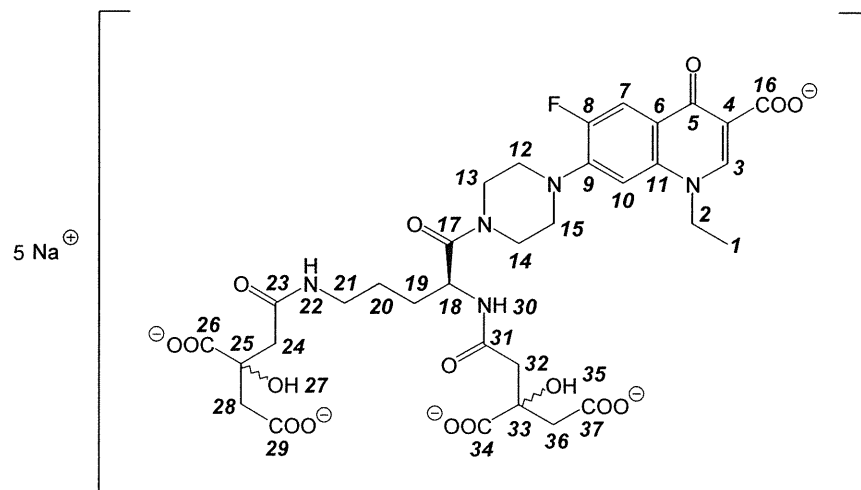

$^1\text{H NMR}$  ( $\text{D}_2\text{O}$ , 400 MHz)  $\delta_{\text{H}}$  8.53 (1H, s, H-3), 7.88 (1H, d,  $^3J_{\text{H-F}} = 13.1$  Hz, H-7), 7.14 (1H, d,  $^4J_{\text{H-F}} = 6.40$  Hz, H-10), 4.88-4.75 (1H, m, H-18), 4.42 (2H, br q,  $^3J_{\text{H-H}} = 13.7, 6.72$  Hz, H-2), 3.95-3.74 (4H, m, H-12, 15), 3.40-3.31 (4H, m, H-13, 14), 3.20-3.19 (2H, m, H-21), 2.75-2.42 (8H, m, H-24, 28, 32, 36), 1.74-1.68 (2H, m, H-19), 1.64-1.52 (2H, m, H-20), 1.47 (3H, t,  $^3J_{\text{H-H}} = 7.32$  Hz, H-1).

$^{13}\text{C NMR}$  ( $\text{D}_2\text{O}$ , 100 MHz)  $\delta_{\text{C}}$  181.27 (C=O, C-6), 179.80 (C=O, C-16), 179.12 (C=O, C-31), 176.32 (C=O, C-23), 173.65 (C=O, C-34), 173.41 (C=O, C-26), 172.87 (C=O, C-37), 172.39 (C=O, C-29), 154.09 (*ipso*-Ar,  $^1J_{\text{C-F}} = 249$  Hz, C-8), 148.03 (CH, C-3), 145.50 (*ipso*-Ar, d,  $^2J_{\text{C-F}} = 10.7$  Hz, C-9), 137.82 (*ipso*-Ar, C-4), 122.43 (*ipso*-Ar, C-6), 112.40 (CH, d,  $^2J_{\text{C-F}} = 23.8$  Hz, C-7), 106.77 (CH, C-10), 76.05 ( $4^\circ$ -C, C-33), 75.89 ( $4^\circ$ -C, C-25), 50.74 ( $\text{CH}_2$ , C-13, 14), 50.53 ( $\text{CH}_2$ , C-2), 50.42 (CH, C-18), 46.34 ( $\text{CH}_2$ , C-12/15), 45.52 ( $\text{CH}_2$ , C-32, 36), 45.02 ( $\text{CH}_2$ , C-24, 28), 43.06 ( $\text{CH}_2$ , C-12/15), 39.73 ( $\text{CH}_2$ , C-21), 29.46 ( $\text{CH}_2$ , C-19), 25.54 ( $\text{CH}_2$ , C-20), 14.60 ( $\text{CH}_3$ , C-1).

m7842sjm: 2(1,3-C)-L-Orn-Nrf [SJM-01-03-11]

Acquisition Freq. = 399.785 MHz

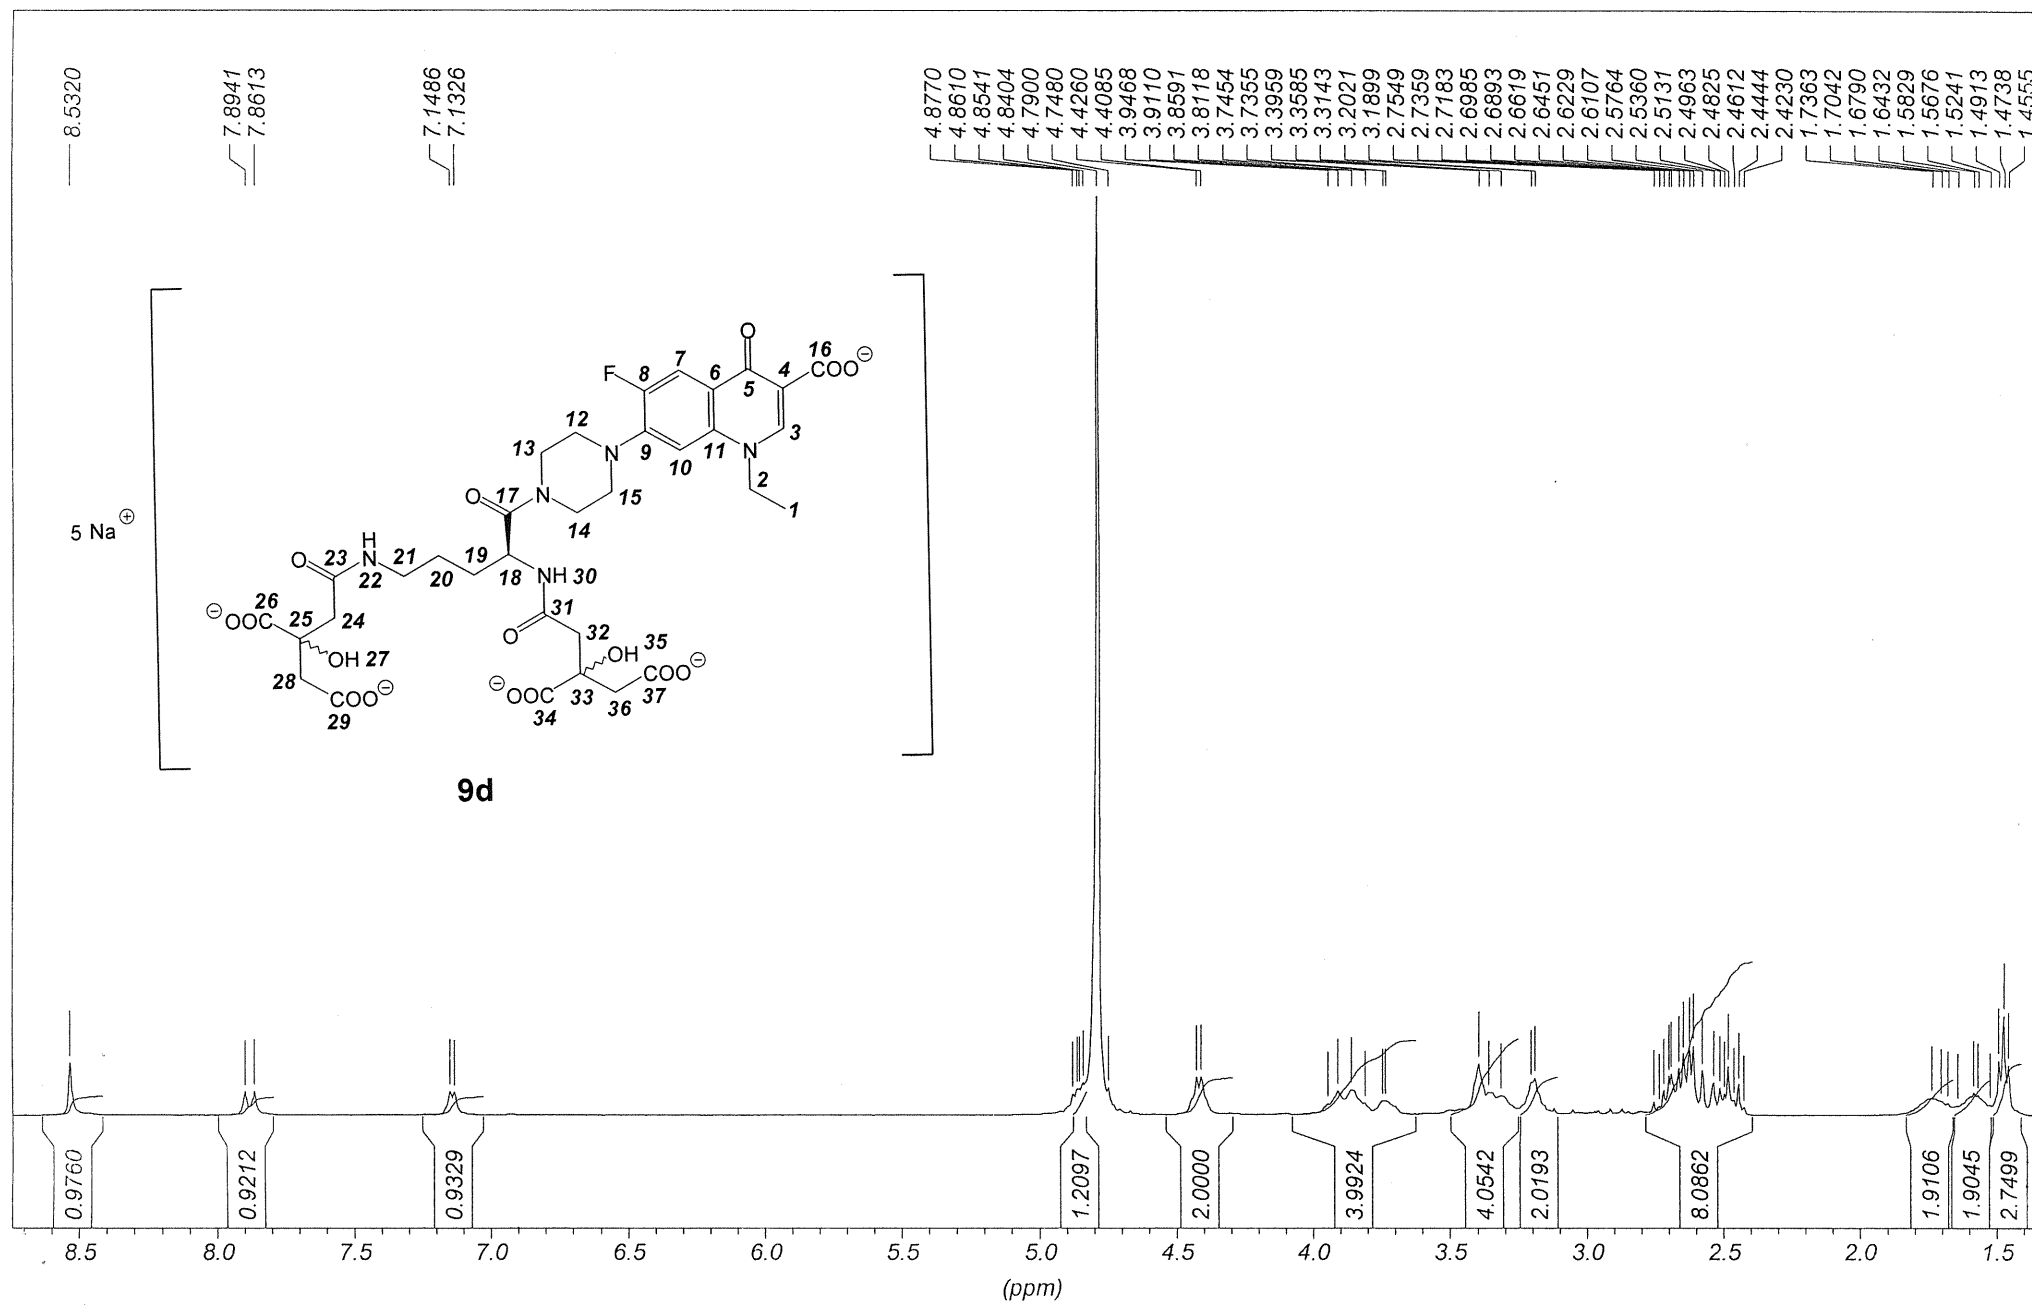



m8430sjm: 2(1,3-C)-L-Orn-Nrf [SJM-01-03-11]

Acquisition Freq. = 100.535 MHz

9d

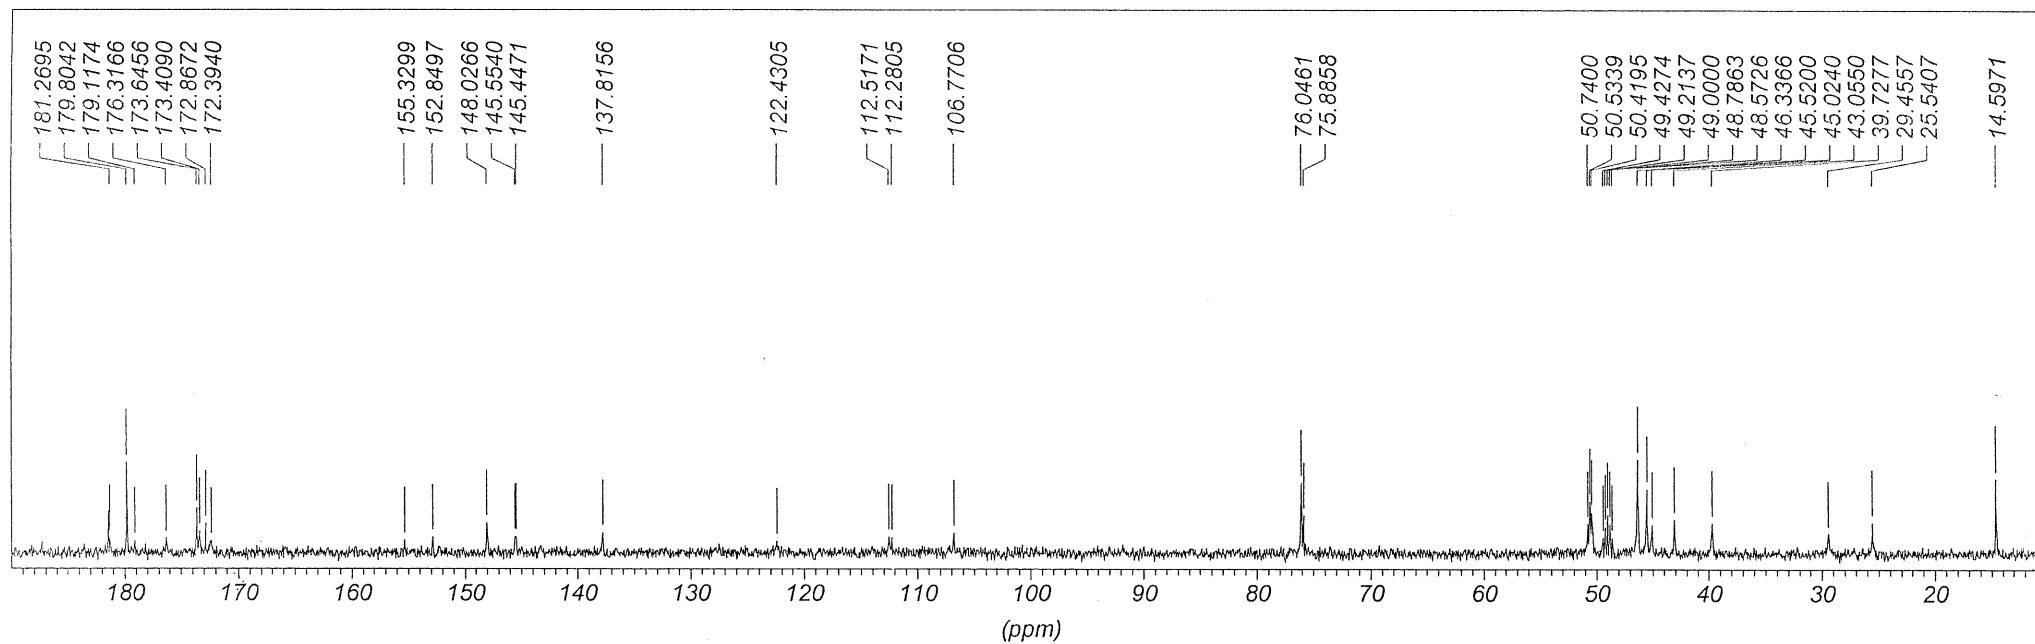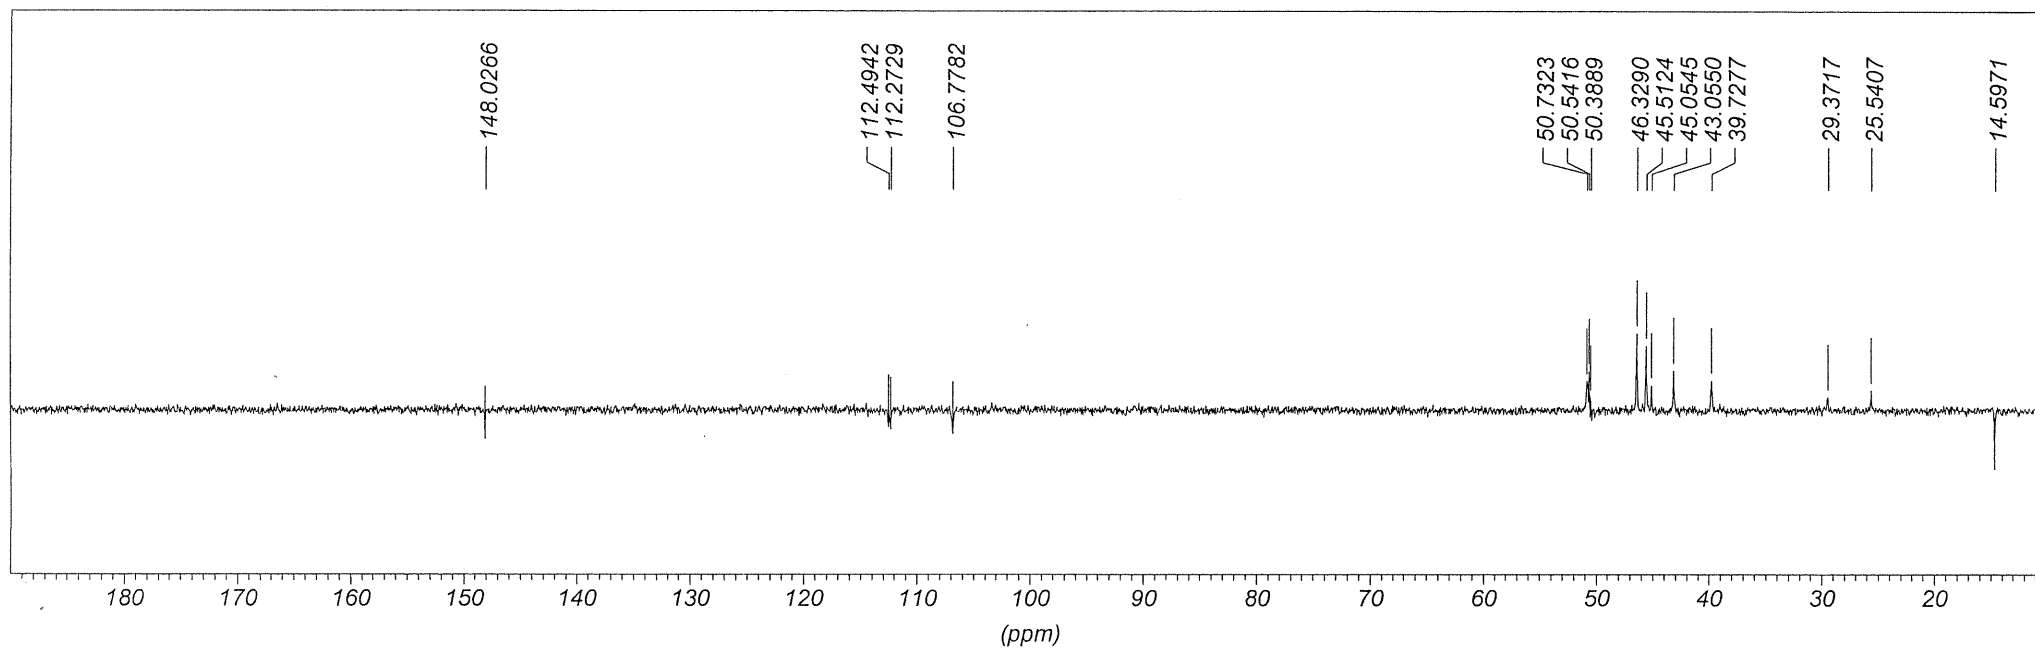

**Table S1.** Activity of the methyl-ester of ciprofloxacin (**3**), the methyl-ester of norfloxacin (**4**) and conjugates **6c** and **6d** in a disc diffusion assay.

| Bacterial Strain                                       | Diameter of zone of inhibition (mm) |                       |                        |                        |
|--------------------------------------------------------|-------------------------------------|-----------------------|------------------------|------------------------|
|                                                        | <b>3</b> <sup>a</sup>               | <b>4</b> <sup>b</sup> | <b>6c</b> <sup>a</sup> | <b>6d</b> <sup>b</sup> |
| <i>Staphylococcus aureus</i> (Oxford) NCTC 6571        | R                                   | R                     | R                      | R                      |
| <i>Staphylococcus aureus</i> NCTC 10399                | R                                   | R                     | R                      | 11                     |
| <i>Staphylococcus aureus</i> HG-1 <sup>c,d</sup>       | R                                   | R                     | R                      | R                      |
| <i>Staphylococcus aureus</i> NCTC 13142 <sup>c</sup>   | R                                   | R                     | R                      | R                      |
| <i>Staphylococcus aureus</i> NCTC 13143 <sup>c,d</sup> | R                                   | R                     | R                      | R                      |
| <i>Staphylococcus aureus</i> BIG 0052 <sup>c,d</sup>   | R                                   | R                     | R                      | R                      |
| <i>Staphylococcus epidermidis</i> NCTC 11047           | R                                   | R                     | R                      | R                      |
| <i>Staphylococcus epidermidis</i> NCTC 2749            | R                                   | R                     | R                      | R                      |
| <i>Staphylococcus haemolyticus</i> NCTC 11042          | R                                   | R                     | R                      | 14                     |
| <i>Escherichia coli</i> NCTC 10418                     | R                                   | R                     | 10                     | 8                      |
| <i>Escherichia coli</i> BIG 0046 <sup>d</sup>          | R                                   | R                     | R                      | R                      |
| <i>Escherichia coli</i> BIG 0051 <sup>d</sup>          | R                                   | R                     | R                      | R                      |
| <i>Pseudomonas aeruginosa</i> NCTC 6749                | R                                   | R                     | R                      | R                      |
| <i>Pseudomonas aeruginosa</i> BIG 0039                 | R                                   | R                     | R                      | R                      |
| <i>Pseudomonas aeruginosa</i> BIG 0037                 | R                                   | R                     | R                      | R                      |
| <i>Pseudomonas aeruginosa</i> NCTC 10662               | R                                   | R                     | R                      | R                      |
| <i>Pseudomonas aeruginosa</i> BIG 0063                 | R                                   | R                     | R                      | R                      |
| <i>Serratia marcescens</i> NCTC 1377                   | R                                   | R                     | R                      | R                      |
| <i>Burkholderia cepacia</i> NCTC 10744                 | R                                   | R                     | R                      | R                      |

R = resistant, zone of inhibition = 0 mm. <sup>a</sup>Compound discs equimolar with 5 µg ciprofloxacin were used in the assay. <sup>b</sup>Compound discs equimolar with 5 µg norfloxacin were used in the assay. <sup>c</sup>Methicillin-resistant *S. aureus* (MRSA). <sup>d</sup>Strains of clinical origin defined as resistant to ciprofloxacin by CLSI criteria.
